# Supplementary material for: Associations between intravaginal practices and incidence of sexually transmitted infections and bacterial vaginosis among women enrolled in the dapivirine vaginal ring trial (The Ring Study) in southwestern Uganda: a retrospective secondary analysis
Source: PubMed Central journal article supplement — BMJ Open. 2024 Apr 8;14(4):e079497. doi: 10.1136/bmjopen-2023-079497 (PMC11015298; doi:10.1136/bmjopen-2023-079497), 2024-04-08
Supplement: bmjopen-2023-079497.draft_revisions.pdf [file bmjopen-2023-079497.draft_revisions.pdf]

# BMJ Open

BMJ Open is committed to open peer review. As part of this commitment we make the peer review history of every article we publish publicly available.

When an article is published we post the peer reviewers' comments and the authors' responses online. We also post the versions of the paper that were used during peer review. These are the versions that the peer review comments apply to.

The versions of the paper that follow are the versions that were submitted during the peer review process. They are not the versions of record or the final published versions. They should not be cited or distributed as the published version of this manuscript.

BMJ Open is an open access journal and the full, final, typeset and author-corrected version of record of the manuscript is available on our site with no access controls, subscription charges or pay-per-view fees (<http://bmjopen.bmj.com>).

If you have any questions on BMJ Open's open peer review process please email [info.bmjopen@bmj.com](mailto:info.bmjopen@bmj.com)

# BMJ Open

## Effect of intravaginal practices on incidence of sexually transmitted infections and bacterial vaginosis among women enrolled in the Dapivirine vaginal ring trial (The Ring Study) in southwestern Uganda

|                               |                                                                                                                                                                                                                                                                                                                                                                                                                                                                                                                                   |
|-------------------------------|-----------------------------------------------------------------------------------------------------------------------------------------------------------------------------------------------------------------------------------------------------------------------------------------------------------------------------------------------------------------------------------------------------------------------------------------------------------------------------------------------------------------------------------|
| Journal:                      | <i>BMJ Open</i>                                                                                                                                                                                                                                                                                                                                                                                                                                                                                                                   |
| Manuscript ID                 | bmjopen-2023-079497                                                                                                                                                                                                                                                                                                                                                                                                                                                                                                               |
| Article Type:                 | Original research                                                                                                                                                                                                                                                                                                                                                                                                                                                                                                                 |
| Date Submitted by the Author: | 02-Sep-2023                                                                                                                                                                                                                                                                                                                                                                                                                                                                                                                       |
| Complete List of Authors:     | Kusemererwa, Sylvia; MRC/UVRI and LSHTM Uganda Research Unit<br>Ruzagira, Eugene; MRC/UVRI and LSHTM Uganda Research Unit; London School of Hygiene & Tropical Medicine Faculty of Epidemiology and Population Health<br>Kabarambi, Anita; International Centre for Child Health and Development<br>Onyango, Martin; MRC/UVRI and LSHTM Uganda Research Unit<br>Abaasa, Andrew; MRC/UVRI and LSHTM Uganda Research Unit, Statistics & Data Science; London School of Hygiene & Tropical Medicine, Infectious Disease Epidemiology |
| Keywords:                     | Public health < INFECTIOUS DISEASES, Sexually Transmitted Disease, HIV & AIDS < INFECTIOUS DISEASES, Epidemiology < INFECTIOUS DISEASES                                                                                                                                                                                                                                                                                                                                                                                           |
|                               |                                                                                                                                                                                                                                                                                                                                                                                                                                                                                                                                   |

SCHOLARONE™  
Manuscripts

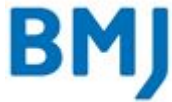

I, the Submitting Author has the right to grant and does grant on behalf of all authors of the Work (as defined in the below author licence), an exclusive licence and/or a non-exclusive licence for contributions from authors who are: i) UK Crown employees; ii) where BMJ has agreed a CC-BY licence shall apply, and/or iii) in accordance with the terms applicable for US Federal Government officers or employees acting as part of their official duties; on a worldwide, perpetual, irrevocable, royalty-free basis to BMJ Publishing Group Ltd ("BMJ") its licensees and where the relevant Journal is co-owned by BMJ to the co-owners of the Journal, to publish the Work in this journal and any other BMJ products and to exploit all rights, as set out in our [licence](#).

The Submitting Author accepts and understands that any supply made under these terms is made by BMJ to the Submitting Author unless you are acting as an employee on behalf of your employer or a postgraduate student of an affiliated institution which is paying any applicable article publishing charge ("APC") for Open Access articles. Where the Submitting Author wishes to make the Work available on an Open Access basis (and intends to pay the relevant APC), the terms of reuse of such Open Access shall be governed by a Creative Commons licence – details of these licences and which [Creative Commons](#) licence will apply to this Work are set out in our licence referred to above.

Other than as permitted in any relevant BMJ Author's Self Archiving Policies, I confirm this Work has not been accepted for publication elsewhere, is not being considered for publication elsewhere and does not duplicate material already published. I confirm all authors consent to publication of this Work and authorise the granting of this licence.

1  
2  
3 **Effect of intravaginal practices on incidence of sexually transmitted infections and**  
4 **bacterial vaginosis among women enrolled in the Dapivirine vaginal ring trial (The Ring**  
5 **Study) in southwestern Uganda**  
6  
7  
8  
9

10 **Authors:** Sylvia Kusemererwa<sup>1\*</sup>, Eugene Ruzagira<sup>1,3</sup>, Martin Onyango<sup>1</sup>, Anita Kabarambi<sup>4</sup>,  
11 Andrew Abaasa<sup>2,3</sup>  
12  
13  
14  
15

16 **Institution**  
17

18 <sup>1</sup>Department of viral pathogen epidemiology and interventions, Medical Research Council/  
19 Uganda Virus Research Institute and London School of Hygiene and Tropical Medicine, Uganda  
20 Research Unit, Entebbe, Uganda  
21  
22  
23

24 <sup>2</sup>Department of statistics, Medical Research Council/ Uganda Virus Research Institute and  
25 London School of Hygiene and Tropical Medicine, Uganda Research Unit, Entebbe, Uganda  
26  
27

28 <sup>3</sup> Department of infectious diseases epidemiology, London School of Hygiene & Tropical  
29 Medicine, London, UK  
30  
31

32 <sup>4</sup>Department of research, International Center for Child Health and Development, Masaka,  
33 Uganda  
34  
35  
36  
37  
38  
39  
40  
41

42 Correspondence to: Sylvia Kusemererwa, <sup>1</sup>Medical Research Council/Uganda Virus Research  
43 Institute (MRC/UVRI) and London School of Hygiene and Tropical Medicine (LSHTM),  
44 Uganda Research Unit, Plot 51-59, Nakiwogo Road, P.O Box 49 Entebbe, Uganda. Phone: 256  
45 (0) 417 704000, or 256 (0) 70229100. [Sylvia.Kusemererwa@mrcuganda.org](mailto:Sylvia.Kusemererwa@mrcuganda.org) or  
46  
47 [kansykarus@gmail.com](mailto:kansykarus@gmail.com)  
48  
49  
50  
51  
52  
53  
54  
55  
56  
57  
58  
59  
60

1  
2  
3 **Effect of intravaginal practices on incidence of sexually transmitted infections and**  
4 **bacterial vaginosis among women enrolled in the Dapivirine vaginal ring trial (The Ring**  
5 **Study) in southwestern Uganda**  
6  
7  
8  
9

10 **Abstract**

11 **Objectives:** We assessed the effect of intravaginal practices (IVP) on the incidence of sexually  
12 transmitted infections (STIs) and bacterial vaginosis (BV) among women using the dapivirine  
13 vaginal ring (DVR) or placebo vaginal ring in southwestern Uganda.  
14  
15

16 **Methods:** Women at risk of HIV infection were recruited into The Ring Study that evaluated the  
17 safety and efficacy of the DVR between 2013 and 2016. At baseline, a behavioral questionnaire  
18 was administered to obtain information on sexual activity and IVP (exposure) defined as; insertion  
19 inside the vagina of any items aimed at cleaning the vagina for any reason before, during or after  
20 sex other than practices to manage menses. Each participant self-inserted the DVR/placebo and  
21 replaced it every 4weeks for 2 years. Outcomes were diagnosis of STIs i.e., *Chlamydia trachomatis*  
22 (CT), *Neisseria gonorrhoea* (NG), *Trichomonas vaginalis* (TV), HIV and BV. The incidence rate  
23 of STI/BV was estimated, overall, by IVP and trial arm in single-event-per-subject and multiple-  
24 event-per-subject analyses.  
25  
26  
27  
28

29 **Results:** Of the 197 women enrolled, 66 (33.5%) were <25 years of age. Overall, 93 (47.2%)  
30 practiced at least one form of IVP. During follow up, 172 (87.3%) women were diagnosed with an  
31 STI/BV at least once. Majority had TV (73.6%, n=145). Overall rate of STI/BV was 51.9/100  
32 person-years, 95% confidence interval (CI): 44.7-60.3 [IVP: Yes, 51.0 (40.8-63.8) vs. No, 52.6  
33 (43.0-64.4)]. IVP were not statistically significantly associated with rate of individual STIs/BV.  
34 Similar results were observed when the analyses were conducted separately for each trial arm.  
35  
36  
37

38 **Conclusions:** IVP had no effect on the risk of STIs/BV in The Ring Study.  
39  
40

41 **Registration no:** NCT01539226  
42  
43

44 **Key words:** Intravaginal practices, sexually transmitted infection, Bacterial vaginosis,  
45  
46

47 Dapivirine, Vaginal Ring, Uganda  
48  
49

50 **Study strengths and limitations**  
51  
52

53 The strengths of this study is that we were able to investigate multiple STIs and BV in the same  
54 population. The study also had the ability to collect recurrent data on genital conditions which  
55  
56  
57

1  
2  
3 allowed for conduct of both single-event-per-subject and multiple-event-per-subject analyses. The  
4 limitations of the study included a small sample size and confirmatory tests that were not done to  
5 confirm absence of an STI/BV prior to DVR insertion.  
6  
7  
8  
9  
10  
11  
12  
13  
14  
15  
16  
17  
18  
19  
20  
21  
22  
23  
24  
25  
26  
27  
28  
29  
30  
31  
32  
33  
34  
35  
36  
37  
38  
39  
40  
41  
42  
43  
44  
45  
46  
47  
48  
49  
50  
51  
52  
53  
54  
55  
56  
57  
58  
59  
60

For peer review only

## INTRODUCTION

Sexually transmitted infections (STIs) remain a health challenge globally. In 2018, WHO estimated that nearly one million people become infected every day with a curable STI caused by: *Chlamydia trachomatis* (CT), *Neisseria gonorrhoea* (NG), or *Trichomonas vaginalis* (TV)<sup>1</sup>. STIs disproportionately affect low-income and middle-income countries, with 90% of the new infections occurring in these countries<sup>2</sup>. Women in sub-Saharan Africa are majorly affected by STIs, with those at high risk of HIV infection also having high STI burden<sup>3 4</sup>. Bacterial vaginosis (BV), a common vaginal condition has also been associated with increased risk of STIs and HIV infection<sup>5</sup>. High rates (37% to 68%) of BV have been reported among women in Southern and East Africa<sup>6</sup>.

The high prevalence and increased risk of acquisition of STIs/BV has been associated with intravaginal practices<sup>7</sup>. The latter include various behaviors that women use to manage their sexual life and health<sup>8</sup>. These practices are often used for genital hygiene and to make women sexually desirable<sup>9 10</sup>. Products used have been associated with increased vaginal pH resulting in overgrowth of organisms related to BV, which has also been associated with increased risk of HIV acquisition<sup>11 12</sup>. Practices which increase a woman's susceptibility to HIV could reduce the effectiveness of vaginal microbicides<sup>13 14</sup>.

The monthly dapivirine vaginal ring (DVR), a female controlled HIV prevention tool, was found to reduce the risk of HIV acquisition by approximately 30% in two phase 3 trials<sup>15 16</sup>. With continued and consistent use, risk reduction was even greater (62%) in an open-label extension trial<sup>17</sup>. However, data are limited on the effect of intravaginal practices on vaginal flora and risk of STIs/BV among women using the DVR. We assessed the effect of vaginal practices on the incidence of STIs/BV among women using the DVR or placebo vaginal ring in southwestern Uganda.

## METHODS

### Study design

1  
2  
3 This was a secondary analysis using data collected in the The Ring Study, a phase 3 microbicide  
4 trial<sup>15</sup>.  
5  
6

### 7 **Study setting and population**

8  
9 Details of the Ring Study have been described elsewhere <sup>15</sup>. Briefly, The Ring Study was a  
10 multicenter microbicide trial, that evaluated the safety and efficacy of the DVR between 2013 and  
11 2016 in Uganda and South Africa. The study was sponsored by the International Partnership for  
12 Microbicides. In Uganda, the study was conducted by the Medical Research Council  
13 (MRC)/Uganda Virus Research Institute (UVRI) and London School of Hygiene and Tropical  
14 Medicine (LSHTM) Uganda Research Unit in Masaka, southwestern Uganda. The site recruited  
15 women at risk of HIV infection from towns along the trans-African highway and the shores of  
16 Lake Victoria. Details of the recruitment procedures and study population have been described  
17 elsewhere <sup>18</sup>.  
18  
19  
20  
21  
22  
23  
24  
25  
26  
27

### 28 **Study procedures**

29  
30 Participants consented for screening and enrolment on two separate occasions. At the first visit  
31 (screening), data on demographics, inclusion and exclusion criteria were obtained. A physical and  
32 genital examination was done. All potential participants were provided with HIV/STI risk-  
33 reduction counselling and HIV pre- and post-test counselling. At the second visit (enrolment),  
34 women who met all inclusion criteria and no exclusion criteria, had a normal pelvic examination,  
35 and negative HIV rapid tests were enrolled into the trial. Eligible women were randomised in a 2:1  
36 ratio to either the DVR arm or placebo arm. At the enrolment visit, an interviewer-administered  
37 behavioral questionnaire was used to obtain baseline information on sexual activity and vaginal  
38 practices. At 4 weeks post-enrolment and every 24 weeks thereafter for the next 2 years, follow-  
39 up data on vaginal practices were collected using an interviewer-administered behavioral  
40 questionnaire. Participants self-inserted the vaginal rings every 4 weeks for up to 104 weeks.  
41  
42  
43  
44  
45  
46  
47  
48  
49  
50  
51

52 **Measurement of exposure [intravaginal practices (IVP)]:** IVP was defined as insertion inside  
53 the vagina of any items aimed at cleaning the vagina for any reason before, during or after sex  
54 other than practices to manage menses. Items included: materials such as paper, cloth, or cotton  
55  
56  
57



1  
2  
3 wool; water only; water and soap; fingers to clean or insert something. Women were asked if they  
4 were inserting or using any of the aforementioned items inside the vagina to clean their vagina  
5 either as a general cleaning/hygiene practice before or after sex or to prepare the vagina for sex in  
6 the past, at baseline and every 24 weeks.  
7  
8  
9

10  
11  
12 **Measurement of outcome (diagnosis of STIs/BV):** Cervico-vaginal samples were collected at  
13 the first screening visit and every 12 weeks (3 months) for 2 years. Samples were tested for TV  
14 (OSOM® Trichomonas Rapid test- Sekisui Diagnostics, LLC, USA) and CT/NG (Cobas®  
15 Amplicor CT/NG -PCR test, Roche Diagnostic Systems, Branchburg, New Jersey). Vaginal  
16 samples were also collected for assessment of vaginal flora (using Nugent's score) and vaginal  
17 fluid pH at the enrolment visit (prior to ring insertion) and every 12 weeks. Samples with a score  
18 of  $\geq 7$  were classified as BV present.  
19  
20  
21  
22  
23  
24

25 Participants were tested for HIV at the screening and enrolment visit. Serial rapid HIV  
26 antibody tests were done using Alere Determine™ HIV-1/2 (Alere, Medical co., Ltd, Matsuhidai,  
27 Matsudo-shi, Chiba, Japan) followed by OraQuick- ADVANCE® Rapid HIV-1/2 Test (OraQuick-  
28 OraSure Technologies Inc, Pennsylvania) to confirm a positive Determine result and Uni- Gold™  
29 HIV (Trinity Biotech, Ireland) as the tie breaker. At the screening/enrolment visits, a participant  
30 was confirmed to have HIV infection if they tested positive on at least two rapid HIV antibody  
31 tests. Post-enrolment, HIV testing was done serially as described above. However, for participants  
32 who tested positive or discordant on two rapid HIV antibody tests, a confirmatory test using  
33 Western Blot (J. Mitra and Co.Pvt. ltd, India) was done as previously described<sup>15</sup>. Blood samples  
34 were collected and stored every 4 weeks. Stored samples for participants with confirmed HIV  
35 infection were retrospectively tested for HIV using the HIV RNA PCR test.  
36  
37  
38  
39  
40  
41  
42  
43  
44  
45  
46

#### 47 **Statistical analysis**

48  
49 Data analyses were performed in STATA version 15.0 (Stata Corp, College Station, TX, USA).  
50 Participants' characteristics were summarized using frequencies and percentages overall and by  
51 IVP status. We determined the proportion of participants that were positive for a given STI/BV as  
52 the number who tested positive for an STI/BV at least once during the study divided by the total  
53 number tested. We determined the effect of IVP on the incidence of each STI/BV, by estimating  
54  
55  
56  
57

1  
2  
3 the rate of STI/BV overall and stratified by IVP status. We used two approaches for measuring the  
4 rate of STI/BV; (a) a single-event-per-subject and (b) a multiple-event-per-subject. The incidence  
5 rate of a given STI/BV was estimated as the number of participants who tested positive for STI/BV  
6 divided by the person-time (years) at risk (pyr) expressed as per 100 pyr. PYR were estimated as  
7 a sum of the time from enrolment into the trial (those negative at baseline) to the date of trial  
8 completion or censoring (stopped trial visits or ring use). Participants that tested positive for  
9 STI/BV at baseline were given treatment and started to contribute person-time after completing  
10 the course of treatment. We further adjusted the effect of IVP on rate of STI/BV for age and  
11 baseline STI/BV status by fitting Poisson regression models. In the analysis, we used Poisson  
12 regression model with time-varying covariates, allowing for intergroup correlation (because  
13 women had multiple records) by using robust standard errors.  
14  
15  
16  
17  
18  
19  
20  
21  
22  
23  
24

### 25 **Compliance with Ethical Standards**

26  
27 Approval was obtained from the Uganda Virus Research Institute Research Ethics Committee  
28 (Ref#-GC/127/13/03/33), the Uganda National Council of Science and Technology (Ref#-  
29 HS1362) and the National Drug Authority (Ref#-166/ESR/NDA/DID-07/2013). Written informed  
30 consent was obtained from each woman before any study procedures were performed. Women  
31 who tested HIV-positive were referred to an HIV care provider of their choice. Treatment was  
32 provided to those who tested positive for STIs/BV according to the Centers for Disease Control  
33 and Prevention (CDC) STD Treatment guidelines 2010<sup>19</sup>.  
34  
35  
36  
37  
38  
39  
40  
41  
42

### 43 **Patient and Public Involvement Statement**

44  
45 Communities where the study was conducted were involved from the inception of the study.  
46 Community gate keepers: Local Council leaders, political leaders, village health teams,  
47 community based and faith based organizations were informed of the study via various  
48 engagement meetings prior to study start. The site Community Advisory Board members were  
49 engaged to review study documents, consent and other study literacy documents and confirm  
50 translations to the local language. Volunteer recruitment and retention was supported by local  
51 leaders. Results were disseminated to study participants, CAB and community members through  
52  
53  
54  
55  
56  
57  
58  
59  
60

community meetings upon study completion and presentations at national and international meetings, seminars and conferences.

## RESULTS

### Socio-demographic characteristics

Of the 197 women enrolled (67% on the DVR arm) in the trial, 66 (33.5%) were less than 25 years of age, 82 (41.6%) were married and very few [24 (12.2%)] had secondary school education. Majority (82.2%, n=162) of the women reported having a main partner but only 75 (46.3%) lived with this partner (Table 1). About a half (50.1%, n=100) of the women tested positive for an STI/BV at baseline.

**Table 1: Baseline characteristics of 197 women enrolled in The Ring Study in southwestern Uganda**

| Variable                                 | All<br>n (%) | Intravaginal practices |              | p-value      |
|------------------------------------------|--------------|------------------------|--------------|--------------|
|                                          |              | No<br>n (%)            | Yes<br>n (%) |              |
| Overall                                  | 197          | 104 (52.8)             | 93 (47.2)    |              |
| Trial arm                                |              |                        |              | 0.835        |
| Dapivirine vaginal ring                  | 132 (67.0)   | 69 (52.3)              | 63 (47.7)    |              |
| Placebo                                  | 65 (33.0)    | 35 (53.8)              | 30 (46.2)    |              |
| Age (years)                              |              |                        |              | 0.275        |
| 18-24                                    | 66 (33.5)    | 30 (45.4)              | 36 (54.6)    |              |
| 25-34                                    | 98 (49.8)    | 57 (58.2)              | 41 (41.8)    |              |
| 35+                                      | 33 (16.7)    | 17 (51.5)              | 16 (48.5)    |              |
| Education level                          |              |                        |              | 0.276        |
| Incomplete primary school                | 68 (34.5)    | 37 (54.4)              | 31 (45.6)    |              |
| Complete primary school                  | 105 (53.3)   | 58 (55.2)              | 47 (44.8)    |              |
| Secondary school*                        | 24 (12.2)    | 9 (37.5)               | 15 (62.5)    |              |
| Marital status                           |              |                        |              | <b>0.020</b> |
| Single and never married                 | 90 (45.7)    | 38 (42.2)              | 52 (57.8)    |              |
| Single but previously married            | 25 (12.7)    | 14 (56.0)              | 11 (44.0)    |              |
| Married                                  | 82 (41.6)    | 52 (63.4)              | 30 (36.6)    |              |
| Has main partner                         |              |                        |              | 0.194        |
| No                                       | 35 (17.8)    | 15 (42.9)              | 20 (57.1)    |              |
| Yes                                      | 162 (82.2)   | 89 (54.9)              | 73 (45.1)    |              |
| Duration lived with main partner (years) |              |                        |              | 0.690        |
| <1                                       | 35 (21.6)    | 17 (48.6)              | 18 (51.4)    |              |
| 1-2                                      | 34 (21.0)    | 19 (55.9)              | 15 (44.1)    |              |
| 3+                                       | 93 (57.4)    | 53 (57.0)              | 40 (43.0)    |              |

|                                            |            |           |           |       |
|--------------------------------------------|------------|-----------|-----------|-------|
| Lived with (main) partner in the past year |            |           |           | 0.171 |
| All the time                               | 48 (37.8)  | 38 (61.3) | 24 (38.7) |       |
| Some of the time                           | 14 (11.0)  | 7 (36.8)  | 12 (63.2) |       |
| No                                         | 65 (51.2)  | 44 (54.3) | 37 (45.7) |       |
| Currently lives with main partner          |            |           |           | 0.376 |
| No                                         | 87 (53.7)  | 45 (51.7) | 42 (48.3) |       |
| Yes                                        | 75 (46.3)  | 44 (58.7) | 31 (41.3) |       |
| Baseline STI/BV status                     |            |           |           | 0.528 |
| Negative                                   | 97 (49.2)  | 49 (50.5) | 48 (49.5) |       |
| Positive                                   | 100 (50.8) | 55 (55.0) | 45 (45.0) |       |

n=Number; \*Includes one woman who had greater than secondary education

## IVP

Ninety-three (47.2%) women reported at least one form of IVP. The commonly used substances to clean the vagina included: soap (n=73, 78.5%), cloth (n=5, 5.4%), detergent (n=3, 3.2%) and others (honey, herbs, perfume n=6, 6.5%). Reported IVP were more common among single and never married women compared to single but previously married or currently married women (p=0.020) (Table 1).

## Proportion and rate of STIs/BV

A total of 172 (87.3%) women were diagnosed with an STI at least once during follow up, with an overall incidence rate of 51.9 per 100 pyr. The most common STI was TV (73.6%, n=145/197 diagnosed at least once) with a rate of 92.7 per 100 pyr and 88.9 per 100 pyr in the single-event-per-subject and multiple-events-per-subject analysis respectively (Table 2).

## Effect of IVP on rate of STIs/BV

In the single-event-per-subject analysis, STI and BV rates were not associated with reported IVP (Table 2). However, in the multiple-events-per subject analysis, the rate of CT was statistically significantly lower among women who reported IVP versus those who did not (p=0.030). After adjusting for participant characteristics, overall, in both the single-event and multiple-event per subject analyses, IVP was not associated with any significant change in STI/BV rates (Table 3). There was also no effect of IVP on STI/BV rates in the different trial arms.

**Table 2: Effect of intravaginal practices on rate of sexually transmitted infection/Bacterial vaginosis among women in the Ring Study in southwestern Uganda**

| Sexually transmitted infection/condition    | Single-event-per-subject analysis |                              |                             |         |                  |                  |
|---------------------------------------------|-----------------------------------|------------------------------|-----------------------------|---------|------------------|------------------|
|                                             | Overall<br>Rate/100 PYR (95% CI)  | Intravaginal practices       |                             | p-value | uRR (95% CI)     | aRR (95% CI)     |
|                                             |                                   | Yes<br>Rate/100 PYR (95% CI) | No<br>Rate/100 PYR (95% CI) |         |                  |                  |
| HIV                                         | 5.8 (3.0-11.1)                    | 7.0 (2.9-17.0)               | 4.7 (1.8-12.4)              | 0.278   |                  |                  |
| <i>Trichomonas vaginalis</i>                | 92.7 (78.7-109.0)                 | 97.4 (76.9-123.3)            | 88.7 (70.9-111.1)           | 0.288   | 1.10 (0.79-1.52) | 1.10 (0.67-1.63) |
| <i>Neisseria gonorrhoea</i>                 | 23.4 (18.3-29.9)                  | 22.8 (15.9-32.9)             | 23.8 (17.0-33.4)            | 0.435   | 0.96 (0.58-1.57) | 0.99 (0.56-1.79) |
| <i>Chlamydia trachomatis</i>                | 28.4 (22.7-35.6)                  | 27.9 (20.2-38.8)             | 28.9 (21.2-39.4)            | 0.446   | 0.97 (0.62-1.52) | 0.83 (0.50-1.38) |
| Bacterial vaginosis                         | 14.1 (10.6-18.6)                  | 13.4 (8.9-20.4)              | 14.7 (10.1-21.4)            | 0.383   | 0.92 (0.52-1.61) | 1.13 (0.53-2.37) |
| <b>Multiple-events-per-subject analysis</b> |                                   |                              |                             |         |                  |                  |
| <i>Trichomonas vaginalis</i>                | 88.9 (79.6-99.5)                  | 90.2 (76.8-106.0)            | 87.9 (75.3-102.5)           | 0.406   | 1.03 (0.77-1.37) | 1.07 (0.80-1.43) |
| <i>Neisseria gonorrhoea</i>                 | 28.4 (23.3-34.6)                  | 28.7 (21.5-38.1)             | 28.2 (21.5-37.0)            | 0.935   | 1.02 (0.61-1.69) | 0.99 (0.59-1.67) |
| <i>Chlamydia trachomatis</i>                | 43.6 (37.2-51.1)                  | 36.6 (28.4-47.1)             | 49.9 (40.7-61.2)            | 0.030   | 0.73 (0.45-1.20) | 0.64 (0.38-1.05) |
| Bacterial vaginosis                         | 18.8 (11.1-31.7)                  | 12.1 (4.5-32.2)              | 24.1 (13.0-44.8)            | 0.124   | 0.51 (0.13-1.95) | 0.48 (0.16-1.47) |

PYR = person-years at risk; CI = Confidence interval; uRR = unadjusted rate ratio; aRR = adjusted rate ratio; ¶Adjusted for age, trial arm, STI/BV at baseline

**Table 3: Effect of intravaginal practices on rate of sexually transmitted infection/Bacterial vaginosis stratified by trial arm among women in the Ring Study in southwestern Uganda**

| Single-event-per-subject analysis        |         |                       |                       |         |                       |                           |
|------------------------------------------|---------|-----------------------|-----------------------|---------|-----------------------|---------------------------|
| Sexually transmitted infection/condition | Overall | Trial arm             |                       | p-value | aRR (DVR)<br>(95% CI) | aRR (Placebo)<br>(95% CI) |
|                                          | IVP use | DVR                   | Placebo               |         |                       |                           |
|                                          |         | Rate/100 PYR (95% CI) | Rate/100 PYR (95% CI) |         |                       |                           |
| HIV                                      | Yes     | 7.0 (2.9-17.0)        | 4.7 (1.8-12.4)        | 0.278   |                       |                           |
| <i>Trichomonas vaginalis</i>             | Yes     | 105.8 (79.7-140.4)    | 82.4 (53.7-126.4)     | 0.171   | 1.34 (0.78-2.31)      | 0.59 (0.28-1.26)          |
| <i>Neisseria gonorrhoea</i>              | Yes     | 20.6 (13.0-32.6)      | 28.0 (15.5-50.5)      | 0.211   | 0.73 (0.35-1.53)      | 1.88 (0.49-7.20)          |
| <i>Chlamydia trachomatis</i>             | Yes     | 29.7 (20.2-43.6)      | 24.3 (13.1-45.2)      | 0.305   | 1.09 (0.60-2.00)      | 0.37 (0.11-1.36)          |
| Bacterial vaginosis                      | Yes     | 12.6 (7.5-21.3)       | 15.2 (7.6-30.3)       | 0.332   | 0.74 (0.26-2.09)      | 1.51 (0.35-6.52)          |
| Multiple-events-per-subject analysis     |         |                       |                       |         |                       |                           |
| <i>Trichomonas vaginalis</i>             | Yes     | 94.4 (77.9-114.2)     | 81.5 (60.5-109.9)     | 0.213   | 1.12 (0.80-1.56)      | 0.76 (0.44-1.30)          |
| <i>Neisseria gonorrhoea</i>              | Yes     | 25.2 (17.4-36.4)      | 36.0 (23.0-56.5)      | 0.116   | 0.74 (0.42-1.30)      | 2.24 (0.61-8.31)          |
| <i>Chlamydia trachomatis</i>             | Yes     | 40.4 (30.2-54.2)      | 28.4 (17.1-47.2)      | 0.126   | 0.75 (0.43-1.29)      | 0.33 (0.14-0.78)          |
| Bacterial vaginosis                      | Yes     | 12.5 (4.0-38.7)       | 11.1 (1.6-78.7)       | 0.491   | 0.64 (0.11-3.71)      | 0.39 (0.10-2.72)          |

PYR = person-years at risk; CI = Confidence interval; uRR = unadjusted rate ratio; aRR = adjusted rate ratio; †Adjusted for age, and STI/BV at baseline

## DISCUSSION

Our study aimed to assess the effect of IVP on the incidence of STIs and BV among women using the DVR or placebo. Overall, we found that nearly one in every two women practiced at least one form of IVP. IVP have been reported to be high in African women with proportions of between 30-50%, and even higher among women at risk of acquiring HIV<sup>20 21</sup>.

Overall, we found no association between IVP and incidence of STI (including HIV) or BV. IVP have been associated with change in the vaginal flora, resulting in an increase majorly of BV, that increases one's susceptibility to acquiring other STIs like CT and NG<sup>5 6</sup>. Most of the reported associations have been between IVP and BV and HIV acquisition<sup>12</sup>. However, studies done in Africa have had conflicting results. Whereas one systematic review found that IVP increased the risk of vaginal infections (BV, TV, and vulvovaginal candidiasis)<sup>22</sup>, two others found no association between IVP and TV<sup>9 23</sup> or BV<sup>23</sup>. One study in South Africa found that IVP was associated with increased risk of HIV infection but not other STIs<sup>24</sup>.

We also found no association between IVP and incidence of STI (including HIV) or BV when the analyses were conducted separately for each trial arm. The DVR has been associated with minimal changes in the vaginal microbiota that were likely not clinically significant<sup>25</sup>. It has generally been found to be well tolerated in adult as well as adolescent girls and young women<sup>26 27</sup>. Various studies on microbicides have reported that their use may result in little or no difference in the risk of acquiring STIs like CT, NG or TV<sup>28</sup>.

The strengths of this study included the opportunity to investigate multiple STIs and BV in the same population and the ability to collect recurrent data on genital conditions which allowed for conduct of both single-event-per-subject and multiple-event-per-subject analyses. The multiple-event-per-subject analysis models the total rate of events over the entire follow-up period and has more power for detecting associations compared to the single-event-per-subject analysis<sup>29</sup>.

A limitation of the study was the small sample size which may have impacted the study power and consequently the ability to detect any differences in STI/BV rates between women who reported IVP and those who did not. Another limitation was that no confirmatory tests were done to confirm absence of an STI/BV prior to DVR insertion. However, duration of treatment and absence of symptoms and signs were used as a proxy for lack of an STI/BV.

1  
2  
3 In conclusion, we found a high prevalence of IVP and incidence of STIs/BV among women  
4 enrolled in the Ring Study in Uganda. IVP did not statistically significantly impact STI/BV rates. An  
5 analysis with a bigger sample size could be helpful to better understand whether there is a link between  
6 use of the DVR, IVP, and incidence of STIs/BV.  
7  
8  
9

## 10 11 12 **Acknowledgements**

13  
14  
15 International Partnership for Microbicides' (a not-for-profit product-development partnership) work is  
16 made possible by generous support from many donors including: the Bill and Melinda Gates  
17 Foundation, Irish Aid, the Ministry of Foreign Affairs of Denmark, the Ministry of Foreign Affairs of  
18 the Netherlands, the Norwegian Agency for Development Cooperation, the U.K. Department for  
19 International Development, the American people through the U.S. Agency for International  
20 Development, and the President's Emergency Plan for AIDS Relief. We thank the study team who  
21 worked tirelessly in planning, recruitment and data collection for this study.  
22  
23  
24  
25  
26  
27

28 **Competing interests:** All authors declare that they have no conflict of interest.  
29  
30

31 **Funding:** This work was supported by the International Partnership for Microbicides  
32 ([www.ipmglobal.org](http://www.ipmglobal.org)), grant number (IND # 110,659).  
33  
34  
35

## 36 37 **Author Contributions:**

38 SK, AA, ER designed the study and wrote the initial manuscript draft, and AA did the data analysis.  
39 KA and MO conducted the study while SK directed the work. KA and MO contributed to the writing  
40 and editing of the manuscript. All authors contributed to the interpretation of the results and critically  
41 commented and provided revisions to the manuscript. All authors approved the final version of the  
42 manuscript. The corresponding author attests that all listed authors meet authorship criteria and that no  
43 others meeting the criteria have been omitted.  
44  
45  
46  
47  
48  
49

50 **Data availability statement:** Data are available on reasonable request.  
51  
52  
53  
54  
55  
56  
57  
58  
59  
60



## References

1. World Health Organization. Report on global sexually transmitted infection surveillance 2018, 2018.
2. Unemo M, Bradshaw CS, Hocking JS, et al. Sexually transmitted infections: challenges ahead. *The Lancet Infectious Diseases* 2017;17(8):e235-e79. doi: [https://doi.org/10.1016/S1473-3099\(17\)30310-9](https://doi.org/10.1016/S1473-3099(17)30310-9)
3. Torrone EA, Morrison CS, Chen P-L, et al. Prevalence of sexually transmitted infections and bacterial vaginosis among women in sub-Saharan Africa: an individual participant data meta-analysis of 18 HIV prevention studies. *PLoS medicine* 2018;15(2):e1002511.
4. Awungafac G, Delvaux T, Vuylsteke B. Systematic review of sex work interventions in sub-Saharan Africa: examining combination prevention approaches. *Tropical Medicine & International Health* 2017;22(8):971-93.
5. Bayigga L, Kateete DP, Anderson DJ, et al. Diversity of vaginal microbiota in sub-Saharan Africa and its effects on HIV transmission and prevention. *American journal of obstetrics and gynecology* 2019;220(2):155-66. doi: 10.1016/j.ajog.2018.10.014 [published Online First: 2018/10/16]
6. Bautista CT, Wurapa E, Sateren WB, et al. Bacterial vaginosis: a synthesis of the literature on etiology, prevalence, risk factors, and relationship with chlamydia and gonorrhea infections. *Military Medical Research* 2016;3:4. doi: 10.1186/s40779-016-0074-5 [published Online First: 2016/02/16]
7. Van De Wijgert J, Mason PR, Gwanzura L, et al. Intravaginal practices, vaginal flora disturbances, and acquisition of sexually transmitted diseases in Zimbabwean women. *The Journal of infectious diseases* 2000;181(2):587-94.
8. Martin Hilber A. Women's health, hygiene and HIV in Sub-Saharan Africa: The role of vaginal practices. Ghent University, 2012.
9. Hilber AM, Francis SC, Chersich M, et al. Intravaginal practices, vaginal infections and HIV acquisition: systematic review and meta-analysis. *PloS one* 2010;5(2):e9119. doi: 10.1371/journal.pone.0009119 [published Online First: 2010/02/18]
10. Woodsong C, Alleman P. Sexual pleasure, gender power and microbicide acceptability in Zimbabwe and Malawi. *AIDS Education and Prevention* 2008;20(2):171.
11. van de Wijgert JH. The vaginal microbiome and sexually transmitted infections are interlinked: consequences for treatment and prevention. *PLoS medicine* 2017;14(12):e1002478.
12. Low N, Chersich MF, Schmidlin K, et al. Intravaginal practices, bacterial vaginosis, and HIV infection in women: individual participant data meta-analysis. *PLoS medicine* 2011;8(2):e1000416. doi: 10.1371/journal.pmed.1000416 [published Online First: 2011/03/02]
13. Chersich M, Hilber AM, Schmidlin K, et al. Association between intravaginal practices and HIV acquisition in women: individual patient data meta-analysis of cohort studies in sub-Saharan Africa. 5th IAS Conference on HIV Pathogenesis, Treatment and Prevention, 2009.
14. Francis SC, Baisley K, Lees SS, et al. Vaginal practices among women at high risk of HIV infection in Uganda and Tanzania: recorded behaviour from a daily pictorial diary. *PloS one* 2013;8(3):e59085.
15. Nel A, van Niekerk N, Kapiga S, et al. Safety and Efficacy of a Dapivirine Vaginal Ring for HIV Prevention in Women. *The New England journal of medicine* 2016;375(22):2133-43. doi: 10.1056/NEJMoa1602046 [published Online First: 2016/12/14]
16. Baeten JM, Palanee-Phillips T, Brown ER, et al. Use of a vaginal ring containing dapivirine for HIV-1 prevention in women. *New England Journal of Medicine* 2016;375(22):2121-32.

17. Nel A, van Niekerk N, Van Baelen B, et al. Safety, adherence, and HIV-1 seroconversion among women using the dapivirine vaginal ring (DREAM): an open-label, extension study. *The lancet HIV* 2021;8(2):e77-e86. doi: 10.1016/s2352-3018(20)30300-3 [published Online First: 2021/02/05]
18. Kusemererwa S, Abaasa A, Onyango M, et al. Contraceptive preference among women at risk of HIV acquisition in a preparatory screening study for a phase III microbicide trial in South Western Uganda. *AIDS and behavior* 2018;22(1):131-38.
19. CDC. Sexually Transmitted Diseases Treatment Guidelines, 2010.
20. Myer L, Kuhn L, Stein ZA, et al. Intravaginal practices, bacterial vaginosis, and women's susceptibility to HIV infection: epidemiological evidence and biological mechanisms. *The Lancet Infectious diseases* 2005;5(12):786-94. doi: 10.1016/s1473-3099(05)70298-x [published Online First: 2005/11/29]
21. Fonck K, Kaul R, Keli F, et al. Sexually transmitted infections and vaginal douching in a population of female sex workers in Nairobi, Kenya. *Sexually Transmitted Infections* 2001;77(4):271-75.
22. Umami A, Paulik E, Molnár R, et al. The relationship between genital hygiene behaviors and genital infections among women: A systematic review. *Jurnal Ners* 2022;17(1):89-101.
23. Daher A, Albaini O, Siff L, et al. Intimate hygiene practices and reproductive tract infections: A systematic review. *Gynecology and Obstetrics Clinical Medicine* 2022 doi: <https://doi.org/10.1016/j.gocm.2022.06.001>
24. Myer L, Denny L, WRIGHT JR TC, et al. Intravaginal practices, HIV and other sexually transmitted diseases among South African women. *Sexually Transmitted Diseases* 2004:174-79.
25. Austin MN, Meyn LA, Avolia HA, et al. Impact of Dapivirine and Placebo Vaginal Rings on the Microbiota of Adolescent, Lactating, and Postmenopausal Females. *The Journal of infectious diseases* 2022;225(12):2208-18. doi: 10.1093/infdis/jiab590 [published Online First: 2021/12/06]
26. Zuend CF, Noël-Romas L, Hoger S, et al. Influence of dapivirine vaginal ring use on cervicovaginal immunity and functional microbiome in adolescent girls. *AIDS (London, England)* 2021;35(3):369.
27. Nel A, Haazen W, Nuttall J, et al. A safety and pharmacokinetic trial assessing delivery of dapivirine from a vaginal ring in healthy women. *AIDS* 2014;28(10):1479-87. doi: 10.1097/qad.0000000000000280
28. Obiero J, Ogongo P, Mwethera PG, et al. Topical microbicides for preventing sexually transmitted infections. *Cochrane Database of Systematic Reviews* 2021(3)
29. Juarez-Colunga E, Rosenfeld M, Zemanick ET, et al. Application of multiple event analysis as an alternative approach to studying pulmonary exacerbations as an outcome measure. *Journal of Cystic Fibrosis* 2020;19(1):114-18. doi: <https://doi.org/10.1016/j.jcf.2018.12.005>

## STROBE Statement—checklist of items that should be included in reports of observational studies

|                              | Item No | Recommendation                                                                                                                                                                                                                                                                                                                                                                                                                                                         | Page No |
|------------------------------|---------|------------------------------------------------------------------------------------------------------------------------------------------------------------------------------------------------------------------------------------------------------------------------------------------------------------------------------------------------------------------------------------------------------------------------------------------------------------------------|---------|
| <b>Title and abstract</b>    | 1       | (a) Indicate the study's design with a commonly used term in the title or the abstract                                                                                                                                                                                                                                                                                                                                                                                 | 2       |
|                              |         | (b) Provide in the abstract an informative and balanced summary of what was done and what was found                                                                                                                                                                                                                                                                                                                                                                    | 2       |
| <b>Introduction</b>          |         |                                                                                                                                                                                                                                                                                                                                                                                                                                                                        |         |
| Background/rationale         | 2       | Explain the scientific background and rationale for the investigation being reported                                                                                                                                                                                                                                                                                                                                                                                   | 4       |
| Objectives                   | 3       | State specific objectives, including any prespecified hypotheses                                                                                                                                                                                                                                                                                                                                                                                                       | 4       |
| <b>Methods</b>               |         |                                                                                                                                                                                                                                                                                                                                                                                                                                                                        |         |
| Study design                 | 4       | Present key elements of study design early in the paper                                                                                                                                                                                                                                                                                                                                                                                                                | 5       |
| Setting                      | 5       | Describe the setting, locations, and relevant dates, including periods of recruitment, exposure, follow-up, and data collection                                                                                                                                                                                                                                                                                                                                        | 5       |
| Participants                 | 6       | (a) <i>Cohort study</i> —Give the eligibility criteria, and the sources and methods of selection of participants. Describe methods of follow-up<br><i>Case-control study</i> —Give the eligibility criteria, and the sources and methods of case ascertainment and control selection. Give the rationale for the choice of cases and controls<br><i>Cross-sectional study</i> —Give the eligibility criteria, and the sources and methods of selection of participants | 5       |
|                              |         | (b) <i>Cohort study</i> —For matched studies, give matching criteria and number of exposed and unexposed<br><i>Case-control study</i> —For matched studies, give matching criteria and the number of controls per case                                                                                                                                                                                                                                                 | NA      |
| Variables                    | 7       | Clearly define all outcomes, exposures, predictors, potential confounders, and effect modifiers. Give diagnostic criteria, if applicable                                                                                                                                                                                                                                                                                                                               | 5, 6    |
| Data sources/<br>measurement | 8*      | For each variable of interest, give sources of data and details of methods of assessment (measurement). Describe comparability of assessment methods if there is more than one group                                                                                                                                                                                                                                                                                   | 5, 6    |
| Bias                         | 9       | Describe any efforts to address potential sources of bias                                                                                                                                                                                                                                                                                                                                                                                                              | 6, 7    |
| Study size                   | 10      | Explain how the study size was arrived at                                                                                                                                                                                                                                                                                                                                                                                                                              | 5       |
| Quantitative variables       | 11      | Explain how quantitative variables were handled in the analyses. If applicable, describe which groupings were chosen and why                                                                                                                                                                                                                                                                                                                                           | 6, 7    |
| Statistical methods          | 12      | (a) Describe all statistical methods, including those used to control for confounding                                                                                                                                                                                                                                                                                                                                                                                  | 6, 7    |
|                              |         | (b) Describe any methods used to examine subgroups and interactions                                                                                                                                                                                                                                                                                                                                                                                                    | NA      |
|                              |         | (c) Explain how missing data were addressed                                                                                                                                                                                                                                                                                                                                                                                                                            | NA      |
|                              |         | (d) <i>Cohort study</i> —If applicable, explain how loss to follow-up was addressed<br><i>Case-control study</i> —If applicable, explain how matching of cases and controls was addressed<br><i>Cross-sectional study</i> —If applicable, describe analytical methods taking account of sampling strategy                                                                                                                                                              | NA      |
|                              |         | (e) Describe any sensitivity analyses                                                                                                                                                                                                                                                                                                                                                                                                                                  | 6, 7    |

Continued on next page

| <b>Results</b>           |     |                                                                                                                                                                                                              | <b>Page</b>  |
|--------------------------|-----|--------------------------------------------------------------------------------------------------------------------------------------------------------------------------------------------------------------|--------------|
| Participants             | 13* | (a) Report numbers of individuals at each stage of study—eg numbers potentially eligible, examined for eligibility, confirmed eligible, included in the study, completing follow-up, and analysed            | 8, 9         |
|                          |     | (b) Give reasons for non-participation at each stage                                                                                                                                                         | NA           |
|                          |     | (c) Consider use of a flow diagram                                                                                                                                                                           | NA           |
| Descriptive data         | 14* | (a) Give characteristics of study participants (eg demographic, clinical, social) and information on exposures and potential confounders                                                                     | 8, 9         |
|                          |     | (b) Indicate number of participants with missing data for each variable of interest                                                                                                                          | NA           |
|                          |     | (c) <i>Cohort study</i> —Summarise follow-up time (eg, average and total amount)                                                                                                                             |              |
| Outcome data             | 15* | <i>Cohort study</i> —Report numbers of outcome events or summary measures over time                                                                                                                          | 8, 9, 10, 11 |
|                          |     | <i>Case-control study</i> —Report numbers in each exposure category, or summary measures of exposure                                                                                                         |              |
|                          |     | <i>Cross-sectional study</i> —Report numbers of outcome events or summary measures                                                                                                                           |              |
| Main results             | 16  | (a) Give unadjusted estimates and, if applicable, confounder-adjusted estimates and their precision (eg, 95% confidence interval). Make clear which confounders were adjusted for and why they were included | 9            |
|                          |     | (b) Report category boundaries when continuous variables were categorized                                                                                                                                    |              |
|                          |     | (c) If relevant, consider translating estimates of relative risk into absolute risk for a meaningful time period                                                                                             |              |
| Other analyses           | 17  | Report other analyses done—eg analyses of subgroups and interactions, and sensitivity analyses                                                                                                               | NA           |
| <b>Discussion</b>        |     |                                                                                                                                                                                                              |              |
| Key results              | 18  | Summarise key results with reference to study objectives                                                                                                                                                     | 12           |
| Limitations              | 19  | Discuss limitations of the study, taking into account sources of potential bias or imprecision. Discuss both direction and magnitude of any potential bias                                                   | 12           |
| Interpretation           | 20  | Give a cautious overall interpretation of results considering objectives, limitations, multiplicity of analyses, results from similar studies, and other relevant evidence                                   | 13           |
| Generalisability         | 21  | Discuss the generalisability (external validity) of the study results                                                                                                                                        | 13           |
| <b>Other information</b> |     |                                                                                                                                                                                                              |              |
| Funding                  | 22  | Give the source of funding and the role of the funders for the present study and, if applicable, for the original study on which the present article is based                                                | 13           |

\*Give information separately for cases and controls in case-control studies and, if applicable, for exposed and unexposed groups in cohort and cross-sectional studies.

**Note:** An Explanation and Elaboration article discusses each checklist item and gives methodological background and published examples of transparent reporting. The STROBE checklist is best used in conjunction with this article (freely available on the Web sites of PLoS Medicine at <http://www.plosmedicine.org/>, Annals of Internal Medicine at <http://www.annals.org/>, and Epidemiology at <http://www.epidem.com/>). Information on the STROBE Initiative is available at [www.strobe-statement.org](http://www.strobe-statement.org).

# BMJ Open

**Effect of intravaginal practices on incidence of sexually transmitted infections and bacterial vaginosis among women enrolled in the Dapivirine vaginal ring trial (The Ring Study) in southwestern Uganda, a retrospective secondary analysis.**

|                                 |                                                                                                                                                                                                                                                                                                                                                                                                                                                                                                                             |
|---------------------------------|-----------------------------------------------------------------------------------------------------------------------------------------------------------------------------------------------------------------------------------------------------------------------------------------------------------------------------------------------------------------------------------------------------------------------------------------------------------------------------------------------------------------------------|
| Journal:                        | <i>BMJ Open</i>                                                                                                                                                                                                                                                                                                                                                                                                                                                                                                             |
| Manuscript ID                   | bmjopen-2023-079497.R1                                                                                                                                                                                                                                                                                                                                                                                                                                                                                                      |
| Article Type:                   | Original research                                                                                                                                                                                                                                                                                                                                                                                                                                                                                                           |
| Date Submitted by the Author:   | 07-Dec-2023                                                                                                                                                                                                                                                                                                                                                                                                                                                                                                                 |
| Complete List of Authors:       | Kusemererwa, Sylvia; MRC/UVRI and LSHTM Uganda Research Unit Ruzagira, Eugene; MRC/UVRI and LSHTM Uganda Research Unit; London School of Hygiene & Tropical Medicine Faculty of Epidemiology and Population Health<br>Onyango, Martin; MRC/UVRI and LSHTM Uganda Research Unit Kabarambi, Anita; International Centre for Child Health and Development<br>Abaasa, Andrew; MRC/UVRI and LSHTM Uganda Research Unit, Statistics & Data Science; London School of Hygiene & Tropical Medicine, Infectious Disease Epidemiology |
| <b>Primary Subject Heading</b>: | Public health                                                                                                                                                                                                                                                                                                                                                                                                                                                                                                               |
| Secondary Subject Heading:      | Sexual health                                                                                                                                                                                                                                                                                                                                                                                                                                                                                                               |
| Keywords:                       | Public health < INFECTIOUS DISEASES, Sexually Transmitted Disease, HIV & AIDS < INFECTIOUS DISEASES, Epidemiology < INFECTIOUS DISEASES                                                                                                                                                                                                                                                                                                                                                                                     |
|                                 |                                                                                                                                                                                                                                                                                                                                                                                                                                                                                                                             |

SCHOLARONE™  
Manuscripts



I, the Submitting Author has the right to grant and does grant on behalf of all authors of the Work (as defined in the below author licence), an exclusive licence and/or a non-exclusive licence for contributions from authors who are: i) UK Crown employees; ii) where BMJ has agreed a CC-BY licence shall apply, and/or iii) in accordance with the terms applicable for US Federal Government officers or employees acting as part of their official duties; on a worldwide, perpetual, irrevocable, royalty-free basis to BMJ Publishing Group Ltd ("BMJ") its licensees and where the relevant Journal is co-owned by BMJ to the co-owners of the Journal, to publish the Work in this journal and any other BMJ products and to exploit all rights, as set out in our [licence](#).

The Submitting Author accepts and understands that any supply made under these terms is made by BMJ to the Submitting Author unless you are acting as an employee on behalf of your employer or a postgraduate student of an affiliated institution which is paying any applicable article publishing charge ("APC") for Open Access articles. Where the Submitting Author wishes to make the Work available on an Open Access basis (and intends to pay the relevant APC), the terms of reuse of such Open Access shall be governed by a Creative Commons licence – details of these licences and which [Creative Commons](#) licence will apply to this Work are set out in our licence referred to above.

Other than as permitted in any relevant BMJ Author's Self Archiving Policies, I confirm this Work has not been accepted for publication elsewhere, is not being considered for publication elsewhere and does not duplicate material already published. I confirm all authors consent to publication of this Work and authorise the granting of this licence.

1  
2  
3 **Effect of intravaginal practices on incidence of sexually transmitted infections and**  
4 **bacterial vaginosis among women enrolled in the Dapivirine vaginal ring trial (The Ring**  
5 **Study) in southwestern Uganda, a retrospective secondary analysis.**  
6  
7  
8  
9

10 **Authors:** Sylvia Kusemererwa<sup>1\*</sup>, Eugene Ruzagira<sup>1,3</sup>, Martin Onyango<sup>1</sup>, Anita Kabarambi<sup>4</sup>,  
11 Andrew Abaasa<sup>2,3</sup>  
12  
13

14  
15  
16 **Institution**  
17

18  
19 <sup>1</sup>Department of viral pathogen epidemiology and interventions, Medical Research Council/  
20 Uganda Virus Research Institute and London School of Hygiene and Tropical Medicine, Uganda  
21 Research Unit, Entebbe, Uganda  
22  
23

24  
25 <sup>2</sup>Department of statistics, Medical Research Council/ Uganda Virus Research Institute and  
26 London School of Hygiene and Tropical Medicine, Uganda Research Unit, Entebbe, Uganda  
27  
28

29 <sup>3</sup> Department of infectious diseases epidemiology, London School of Hygiene & Tropical  
30 Medicine, London, UK  
31  
32

33 <sup>4</sup> Department of research, International Center for Child Health and Development, Masaka,  
34 Uganda  
35  
36  
37  
38  
39  
40  
41

42 Correspondence to: Sylvia Kusemererwa, <sup>1</sup>Medical Research Council/Uganda Virus Research  
43 Institute (MRC/UVRI) and London School of Hygiene and Tropical Medicine (LSHTM),  
44 Uganda Research Unit, Plot 51-59, Nakiwogo Road, P.O Box 49 Entebbe, Uganda. Phone: 256  
45 (0) 417 704000, or 256 (0) 70229100. [Sylvia.Kusemererwa@mrcuganda.org](mailto:Sylvia.Kusemererwa@mrcuganda.org) or  
46 [kansykarus@gmail.com](mailto:kansykarus@gmail.com)  
47  
48  
49  
50  
51  
52  
53  
54  
55  
56  
57  
58  
59  
60

1  
2  
3 **Effect of intravaginal practices on incidence of sexually transmitted infections and**  
4 **bacterial vaginosis among women enrolled in the Dapivirine vaginal ring trial (The Ring**  
5 **Study) in southwestern Uganda, a retrospective secondary analysis.**  
6  
7  
8  
9

10 **Abstract**

11  
12 **Objectives:** We assessed the effect of intravaginal practices (IVP) on the incidence of sexually  
13 transmitted infections (STIs) and bacterial vaginosis (BV) among women using the dapivirine  
14 vaginal ring (DVR) or placebo vaginal ring in southwestern Uganda.  
15  
16

17  
18 **Methods:** This was a retrospective secondary analysis of data collected from women at risk of  
19 HIV infection in The Ring Study. The Ring Study evaluated the safety and efficacy of the DVR  
20 between 2013 and 2016. At baseline, a behavioral questionnaire was administered to obtain  
21 information on sexual activity and IVP (exposure) defined as; insertion inside the vagina of any  
22 items aimed at cleaning the vagina for any reason before, during or after sex other than practices  
23 to manage menses. Each participant self-inserted the DVR/placebo and replaced it every 4weeks  
24 for 2 years. Outcomes were diagnosis of STIs i.e., *Chlamydia trachomatis* (CT), *Neisseria*  
25 *gonorrhoea* (NG), *Trichomonas vaginalis* (TV), HIV and BV. The incidence rate of STI/BV was  
26 estimated, overall, by IVP and trial arm in single-event-per-participant and multiple-event-per-  
27 participant analyses.  
28  
29  
30  
31  
32  
33  
34  
35

36 **Results:** Of the 197 women enrolled, 66 (33.5%) were <25 years of age. Overall, 93 (47.2%)  
37 practiced at least one form of IVP. During follow up, 172 (87.3%) women were diagnosed with an  
38 STI/BV at least once. Majority had TV (73.6%, n=145). Overall rate of STI/BV was 51.9/100  
39 person-years, 95% confidence interval (CI): 44.7-60.3 [IVP: Yes, 51.0 (40.8-63.8) vs. No, 52.6  
40 (43.0-64.4)]. IVP were not statistically significantly associated with rate of individual STIs/BV.  
41  
42  
43  
44  
45 Similar results were observed when the analyses were conducted separately for each trial arm.  
46

47 **Conclusions:** IVP had no effect on the risk of STIs/BV in The Ring Study.  
48  
49  
50

51 **Key words:** Intravaginal practices, sexually transmitted infection, Bacterial vaginosis,  
52 Dapivirine, Vaginal Ring, Uganda  
53  
54  
55  
56  
57  
58  
59  
60



### Study strengths and limitations

- The study was able to investigate multiple STIs and BV in the same population.
- The longitudinal nature of the study allowed for both single-event-per-participant and multiple-event-per-participant analyses.
- Extensive analyses were to some extent limited by a small sample size.
- Tests to confirm absence of STI/BV prior to DVR insertion were not done.

For peer review only

## INTRODUCTION

Sexually transmitted infections (STIs) remain a health challenge globally. In 2018, WHO estimated that nearly one million people become infected every day with a curable STI caused by: *Chlamydia trachomatis* (CT), *Neisseria gonorrhoea* (NG), Syphilis or *Trichomonas vaginalis* (TV) [1]. STIs disproportionately affect low-and-middle-income countries, with 90% of the new infections occurring in these countries [2]. Women in sub-Saharan Africa have a high prevalence of STIs, particularly those at high risk of HIV infection also having a high STI burden [3, 4]. Bacterial vaginosis (BV), a common vaginal condition has also been associated with increased risk of STIs and HIV infection [5]. High rates (37% to 68%) of BV have been reported among women in Southern and East Africa [6].

BV results from variation in normal vaginal flora attributed to reduction in the prevalence of Lactobacilli (dominant species in healthy vaginal environment) and an increase in the concentration of pathogenic organisms: *G. vaginalis*, *Bacteroides (Prevotella)* species, *Mobiluncus* species, and *Mycoplasma hominis* [7, 8]. Increasing evidence shows that vaginal microbiota may play a role in mediating susceptibility to STIs. Vaginal Lactobacilli utilize several actions to protect against colonization by genital pathogens [9]. These include production of lactic acid that supports the maintenance of a lower vaginal pH, which may prevent pathogen growth [10], and exposure to hydrogen peroxide that has been shown to decrease activity of BV and other genital tract organisms [11, 12].

The high prevalence and increased risk of acquisition of STIs/BV and HIV has been associated with vaginal practices [13]. These practices include various behaviors used to maintain health, wellness, and enhance sexual pleasure [14-16]. The World Health Organization (WHO) has suggested seven classifications for vaginal practices: external washing, intravaginal cleansing, external application, intravaginal insertion, oral ingestion, vaginal streaming or smoking and anatomical modification [17]. On the other hand, intravaginal practices (IVPs) refer to both intravaginal cleansing (cleaning or washing inside the vagina with fingers or substances like soap to remove fluids), and intravaginal insertion (placing something inside the vagina, like powders, creams, herbs, or tissue) [18, 19].

1  
2  
3 Soaps, detergents and antiseptics used to cleanse inside the vagina can cause chemical  
4 damage and increase vaginal pH resulting in overgrowth of BV related organisms, which has also  
5 been associated with increased risk of HIV acquisition [19, 20]. Other products have also been  
6 reported to cause genital lesions, and swellings, creating favorable conditions for the transmission  
7 of STIs, including HIV [17]. Items like cloth commonly used in some communities to clean the  
8 vagina repeatedly might also act as fomites, carrying TV organisms [21]. TV has also been  
9 associated with increased risk of HIV acquisition [22, 23]. These practices which increase a  
10 woman's susceptibility to HIV could reduce the effectiveness of vaginal microbicides [24, 25].  
11  
12  
13  
14  
15  
16  
17

18 The monthly dapivirine vaginal ring (DVR) microbicide, a female controlled HIV  
19 prevention tool, was found to reduce the risk of HIV acquisition by approximately 30% in two  
20 phase 3 trials [26, 27]. With continued and consistent use, the risk of HIV acquisition was even  
21 lower (62%) in an open-label extension trial [28]. However, data are limited on the effect of IVP  
22 on vaginal flora and risk of STIs/BV among women using the DVR. We assessed the effect of IVP  
23 on the incidence of STIs including HIV, and BV among women using the DVR or placebo vaginal  
24 ring in southwestern Uganda.  
25  
26  
27  
28  
29  
30  
31

## 32 **METHODS**

### 33 **Study design**

34  
35 This was a retrospective secondary analysis using data collected in The Ring Study, a phase 3  
36 microbicide trial [26].  
37  
38  
39  
40

### 41 **Study setting and population**

42  
43 Details of the Ring Study (Registration number: NCT01539226) have been described elsewhere  
44 [26]. Briefly, The Ring Study was a multicenter microbicide trial, that evaluated the safety and  
45 efficacy of the DVR between 2013 and 2016 in Uganda and South Africa. The study was  
46 sponsored by the International Partnership for Microbicides. In Uganda, the study was conducted  
47 by the Medical Research Council (MRC)/Uganda Virus Research Institute (UVRI) and London  
48 School of Hygiene and Tropical Medicine (LSHTM) Uganda Research Unit in Masaka,  
49 southwestern Uganda. The site recruited women at high risk of HIV infection from towns along  
50 the trans-African highway and the shores of Lake Victoria. Details of the recruitment procedures  
51  
52  
53  
54  
55  
56  
57

1  
2  
3 and study population have been described elsewhere [29]. Briefly, the research site enrolled 197  
4 women (18-45years of age) at high risk of HIV infection. Women were identified from sex work  
5 hotspots (bars, restaurants, hair salons, small shops, and other small-scale businesses). High risk  
6 was defined by presence of any two of the following: i) history of STIs in the past three months;  
7 ii) self-reported condom less sex with multiple sex partners or a new partner in the past three  
8 months; and iii) use of recreational drugs (marijuana, alcohol) in the past three months. Of the  
9 women enrolled, two in five were working in bars and restaurants and nearly a third had small  
10 scale businesses. A woman was included in the main study if they were not pregnant, not  
11 breastfeeding, asymptomatic for genital infections and tested HIV negative at the time of  
12 enrolment. Those diagnosed with any clinically significant curable STI, were initiated on treatment  
13 and only enrolled after completing a full course of treatment.  
14  
15  
16  
17  
18  
19  
20  
21  
22  
23

### 24 **Study procedures**

25  
26 Participants consented for screening and enrolment on two separate occasions. At the first visit  
27 (screening), data on demographics, inclusion and exclusion criteria were obtained. A physical and  
28 genital examination was done. All potential participants were provided with HIV/STI risk-  
29 reduction counselling and HIV pre- and post-test counselling. At the second visit (enrolment),  
30 women who met all inclusion criteria and no exclusion criteria, had a normal pelvic examination,  
31 and negative HIV rapid tests were enrolled into the trial. Eligible women were randomised in a 2:1  
32 ratio to either the DVR arm or placebo arm. At the enrolment visit, an interviewer-administered  
33 behavioral questionnaire was used to obtain baseline information on sexual activity and vaginal  
34 practices. At 4 weeks post-enrolment and every 24 weeks thereafter for the next 2 years, follow-  
35 up data on vaginal practices were collected using an interviewer-administered behavioral  
36 questionnaire. Participants self-inserted a vaginal ring every 4 weeks for up to 104 weeks.  
37  
38  
39  
40  
41  
42  
43  
44  
45  
46

47  
48 **Measurement of exposure [intravaginal practices (IVP)]:** IVP was defined as insertion inside  
49 the vagina of any items aimed at cleaning the vagina for any reason before, during or after sex  
50 other than practices to manage menses. Items included: materials such as paper, cloth, or cotton  
51 wool; water only; water and soap; fingers to clean or insert something. Women were asked if they  
52 were inserting or using any of the aforementioned items inside the vagina to clean their vagina  
53  
54  
55  
56  
57  
58  
59  
60

1  
2  
3 either as a general cleaning/hygiene practice before or after sex or to prepare the vagina for sex in  
4 the past, at baseline and every 24 weeks.  
5  
6  
7

8 **Measurement of outcome (diagnosis of STIs/BV):** Cervico-vaginal swabs were collected at the  
9 first screening visit and every 12 weeks (3 months) for 2 years. The swabs were tested for TV  
10 (OSOM® Trichomonas Rapid test- Sekisui Diagnostics, LLC, USA) and CT/NG (Cobas®  
11 Amplicor CT/NG -PCR test, Roche Diagnostic Systems, Branchburg, New Jersey). Vaginal fluid  
12 samples were also collected by trained clinicians using sterile swabs for assessment of vaginal  
13 flora (using Nugent's score) and vaginal fluid pH at the enrolment visit (prior to ring insertion)  
14 and every 12 weeks. Samples with a score of  $\geq 7$  were classified as BV present. Each slide was  
15 scored by trained laboratory technologists. For internal quality control, a single batch of slides  
16 were re-examined by an independent reader weekly. Discrepant results were resolved by expert  
17 consensus. External quality control was assured using College of American Pathologists Vaginitis  
18 screen, vaginal gram stain-VS2 as part of the site standard operating procedures.  
19  
20  
21  
22  
23  
24  
25  
26  
27

28 Participants were tested for HIV at the screening and enrolment visit using whole blood  
29 samples collected by venipuncture. Serial rapid HIV antibody tests were done using Alere  
30 Determine™ HIV-1/2 (Alere, Medical co., Ltd, Matsuhidai, Matsudo-shi, Chiba, Japan) followed  
31 by OraQuick- ADVANCE® Rapid HIV-1/2 Test (OraQuick-OraSure Technologies Inc,  
32 Pennsylvania) to confirm a positive Determine result and Uni- Gold™ HIV (Trinity Biotech,  
33 Ireland) as the tie breaker. At the screening/enrolment visits, a participant was confirmed to have  
34 HIV infection if they tested positive on at least two rapid HIV antibody tests. Post-enrolment, HIV  
35 testing was done serially as described above. However, for participants who tested positive or  
36 discordant on two rapid HIV antibody tests, a confirmatory test on stored plasma was done using  
37 Western Blot (J. Mitra and Co.Pvt. ltd, India) as previously described. Blood samples were  
38 collected, and plasma stored every 4 weeks. Stored plasma samples for participants with confirmed  
39 HIV infection were retrospectively tested at a central laboratory in South Africa (Bioanalytical  
40 Research Corporation) for HIV ribonucleic acid (RNA) copies (viral load) using the polymerase-  
41 chain-reaction (PCR) assay [26].  
42  
43  
44  
45  
46  
47  
48  
49  
50  
51  
52  
53

## 54 **Statistical analysis**

55  
56  
57  
58  
59  
60

1  
2  
3 Data analyses were performed in Stata version 15.0 (Stata Corp, College Station, TX, USA).  
4 Participants' baseline characteristics were summarized using frequencies and percentages overall  
5 and by IVP status. We determined the proportion of participants that were positive for a given  
6 STI/BV (event) as the number who tested positive for an STI/BV at least once during the study  
7 divided by the total number tested. We determined the effect of IVP on the incidence of each  
8 STI/BV, by estimating the rate of STI/BV overall and stratified by IVP status. We used two  
9 approaches for measuring the rate of STI/BV; (a) a single-event-per-participant (allowing for one  
10 event per participant-first STI/BV event) and (b) a multiple-event-per-participant (allowing for  
11 two or more STI/BV events for the same participant) since these are recurrent events. The  
12 incidence rate of a given STI/BV was estimated as the number of participants who tested positive  
13 for STI/BV divided by the person-time (years) at risk (pyr) expressed as per 100 pyr. PYR were  
14 estimated as a sum of the time from enrolment into the trial (those negative at baseline) to the date  
15 of trial completion or censoring (stopped trial visits or ring use). Participants that tested positive  
16 for STI/BV at baseline were given treatment and started to contribute person-time after completing  
17 the course of treatment. We further adjusted the effect of IVP on rate of STI/BV for age and  
18 baseline STI/BV status by fitting Poisson regression models. In the analysis, we used Poisson  
19 regression model with time-varying covariates, allowing for intergroup correlation (because  
20 women had multiple records) by using robust standard errors. For HIV, we estimated the rate of  
21 HIV infection as number of HIV positive cases divided by the total person years at risk expressed  
22 as per 100 person years at risk in a single-event-per-participant survival analysis. Person time at  
23 risk were calculated as sum of the time from enrolment to the last HIV seronegative date or to the  
24 estimated date of HIV infection. The HIV infection date was estimated as a random date between  
25 the last HIV seronegative and the first HIV+ result date in a multiple imputation.  
26  
27  
28  
29  
30  
31  
32  
33  
34  
35  
36  
37  
38  
39  
40  
41  
42  
43  
44

### 45 **Compliance with Ethical Standards**

46  
47 Approval was obtained from the Uganda Virus Research Institute Research Ethics Committee  
48 (Ref#-GC/127/13/03/33), the Uganda National Council of Science and Technology (Ref#-  
49 HS1362) and the National Drug Authority (Ref#-166/ESR/NDA/DID-07/2013). Written informed  
50 consent was obtained from each woman before any study procedures were performed. Women  
51 who tested HIV-positive were referred to an HIV care provider of their choice. Treatment was  
52  
53  
54  
55  
56  
57  
58  
59  
60

provided to those who tested positive for STIs/BV according to the Centers for Disease Control and Prevention (CDC) STD Treatment guidelines 2010 [30].

### **Patient and Public Involvement Statement**

Communities where the study was conducted were involved from the inception of the study. Community gate keepers: Local Council leaders, political leaders, village health teams, community based and faith-based organizations were informed of the study via various engagement meetings prior to study start. The site Community Advisory Board (CAB) members were engaged to review study documents, consent and other study literacy documents and confirm translations to the local language. CAB members were compensated for all the activities that they engaged in. Volunteer recruitment and retention was supported by local leaders. Results were disseminated to study participants, the CAB, and community members through community meetings upon study completion and presentations at national and international meetings, seminars and conferences. All stakeholders were compensated for the time spent during engagement meetings.

## **RESULTS**

### **Baseline socio-demographic characteristics**

In total, 197 women enrolled, 67% on the DVR trial arm. Of those, 66 (33.5%) were less than 25 years of age, 82 (41.6%) were married and very few 24 (12.2%) had secondary school education. Majority, 162 (82.2%) reported having a main partner but only 75 (46.3%) lived with this partner (Table 1). About a half, 100 (50.8%) tested positive for an STI/ BV at baseline. Compared with those who had one episode of STI/BV, participants with two or more episodes were likely to be single and never married (47.8% vs. 35.6%), not currently living with a main partner (56.5% vs. 37.5%,  $p=0.033$ ) and inconsistently living with the main partner in the past year (69.6% vs. 41.7%;  $p=0.001$ ) but otherwise similar in regard to other participant characteristics.

**Table 1: Baseline socio-demographic characteristics of 197 women enrolled in The Ring Study in southwestern Uganda between 2013 and 2016**

| Variable                                   | All<br>n (%) | Intravaginal practices |              | p-value |
|--------------------------------------------|--------------|------------------------|--------------|---------|
|                                            |              | No<br>n (%)            | Yes<br>n (%) |         |
| Overall                                    | 197          | 104 (52.8)             | 93 (47.2)    |         |
| Trial arm                                  |              |                        |              | 0.835   |
| Dapivirine vaginal ring                    | 132 (67.0)   | 69 (52.3)              | 63 (47.7)    |         |
| Placebo                                    | 65 (33.0)    | 35 (53.8)              | 30 (46.2)    |         |
| Age (years)                                |              |                        |              | 0.275   |
| 18-24                                      | 66 (33.5)    | 30 (45.4)              | 36 (54.6)    |         |
| 25-34                                      | 98 (49.8)    | 57 (58.2)              | 41 (41.8)    |         |
| 35+                                        | 33 (16.7)    | 17 (51.5)              | 16 (48.5)    |         |
| Education level                            |              |                        |              | 0.276   |
| Incomplete primary school                  | 68 (34.5)    | 37 (54.4)              | 31 (45.6)    |         |
| Complete primary school                    | 105 (53.3)   | 58 (55.2)              | 47 (44.8)    |         |
| Secondary school*                          | 24 (12.2)    | 9 (37.5)               | 15 (62.5)    |         |
| Marital status                             |              |                        |              | 0.020   |
| Single and never married                   | 90 (45.7)    | 38 (42.2)              | 52 (57.8)    |         |
| Single but previously married              | 25 (12.7)    | 14 (56.0)              | 11 (44.0)    |         |
| Married                                    | 82 (41.6)    | 52 (63.4)              | 30 (36.6)    |         |
| Number of lifetime sex partners            |              |                        |              | 0.002   |
| Median (IQR)                               | 6 (4-12)     | 5 (3-9)                | 8 (5-20)     |         |
| Has main partner                           |              |                        |              | 0.194   |
| No                                         | 35 (17.8)    | 15 (42.9)              | 20 (57.1)    |         |
| Yes                                        | 162 (82.2)   | 89 (54.9)              | 73 (45.1)    |         |
| Duration lived with main partner (years)   |              |                        |              | 0.690   |
| <1                                         | 35 (21.6)    | 17 (48.6)              | 18 (51.4)    |         |
| 1-2                                        | 34 (21.0)    | 19 (55.9)              | 15 (44.1)    |         |
| 3+                                         | 93 (57.4)    | 53 (57.0)              | 40 (43.0)    |         |
| Lived with (main) partner in the past year |              |                        |              | 0.171   |
| All the time                               | 48 (37.8)    | 38 (61.3)              | 24 (38.7)    |         |
| Some of the time                           | 14 (11.0)    | 7 (36.8)               | 12 (63.2)    |         |
| No                                         | 65 (51.2)    | 44 (54.3)              | 37 (45.7)    |         |
| Currently lives with main partner          |              |                        |              | 0.376   |
| No                                         | 87 (53.7)    | 45 (51.7)              | 42 (48.3)    |         |
| Yes                                        | 75 (46.3)    | 44 (58.7)              | 31 (41.3)    |         |
| Baseline STI/BV status                     |              |                        |              |         |
| TV                                         |              |                        |              |         |
| Negative                                   | 121 (61.4)   | 61 (50.4)              | 60 (49.6)    | 0.399   |
| Positive                                   | 76 (38.6)    | 43 (56.6)              | 33 (43.4)    |         |
| NG                                         |              |                        |              |         |
| Negative                                   | 173 (87.8)   | 92 (53.2)              | 81 (46.8)    | 0.770   |
| Positive                                   | 24 (12.2)    | 12 (50.0)              | 12 (50.0)    |         |
| CT                                         |              |                        |              |         |
| Negative                                   | 177 (89.8)   | 97 (54.8)              | 80 (45.2)    | 0.093   |
| Positive                                   | 20 (10.2)    | 7 (35.0)               | 13 (65.0)    |         |



|          |            |            |           |       |
|----------|------------|------------|-----------|-------|
| BV       |            |            |           |       |
| Negative | 191 (96.9) | 102 (53.4) | 89 (46.6) | 0.332 |
| Positive | 6 (3.1)    | 2 (33.3)   | 4 (66.7)  |       |

n=Number; \*Includes one woman who had greater than secondary education, TV- *Trichomonas vaginalis*, NG-*Neisseria gonorrhoea*, CT-*Chlamydia trachomatis*, BV-Bacterial vaginosis

### Proportion of women reporting intravaginal practices (IVP)

Ninety-three (47.2%) women reported at least one form of IVP. The commonly used substances to clean the vagina included: soap (n=76, 81.7%), cloth (n=5, 5.4%), and others (honey, herbs, perfume n=12, 12.9%). Reported IVP were more common among single and never married women compared to single but previously married or currently married women (p=0.020) and among those with more sex partners (p=0.002) (Table 1).

### Proportion and rate of STIs/BV

A total of 172 (87.3%) women were diagnosed with an STI/BV at least once during follow up, with an overall incidence rate of 51.9 per 100 pyrs. The overall incidence rate for HIV was 5.8 per 100 pyrs. The most common STI was TV (73.6%, n=145/197 diagnosed at least once) with a rate of 92.7 per 100 pyrs and 88.9 per 100 pyrs in the single-event-per-participant and multiple-events-per-participant analysis respectively (Table 2).

### Effect of IVP on rate of STIs/BV

In the single-event-per-participant analysis, STI/BV and HIV rates were not associated with reported IVP (Table 2). However, in the multiple-events-per participant analysis, the rate of CT was statistically significantly lower among women who reported IVP versus those who did not (p=0.030). After adjusting for participant baseline characteristics, overall, in both the single-event and multiple-event per participant analyses, IVP was not associated with any significant change in STI/BV or HIV rates (Table 3). There was no statistically significant effect of IVP use on the rates of STIs/BV and HIV among women using the DVR compared to placebo.

**Table 2: Effect of intravaginal practices on rate of sexually transmitted infection/Bacterial vaginosis among women in the Ring Study in southwestern Uganda**

| Sexually transmitted infection/condition | Single-event-per-participant analysis |                              |                             |         |                  |                  |
|------------------------------------------|---------------------------------------|------------------------------|-----------------------------|---------|------------------|------------------|
|                                          | Overall<br>Rate/100 PYR (95% CI)      | Intravaginal practices       |                             | p-value | uRR (95% CI)     | aRR (95% CI)     |
|                                          |                                       | Yes<br>Rate/100 PYR (95% CI) | No<br>Rate/100 PYR (95% CI) |         |                  |                  |
| HIV                                      | 5.8 (3.0-11.1)                        | 7.0 (2.9-17.0)               | 4.7 (1.8-12.4)              | 0.278   |                  |                  |
| <i>Trichomonas vaginalis</i>             | 92.7 (78.7-109.0)                     | 97.4 (76.9-123.3)            | 88.7 (70.9-111.1)           | 0.288   | 1.10 (0.79-1.52) | 1.10 (0.67-1.63) |
| <i>Neisseria gonorrhoea</i>              | 23.4 (18.3-29.9)                      | 22.8 (15.9-32.9)             | 23.8 (17.0-33.4)            | 0.435   | 0.96 (0.58-1.57) | 0.99 (0.56-1.79) |
| <i>Chlamydia trachomatis</i>             | 28.4 (22.7-35.6)                      | 27.9 (20.2-38.8)             | 28.9 (21.2-39.4)            | 0.446   | 0.97 (0.62-1.52) | 0.83 (0.50-1.38) |
| Bacterial vaginosis                      | 14.1 (10.6-18.6)                      | 13.4 (8.9-20.4)              | 14.7 (10.1-21.4)            | 0.383   | 0.92 (0.52-1.61) | 1.13 (0.53-2.37) |
| Multiple-events-per-participant analysis |                                       |                              |                             |         |                  |                  |
| <i>Trichomonas vaginalis</i>             | 88.9 (79.6-99.5)                      | 90.2 (76.8-106.0)            | 87.9 (75.3-102.5)           | 0.406   | 1.03 (0.77-1.37) | 1.07 (0.80-1.43) |
| <i>Neisseria gonorrhoea</i>              | 28.4 (23.3-34.6)                      | 28.7 (21.5-38.1)             | 28.2 (21.5-37.0)            | 0.935   | 1.02 (0.61-1.69) | 0.99 (0.59-1.67) |
| <i>Chlamydia trachomatis</i>             | 43.6 (37.2-51.1)                      | 36.6 (28.4-47.1)             | 49.9 (40.7-61.2)            | 0.030   | 0.73 (0.45-1.20) | 0.64 (0.38-1.05) |
| Bacterial vaginosis                      | 18.8 (11.1-31.7)                      | 12.1 (4.5-32.2)              | 24.1 (13.0-44.8)            | 0.124   | 0.51 (0.13-1.95) | 0.48 (0.16-1.47) |

PYR = person-years at risk; CI = Confidence interval; uRR = unadjusted rate ratio; aRR = adjusted rate ratio; †Adjusted for age, trial arm, STI/BV at baseline

**Table 3: Effect of intravaginal practices on rate of sexually transmitted infection/Bacterial vaginosis stratified by trial arm among women in the Ring Study in southwestern Uganda**

| Single-event-per-participant analysis    |         |                       |                       |         |                       |                           |
|------------------------------------------|---------|-----------------------|-----------------------|---------|-----------------------|---------------------------|
| Sexually transmitted infection/condition | Overall | Trial arm             |                       | p-value | aRR (DVR)<br>(95% CI) | aRR (Placebo)<br>(95% CI) |
|                                          |         | DVR                   | Placebo               |         |                       |                           |
|                                          | IVP     | Rate/100 PYR (95% CI) | Rate/100 PYR (95% CI) |         |                       |                           |
| HIV                                      | Yes     | 5.6 (2.5-12.4)        | 6.1 (2.0-18.9)        | 0.439   |                       |                           |
| <i>Trichomonas vaginalis</i>             | Yes     | 105.8 (79.7-140.4)    | 82.4 (53.7-126.4)     | 0.171   | 1.34 (0.78-2.31)      | 0.59 (0.28-1.26)          |
| <i>Neisseria gonorrhoea</i>              | Yes     | 20.6 (13.0-32.6)      | 28.0 (15.5-50.5)      | 0.211   | 0.73 (0.35-1.53)      | 1.88 (0.49-7.20)          |
| <i>Chlamydia trachomatis</i>             | Yes     | 29.7 (20.2-43.6)      | 24.3 (13.1-45.2)      | 0.305   | 1.09 (0.60-2.00)      | 0.37 (0.11-1.36)          |
| Bacterial vaginosis                      | Yes     | 12.6 (7.5-21.3)       | 15.2 (7.6-30.3)       | 0.332   | 0.74 (0.26-2.09)      | 1.51 (0.35-6.52)          |
| Multiple-events-per-participant analysis |         |                       |                       |         |                       |                           |
| <i>Trichomonas vaginalis</i>             | Yes     | 94.4 (77.9-114.2)     | 81.5 (60.5-109.9)     | 0.213   | 1.12 (0.80-1.56)      | 0.76 (0.44-1.30)          |
| <i>Neisseria gonorrhoea</i>              | Yes     | 25.2 (17.4-36.4)      | 36.0 (23.0-56.5)      | 0.116   | 0.74 (0.42-1.30)      | 2.24 (0.61-8.31)          |
| <i>Chlamydia trachomatis</i>             | Yes     | 40.4 (30.2-54.2)      | 28.4 (17.1-47.2)      | 0.126   | 0.75 (0.43-1.29)      | 0.33 (0.14-0.78)          |
| Bacterial vaginosis                      | Yes     | 12.5 (4.0-38.7)       | 11.1 (1.6-78.7)       | 0.491   | 0.64 (0.11-3.71)      | 0.39 (0.10-2.72)          |

PYR = person-years at risk; CI = Confidence interval; uRR = unadjusted rate ratio; aRR = adjusted rate ratio; †Adjusted for age, and STI/BV at baseline

## DISCUSSION

Our study aimed to assess the effect of IVP on the incidence of STIs including HIV, and BV among women using the DVR or placebo. Overall, we found that nearly one in every two women practiced at least one form of IVP. IVP is reported to be high in African women with proportions of between 30-50%, and even higher among women at high risk of acquiring HIV [31, 32]. Generally, IVP in this population are driven by cultural and social norms as well as the need for personal hygiene in relation to sexual health and relationships [33]. Women recruited in our study were those engaging in transactional sex and are thus expected to present themselves to their male partners in a fresh vaginal state [34, 35]. The frequency of IVP amongst women involved in transactional sex may be influenced by the need to remain clean/fresh coupled with worries about HIV infection. Prior studies in Uganda and Tanzania showed that a higher frequency of sex was associated with more frequent engagement with IVP [25, 36, 37].

The prevalence of STIs/BV in our study population was high confirming the fact that the women were at very high risk of HIV infection. More events were reported among single women and those who did not live with a main partner and those with more sex partners. Women at high risk of HIV infection engage in transactional sex and have multiple partners, that puts them at higher risk of acquiring STIs/BV. Those who were single also engaged more in IVP. Earlier studies showed that women engaging in high frequency of sex require to present themselves as clean to their male partners [14, 34]. IVP is generally practiced for hygiene purposes and sexuality [15, 16]. IVP has been associated with changes in vaginal flora and resulting BV. The latter is associated with increased susceptibility to STIs including HIV [17]. The interaction between BV and STIs including HIV has been well documented with each causing genital inflammation [38]. It is reported that organisms associated with BV may overgrow due to increased vaginal pH brought about by substances that may be used for IVP like soaps which most of the women in our study used. With increased vaginal pH, the protective Lactobacilli species are replaced by pathogenic organisms resulting in BV [19, 20]. The products used may cause genital lesions enabling the transmission of STIs [17].

We observed a high incidence of STIs in this population, with the commonest STI being TV. TV is reported to be prevalent among women engaging in transactional sex with high proportions reported globally (16%) and the African region contributing even higher proportions (23%) [39]. TV has also been associated with BV especially among women that use cloth for IVP as these act as fomites

1  
2  
3 [21]. Although the STI incidence was high, we did not see any significant difference in the incidence of  
4 STIs/BV among women using IVP compared to those who did not, except for CT that was lower. It is  
5 not clear and has not been documented that IVP reduces the risk of acquiring STIs/BV, though the reverse  
6 has been reported. IVP causes changes to vaginal flora resulting in increased risk of STIs/BV including  
7 HIV. A recent systematic review found that IVP increased the risk of vaginal infections (BV, TV, and  
8 vulvovaginal candidiasis) [40] while two others found no association between IVP and TV [15] or BV  
9 [41]. One study in South Africa found that IVP was associated with increased risk of HIV infection but  
10 not other STIs [42]. Organisms related with BV have been associated with the production of metabolites  
11 that are used by STIs like CT as growth factors enabling their multiplication [43]. However, production  
12 of glycogen by genital epithelial cells, provides energy for *Lactobacillus* species to flourish [44]. These  
13 species may provide for protection against organisms like CT [45]. In vitro studies using substances that  
14 lower vaginal pH has resulted in reduction in susceptibility to CT organisms [44]. It is not clear if the  
15 products the women used in our study could have reduced vaginal pH and thus provided some protection  
16 against CT.  
17  
18  
19  
20  
21  
22  
23  
24  
25  
26

27  
28 We also found that there was no statistically significant effect of the DVR microbicide or  
29 placebo on STI/BV including HIV rates among those using IVP. The DVR has been associated with  
30 minimal changes in the vaginal microbiota that were likely not clinically significant [46]. It has generally  
31 been found to be well tolerated in adult as well as adolescent girls and young women [47, 48]. Various  
32 studies have reported that use of microbicides results in little or no difference in the risk of acquiring  
33 STIs like CT, NG or TV [49]. In the Buffer Gel microbicide study for example, no significant changes  
34 in colonization with *Lactobacillus* species was reported [50].  
35  
36  
37  
38  
39  
40

41 The strengths of this study included the opportunity to investigate multiple STIs and BV in the  
42 same population and the ability to collect recurrent data on genital conditions which allowed for conduct  
43 of both single-event-per-participant and multiple-event-per-participant analyses. The multiple-event-per-  
44 participant analysis models the total rate of events over the entire follow-up period and has more power  
45 for detecting associations compared to the single-event-per-participant analysis [51].  
46  
47  
48  
49  
50

51 A limitation of the study was the small sample size which may have impacted the study power  
52 and consequently the ability to detect any differences in STI/BV rates between women who reported IVP  
53 and those who did not. Another limitation was that no confirmatory tests were done to confirm absence  
54  
55  
56  
57  
58  
59  
60

1  
2  
3 of an STI/BV prior to DVR insertion. However, duration of treatment and absence of symptoms and  
4 signs were used as a proxy for lack of an STI/BV.  
5  
6

7 In conclusion, we found a high prevalence of IVP and incidence of STIs/BV among women  
8 enrolled in the Ring Study in Uganda. IVP did not statistically significantly increase STI/BV rates. This  
9 implies that women who practice intravaginal cleansing/insertion could continue using these practices in  
10 the presence of the DVR microbicide. However, our results should be interpreted with caution because  
11 of the small sample size that could generate a hypothesis but not conclusively test it. An analysis with a  
12 bigger sample size could be helpful to better understand whether there is a link between use of the DVR,  
13 IVP, and incidence of STIs/BV.  
14  
15  
16  
17  
18  
19  
20  
21

## 22 **Acknowledgements**

23 International Partnership for Microbicides' (a not-for-profit product-development partnership)  
24 work is made possible by generous support from many donors including: the Bill and Melinda Gates  
25 Foundation, Irish Aid, the Ministry of Foreign Affairs of Denmark, the Ministry of Foreign Affairs of  
26 the Netherlands, the Norwegian Agency for Development Cooperation, the U.K. Department for  
27 International Development, the American people through the U.S. Agency for International  
28 Development, and the President's Emergency Plan for AIDS Relief. We thank the study team who  
29 worked tirelessly in planning, recruitment and data collection for this study.  
30  
31  
32  
33  
34  
35

36 **Competing interests:** All authors declare that they have no conflict of interest.  
37  
38  
39

40 **Funding:** This work was supported by the International Partnership for Microbicides  
41 ([www.ipmglobal.org](http://www.ipmglobal.org)), grant number (IND # 110,659).  
42  
43  
44

## 45 **Author contributions**

46 SK, AA, ER designed the study and wrote the initial manuscript draft, and AA did the data analysis.  
47 KA and MO conducted the study while SK directed the work. KA and MO contributed to the writing  
48 and editing of the manuscript. All authors contributed to the interpretation of the results and critically  
49 commented and provided revisions to the manuscript. All authors approved the final version of the  
50  
51  
52  
53  
54  
55  
56  
57  
58  
59  
60

1  
2  
3 manuscript. The corresponding author attests that all listed authors meet authorship criteria and that no  
4  
5 others meeting the criteria have been omitted.  
6  
7

8 **Data availability statement:** Data are available on reasonable request.  
9  
10  
11  
12  
13  
14  
15  
16  
17  
18  
19  
20  
21  
22  
23  
24  
25  
26  
27  
28  
29  
30  
31  
32  
33  
34  
35  
36  
37  
38  
39  
40  
41  
42  
43  
44  
45  
46  
47  
48  
49  
50  
51  
52  
53  
54  
55  
56  
57  
58  
59  
60

For peer review only

## References

1. World Health Organization. Report on global sexually transmitted infection surveillance 2018. 2018. Report No.: 9241565691.
2. Unemo M, Bradshaw CS, Hocking JS, de Vries HJC, Francis SC, Mabey D, et al. Sexually transmitted infections: challenges ahead. *The Lancet Infectious Diseases*. 2017;17(8):e235-e79.
3. Torrone EA, Morrison CS, Chen P-L, Kwok C, Francis SC, Hayes RJ, et al. Prevalence of sexually transmitted infections and bacterial vaginosis among women in sub-Saharan Africa: an individual participant data meta-analysis of 18 HIV prevention studies. *PLoS medicine*. 2018;15(2):e1002511.
4. Awungafac G, Delvaux T, Vuylsteke B. Systematic review of sex work interventions in sub-Saharan Africa: examining combination prevention approaches. *Tropical Medicine & International Health*. 2017;22(8):971-93.
5. Bayigga L, Kateete DP, Anderson DJ, Sekikubo M, Nakanjako D. Diversity of vaginal microbiota in sub-Saharan Africa and its effects on HIV transmission and prevention. *American journal of obstetrics and gynecology*. 2019;220(2):155-66.
6. Bautista CT, Wurapa E, Sateren WB, Morris S, Hollingsworth B, Sanchez JL. Bacterial vaginosis: a synthesis of the literature on etiology, prevalence, risk factors, and relationship with chlamydia and gonorrhea infections. *Military Medical Research*. 2016;3:4.
7. Wang J. Bacterial vaginosis. Primary care update for OB/GYNS. 2000;7(5):181-5.
8. Rao D, Pindi D, Rani D, Sasikala D, Kawle D. Diagnosis of bacterial vaginosis: Amsel's Criteria vs Nugent's scoring. *Sch J Appl Med Sci*. 2016;4(6):2027-31.
9. Spurbeck RR, Arvidson CG. Lactobacilli at the front line of defense against vaginally acquired infections. *Future microbiology*. 2011;6(5):567-82.
10. Boskey E, Telsch K, Whaley K, Moench T, Cone R. Acid production by vaginal flora in vitro is consistent with the rate and extent of vaginal acidification. *Infection and immunity*. 1999;67(10):5170-5.
11. Atassi F, Brassart D, Grob P, Graf F, Servin AL. Lactobacillus strains isolated from the vaginal microbiota of healthy women inhibit *Prevotella bivia* and *Gardnerella vaginalis* in coculture and cell culture. *FEMS Immunology & Medical Microbiology*. 2006;48(3):424-32.
12. Saigh JH, Sanders CC, Sanders Jr WE. Inhibition of *Neisseria gonorrhoeae* by aerobic and facultatively anaerobic components of the endocervical flora: evidence for a protective effect against infection. *Infection and immunity*. 1978;19(2):704-10.
13. Van De Wijgert J, Mason PR, Gwanzura L, Mbizvo MT, Chirenje Z, Iliff V, et al. Intravaginal practices, vaginal flora disturbances, and acquisition of sexually transmitted diseases in Zimbabwean women. *The Journal of infectious diseases*. 2000;181(2):587-94.
14. Martin Hilber A. Women's health, hygiene and HIV in Sub-Saharan Africa: The role of vaginal practices: Ghent University; 2012.
15. Hilber AM, Francis SC, Chersich M, Scott P, Redmond S, Bender N, et al. Intravaginal practices, vaginal infections and HIV acquisition: systematic review and meta-analysis. *PloS one*. 2010;5(2):e9119.
16. Woodsong C, Alleman P. Sexual pleasure, gender power and microbicide acceptability in Zimbabwe and Malawi. *AIDS Education and Prevention*. 2008;20(2):171.
17. World Health Organization. A multi-country study on gender, sexuality and vaginal practices: Implications for sexual health 2012 [Available from: <https://www.jstor.org/stable/resrep28254>].



18. Alcaide ML, Rodriguez VJ, Fischl MA, Jones DL, Weiss SM. Addressing intravaginal practices in women with HIV and at-risk for HIV infection, a mixed methods pilot study. *International journal of women's health*. 2017;9:123-32.
19. Low N, Chersich MF, Schmidlin K, Egger M, Francis SC, van de Wijgert JH, et al. Intravaginal practices, bacterial vaginosis, and HIV infection in women: individual participant data meta-analysis. *PLoS medicine*. 2011;8(2):e1000416.
20. van de Wijgert JH. The vaginal microbiome and sexually transmitted infections are interlinked: consequences for treatment and prevention. *PLoS medicine*. 2017;14(12):e1002478.
21. Eshete A, Mekonnen Z, Zeynudin A. *Trichomonas vaginalis* infection among pregnant women in Jimma university specialized hospital, southwest Ethiopia. *International Scholarly Research Notices*. 2013;2013.
22. Van Der Pol B, Kwok C, Pierre-Louis B, Rinaldi A, Salata RA, Chen P-L, et al. *Trichomonas vaginalis* infection and human immunodeficiency virus acquisition in African women. *The Journal of infectious diseases*. 2008;197(4):548-54.
23. McClelland RS, Sangaré L, Hassan WM, Lavreys L, Mandaliya K, Kiarie J, et al. Infection with *Trichomonas vaginalis* increases the risk of HIV-1 acquisition. *The Journal of infectious diseases*. 2007;195(5):698-702.
24. Chersich M, Hilber AM, Schmidlin K, Egger M, Francis S, Baeten J, et al. Association between intravaginal practices and HIV acquisition in women: individual patient data meta-analysis of cohort studies in sub-Saharan Africa. 5th IAS Conference on HIV Pathogenesis, Treatment and Prevention 2009.
25. Francis SC, Baisley K, Lees SS, Andrew B, Zalwango F, Seeley J, et al. Vaginal practices among women at high risk of HIV infection in Uganda and Tanzania: recorded behaviour from a daily pictorial diary. *PloS one*. 2013;8(3):e59085.
26. Nel A, van Niekerk N, Kapiga S, Bekker LG, Gama C, Gill K, et al. Safety and Efficacy of a Dapivirine Vaginal Ring for HIV Prevention in Women. *The New England journal of medicine*. 2016;375(22):2133-43.
27. Baeten JM, Palanee-Phillips T, Brown ER, Schwartz K, Soto-Torres LE, Govender V, et al. Use of a vaginal ring containing dapivirine for HIV-1 prevention in women. *New England Journal of Medicine*. 2016;375(22):2121-32.
28. Nel A, van Niekerk N, Van Baelen B, Malherbe M, Mans W, Carter A, et al. Safety, adherence, and HIV-1 seroconversion among women using the dapivirine vaginal ring (DREAM): an open-label, extension study. *The lancet HIV*. 2021;8(2):e77-e86.
29. Kusemererwa S, Abaasa A, Onyango M, Nel AM, Isaacs M, Asiki G. Contraceptive preference among women at risk of HIV acquisition in a preparatory screening study for a phase III microbicide trial in South Western Uganda. *AIDS and behavior*. 2018;22(1):131-8.
30. *Sexually Transmitted Diseases Treatment Guidelines*, (2010).
31. Myer L, Denny L, WRIGHT JR TC, DE SOUZA M, BARONE MA, Kuhn L. Intravaginal practices, HIV and other sexually transmitted diseases among South African women. *Sexually Transmitted Diseases*. 2004:174-9.
32. Fonck K, Kaul R, Keli F, Bwayo JJ, Ngugi EN, Moses S, et al. Sexually transmitted infections and vaginal douching in a population of female sex workers in Nairobi, Kenya. *Sexually Transmitted Infections*. 2001;77(4):271-5.
33. Lees S, Zalwango F, Andrew B, Vandepitte J, Seeley J, Hayes RJ, et al. Understanding motives for intravaginal practices amongst Tanzanian and Ugandan women at high risk of HIV infection: The

- embodiment of social and cultural norms and well-being. *Social Science & Medicine*. 2014;102:165-73.
34. Hull T, Hilber AM, Chersich MF, Bagnol B, Prohmmo A, Smit JA, et al. Prevalence, motivations, and adverse effects of vaginal practices in Africa and Asia: findings from a multicountry household survey. *Journal of women's health*. 2011;20(7):1097-109.
35. Martin Hilber A, Kenter E, Redmond S, Merten S, Bagnol B, Low N, et al. Vaginal practices as women's agency in Sub-Saharan Africa: A synthesis of meaning and motivation through meta-ethnography. *Social Science & Medicine*. 2012;74(9):1311-23.
36. Allen CF, Desmond N, Chiduo B, Medard L, Lees SS, Vallely A, et al. Intravaginal and menstrual practices among women working in food and recreational facilities in Mwanza, Tanzania: implications for microbicide trials. *AIDS and behavior*. 2010;14:1169-81.
37. Gafos M, Pool R, Mzimela MA, Ndlovu HB, McCormack S, Elford J, et al. The implications of post-coital intravaginal cleansing for the introduction of vaginal microbicides in South Africa. *AIDS and behavior*. 2014;18:297-310.
38. Masson L, Arnold KB, Little F, Mlisana K, Lewis DA, Mkhize N, et al. Inflammatory cytokine biomarkers to identify women with asymptomatic sexually transmitted infections and bacterial vaginosis who are at high risk of HIV infection. *Sexually transmitted infections*. 2016;92(3):186-93.
39. Mirzadeh M, Olfatifar M, Eslahi AV, Abdoli A, Houshmand E, Majidiani H, et al. Global prevalence of *Trichomonas vaginalis* among female sex workers: a systematic review and meta-analysis. *Parasitology research*. 2021;120(7):2311-22.
40. Umami A, Paulik E, Molnár R, Bhisma M. The relationship between genital hygiene behaviors and genital infections among women: A systematic review. *Jurnal Ners*. 2022;17(1):89-101.
41. Daher A, Albaini O, Siff L, Farah S, Jallad K. Intimate hygiene practices and reproductive tract infections: A systematic review. *Gynecology and Obstetrics Clinical Medicine*. 2022.
42. Myer L, Kuhn L, Stein ZA, Wright TC, Jr., Denny L. Intravaginal practices, bacterial vaginosis, and women's susceptibility to HIV infection: epidemiological evidence and biological mechanisms. *The Lancet Infectious diseases*. 2005;5(12):786-94.
43. Mwatelah R, McKinnon LR, Baxter C, Abdool Karim Q, Abdool Karim SS. Mechanisms of sexually transmitted infection-induced inflammation in women: implications for HIV risk. *Journal of the International AIDS Society*. 2019;22:e25346.
44. Gong Z, Luna Y, Yu P, Fan H. Lactobacilli inactivate *Chlamydia trachomatis* through lactic acid but not H<sub>2</sub>O<sub>2</sub>. *PloS one*. 2014;9(9):e107758.
45. Mirmonsef P, Hotton AL, Gilbert D, Burgad D, Landay A, Weber KM, et al. Free glycogen in vaginal fluids is associated with *Lactobacillus* colonization and low vaginal pH. *PloS one*. 2014;9(7):e102467.
46. Austin MN, Meyn LA, Avolia HA, Petrina MA, Cosentino LA, Alphonse C, et al. Impact of Dapivirine and Placebo Vaginal Rings on the Microbiota of Adolescent, Lactating, and Postmenopausal Females. *The Journal of infectious diseases*. 2022;225(12):2208-18.
47. Zuend CF, Noël-Romas L, Hoger S, McCorriser S, Westmacott G, Marrazzo J, et al. Influence of dapivirine vaginal ring use on cervicovaginal immunity and functional microbiome in adolescent girls. *AIDS (London, England)*. 2021;35(3):369.
48. Nel A, Haazen W, Nuttall J, Romano J, Rosenberg Z, van Niekerk N. A safety and pharmacokinetic trial assessing delivery of dapivirine from a vaginal ring in healthy women. *AIDS*. 2014;28(10):1479-87.
49. Obiero J, Ogongo P, Mwethera PG, Wiysonge CS. Topical microbicides for preventing sexually transmitted infections. *The Cochrane database of systematic reviews*. 2021;3(3):Cd007961.

- 1  
2  
3 50. Clarke JG, Peipert JF, Hillier SL, Heber W, Boardman L, Moench TR, et al. Microflora changes  
4 with the use of a vaginal microbicide. *Sexually transmitted diseases*. 2002:288-93.  
5 51. Juarez-Colunga E, Rosenfeld M, Zemanick ET, Wagner B. Application of multiple event  
6 analysis as an alternative approach to studying pulmonary exacerbations as an outcome measure.  
7 *Journal of Cystic Fibrosis*. 2020;19(1):114-8.  
8  
9  
10  
11  
12  
13  
14  
15  
16  
17  
18  
19  
20  
21  
22  
23  
24  
25  
26  
27  
28  
29  
30  
31  
32  
33  
34  
35  
36  
37  
38  
39  
40  
41  
42  
43  
44  
45  
46  
47  
48  
49  
50  
51  
52  
53  
54  
55  
56  
57  
58  
59  
60

For peer review only

1  
2  
3  
4  
5  
6  
7  
8  
9  
10  
11  
12  
13  
14  
15  
16  
17  
18  
19  
20  
21  
22  
23  
24  
25  
26  
27  
28  
29  
30  
31  
32  
33  
34  
35  
36  
37  
38  
39  
40  
41  
42  
43  
44  
45  
46  
47  
48  
49  
50  
51  
52  
53  
54  
55  
56  
57  
58  
59  
60

## STROBE Statement—checklist of items that should be included in reports of observational studies

|                              | Item No | Recommendation                                                                                                                                                                                                                                                                                                                                                                                                                                                         | Page No |
|------------------------------|---------|------------------------------------------------------------------------------------------------------------------------------------------------------------------------------------------------------------------------------------------------------------------------------------------------------------------------------------------------------------------------------------------------------------------------------------------------------------------------|---------|
| <b>Title and abstract</b>    | 1       | (a) Indicate the study's design with a commonly used term in the title or the abstract                                                                                                                                                                                                                                                                                                                                                                                 | 2       |
|                              |         | (b) Provide in the abstract an informative and balanced summary of what was done and what was found                                                                                                                                                                                                                                                                                                                                                                    | 2       |
| <b>Introduction</b>          |         |                                                                                                                                                                                                                                                                                                                                                                                                                                                                        |         |
| Background/rationale         | 2       | Explain the scientific background and rationale for the investigation being reported                                                                                                                                                                                                                                                                                                                                                                                   | 4, 5    |
| Objectives                   | 3       | State specific objectives, including any prespecified hypotheses                                                                                                                                                                                                                                                                                                                                                                                                       | 4, 5    |
| <b>Methods</b>               |         |                                                                                                                                                                                                                                                                                                                                                                                                                                                                        |         |
| Study design                 | 4       | Present key elements of study design early in the paper                                                                                                                                                                                                                                                                                                                                                                                                                | 5       |
| Setting                      | 5       | Describe the setting, locations, and relevant dates, including periods of recruitment, exposure, follow-up, and data collection                                                                                                                                                                                                                                                                                                                                        | 5, 6    |
| Participants                 | 6       | (a) <i>Cohort study</i> —Give the eligibility criteria, and the sources and methods of selection of participants. Describe methods of follow-up<br><i>Case-control study</i> —Give the eligibility criteria, and the sources and methods of case ascertainment and control selection. Give the rationale for the choice of cases and controls<br><i>Cross-sectional study</i> —Give the eligibility criteria, and the sources and methods of selection of participants | 5, 6    |
|                              |         | (b) <i>Cohort study</i> —For matched studies, give matching criteria and number of exposed and unexposed<br><i>Case-control study</i> —For matched studies, give matching criteria and the number of controls per case                                                                                                                                                                                                                                                 | NA      |
| Variables                    | 7       | Clearly define all outcomes, exposures, predictors, potential confounders, and effect modifiers. Give diagnostic criteria, if applicable                                                                                                                                                                                                                                                                                                                               | 6, 7    |
| Data sources/<br>measurement | 8*      | For each variable of interest, give sources of data and details of methods of assessment (measurement). Describe comparability of assessment methods if there is more than one group                                                                                                                                                                                                                                                                                   | 6, 7    |
| Bias                         | 9       | Describe any efforts to address potential sources of bias                                                                                                                                                                                                                                                                                                                                                                                                              | 6, 7    |
| Study size                   | 10      | Explain how the study size was arrived at                                                                                                                                                                                                                                                                                                                                                                                                                              | 5, 6    |
| Quantitative variables       | 11      | Explain how quantitative variables were handled in the analyses. If applicable, describe which groupings were chosen and why                                                                                                                                                                                                                                                                                                                                           | 6, 7    |
| Statistical methods          | 12      | (a) Describe all statistical methods, including those used to control for confounding                                                                                                                                                                                                                                                                                                                                                                                  | 7, 8    |
|                              |         | (b) Describe any methods used to examine subgroups and interactions                                                                                                                                                                                                                                                                                                                                                                                                    | NA      |
|                              |         | (c) Explain how missing data were addressed                                                                                                                                                                                                                                                                                                                                                                                                                            | NA      |
|                              |         | (d) <i>Cohort study</i> —If applicable, explain how loss to follow-up was addressed<br><i>Case-control study</i> —If applicable, explain how matching of cases and controls was addressed<br><i>Cross-sectional study</i> —If applicable, describe analytical methods taking account of sampling strategy                                                                                                                                                              | NA      |
|                              |         | (e) Describe any sensitivity analyses                                                                                                                                                                                                                                                                                                                                                                                                                                  | 7, 8    |

Continued on next page

| <b>Results</b>           |     |                                                                                                                                                                                                              | <b>Page</b> |
|--------------------------|-----|--------------------------------------------------------------------------------------------------------------------------------------------------------------------------------------------------------------|-------------|
| Participants             | 13* | (a) Report numbers of individuals at each stage of study—eg numbers potentially eligible, examined for eligibility, confirmed eligible, included in the study, completing follow-up, and analysed            | 9, 10, 11   |
|                          |     | (b) Give reasons for non-participation at each stage                                                                                                                                                         | NA          |
|                          |     | (c) Consider use of a flow diagram                                                                                                                                                                           | NA          |
| Descriptive data         | 14* | (a) Give characteristics of study participants (eg demographic, clinical, social) and information on exposures and potential confounders                                                                     | 9, 10, 11   |
|                          |     | (b) Indicate number of participants with missing data for each variable of interest                                                                                                                          | NA          |
|                          |     | (c) <i>Cohort study</i> —Summarise follow-up time (eg, average and total amount)                                                                                                                             |             |
| Outcome data             | 15* | <i>Cohort study</i> —Report numbers of outcome events or summary measures over time                                                                                                                          | 11, 12, 13  |
|                          |     | <i>Case-control study</i> —Report numbers in each exposure category, or summary measures of exposure                                                                                                         |             |
|                          |     | <i>Cross-sectional study</i> —Report numbers of outcome events or summary measures                                                                                                                           |             |
| Main results             | 16  | (a) Give unadjusted estimates and, if applicable, confounder-adjusted estimates and their precision (eg, 95% confidence interval). Make clear which confounders were adjusted for and why they were included | 11          |
|                          |     | (b) Report category boundaries when continuous variables were categorized                                                                                                                                    |             |
|                          |     | (c) If relevant, consider translating estimates of relative risk into absolute risk for a meaningful time period                                                                                             |             |
| Other analyses           | 17  | Report other analyses done—eg analyses of subgroups and interactions, and sensitivity analyses                                                                                                               | NA          |
| <b>Discussion</b>        |     |                                                                                                                                                                                                              |             |
| Key results              | 18  | Summarise key results with reference to study objectives                                                                                                                                                     | 14, 15      |
| Limitations              | 19  | Discuss limitations of the study, taking into account sources of potential bias or imprecision. Discuss both direction and magnitude of any potential bias                                                   | 15, 16      |
| Interpretation           | 20  | Give a cautious overall interpretation of results considering objectives, limitations, multiplicity of analyses, results from similar studies, and other relevant evidence                                   | 16          |
| Generalisability         | 21  | Discuss the generalisability (external validity) of the study results                                                                                                                                        | 16          |
| <b>Other information</b> |     |                                                                                                                                                                                                              |             |
| Funding                  | 22  | Give the source of funding and the role of the funders for the present study and, if applicable, for the original study on which the present article is based                                                | 16          |

\*Give information separately for cases and controls in case-control studies and, if applicable, for exposed and unexposed groups in cohort and cross-sectional studies.

**Note:** An Explanation and Elaboration article discusses each checklist item and gives methodological background and published examples of transparent reporting. The STROBE checklist is best used in conjunction with this article (freely available on the Web sites of PLoS Medicine at <http://www.plosmedicine.org/>, Annals of Internal Medicine at <http://www.annals.org/>, and Epidemiology at <http://www.epidem.com/>). Information on the STROBE Initiative is available at [www.strobe-statement.org](http://www.strobe-statement.org).

# BMJ Open

## Associations between intravaginal practices and incidence of sexually transmitted infections and bacterial vaginosis among women enrolled in the Dapivirine vaginal ring trial (The Ring Study) in southwestern Uganda, a retrospective secondary analysis

|                                 |                                                                                                                                                                                                                                                                                                                                                                                                                                                                                                                                                                                                                                                                                   |
|---------------------------------|-----------------------------------------------------------------------------------------------------------------------------------------------------------------------------------------------------------------------------------------------------------------------------------------------------------------------------------------------------------------------------------------------------------------------------------------------------------------------------------------------------------------------------------------------------------------------------------------------------------------------------------------------------------------------------------|
| Journal:                        | <i>BMJ Open</i>                                                                                                                                                                                                                                                                                                                                                                                                                                                                                                                                                                                                                                                                   |
| Manuscript ID                   | bmjopen-2023-079497.R2                                                                                                                                                                                                                                                                                                                                                                                                                                                                                                                                                                                                                                                            |
| Article Type:                   | Original research                                                                                                                                                                                                                                                                                                                                                                                                                                                                                                                                                                                                                                                                 |
| Date Submitted by the Author:   | 07-Feb-2024                                                                                                                                                                                                                                                                                                                                                                                                                                                                                                                                                                                                                                                                       |
| Complete List of Authors:       | Kusemererwa, Sylvia; MRC/UVRI and LSHTM Uganda Research Unit, Viral Pathogens Epidemiology and Interventions<br>Ruzagira, Eugene; MRC/UVRI and LSHTM Uganda Research Unit, Viral Pathogens Epidemiology and Interventions; London School of Hygiene & Tropical Medicine Faculty of Epidemiology and Population Health<br>Onyango, Martin; MRC/UVRI and LSHTM Uganda Research Unit, Viral Pathogens Epidemiology and Interventions<br>Kabarambi, Anita; International Centre for Child Health and Development<br>Abaasa, Andrew; MRC/UVRI and LSHTM Uganda Research Unit, Statistics & Data Science; London School of Hygiene & Tropical Medicine, Infectious Disease Epidemiology |
| <b>Primary Subject Heading</b>: | Public health                                                                                                                                                                                                                                                                                                                                                                                                                                                                                                                                                                                                                                                                     |
| Secondary Subject Heading:      | Sexual health                                                                                                                                                                                                                                                                                                                                                                                                                                                                                                                                                                                                                                                                     |
| Keywords:                       | Public health < INFECTIOUS DISEASES, Sexually Transmitted Disease, HIV & AIDS < INFECTIOUS DISEASES, Epidemiology < INFECTIOUS DISEASES                                                                                                                                                                                                                                                                                                                                                                                                                                                                                                                                           |
|                                 |                                                                                                                                                                                                                                                                                                                                                                                                                                                                                                                                                                                                                                                                                   |

SCHOLARONE™  
Manuscripts



I, the Submitting Author has the right to grant and does grant on behalf of all authors of the Work (as defined in the below author licence), an exclusive licence and/or a non-exclusive licence for contributions from authors who are: i) UK Crown employees; ii) where BMJ has agreed a CC-BY licence shall apply, and/or iii) in accordance with the terms applicable for US Federal Government officers or employees acting as part of their official duties; on a worldwide, perpetual, irrevocable, royalty-free basis to BMJ Publishing Group Ltd ("BMJ") its licensees and where the relevant Journal is co-owned by BMJ to the co-owners of the Journal, to publish the Work in this journal and any other BMJ products and to exploit all rights, as set out in our [licence](#).

The Submitting Author accepts and understands that any supply made under these terms is made by BMJ to the Submitting Author unless you are acting as an employee on behalf of your employer or a postgraduate student of an affiliated institution which is paying any applicable article publishing charge ("APC") for Open Access articles. Where the Submitting Author wishes to make the Work available on an Open Access basis (and intends to pay the relevant APC), the terms of reuse of such Open Access shall be governed by a Creative Commons licence – details of these licences and which [Creative Commons](#) licence will apply to this Work are set out in our licence referred to above.

Other than as permitted in any relevant BMJ Author's Self Archiving Policies, I confirm this Work has not been accepted for publication elsewhere, is not being considered for publication elsewhere and does not duplicate material already published. I confirm all authors consent to publication of this Work and authorise the granting of this licence.

1  
2  
3 **Associations between intravaginal practices and incidence of sexually transmitted**  
4 **infections and bacterial vaginosis among women enrolled in the Dapivirine vaginal ring**  
5 **trial (The Ring Study) in southwestern Uganda, a retrospective secondary analysis.**  
6  
7  
8  
9

10 **Authors:** Sylvia Kusemererwa<sup>1\*</sup>, Eugene Ruzagira<sup>1,3</sup>, Martin Onyango<sup>1</sup>, Anita Kabarambi<sup>4</sup>,  
11 Andrew Abaasa<sup>2,3</sup>  
12  
13

14  
15  
16 **Institution**  
17

18 <sup>1</sup>Department of viral pathogen epidemiology and interventions, Medical Research Council/  
19 Uganda Virus Research Institute and London School of Hygiene and Tropical Medicine, Uganda  
20 Research Unit, Entebbe, Uganda  
21  
22

23  
24 <sup>2</sup>Department of statistics, Medical Research Council/ Uganda Virus Research Institute and  
25 London School of Hygiene and Tropical Medicine, Uganda Research Unit, Entebbe, Uganda  
26  
27

28 <sup>3</sup> Department of infectious diseases epidemiology, London School of Hygiene & Tropical  
29 Medicine, London, UK  
30  
31

32 <sup>4</sup>Department of research, International Center for Child Health and Development, Masaka,  
33 Uganda  
34  
35

36  
37  
38  
39  
40  
41  
42 Correspondence to: Sylvia Kusemererwa, <sup>1</sup>Medical Research Council/Uganda Virus Research  
43 Institute (MRC/UVRI) and London School of Hygiene and Tropical Medicine (LSHTM),  
44 Uganda Research Unit, Plot 51-59, Nakiwogo Road, P.O Box 49 Entebbe, Uganda. Phone: 256  
45 (0) 417 704000, or 256 (0) 70229100. [Sylvia.Kusemererwa@mrcuganda.org](mailto:Sylvia.Kusemererwa@mrcuganda.org) or  
46  
47 [kansykarus@gmail.com](mailto:kansykarus@gmail.com)  
48  
49  
50  
51  
52  
53  
54  
55  
56  
57  
58  
59  
60



1  
2  
3 **Associations between intravaginal practices and incidence of sexually transmitted**  
4 **infections and bacterial vaginosis among women enrolled in the Dapivirine vaginal ring**  
5 **trial (The Ring Study) in southwestern Uganda, a retrospective secondary analysis.**  
6  
7  
8  
9

10 **Abstract**

11 **Objectives:** We assessed associations between intravaginal practices (IVP) and the incidence of  
12 sexually transmitted infections (STIs) and bacterial vaginosis (BV) among women using the  
13 dapivirine vaginal ring (DVR) or placebo vaginal ring in southwestern Uganda.  
14  
15

16 **Methods:** This was a retrospective secondary analysis of data collected from women at risk of  
17 HIV infection recruited into The Ring Study. The latter evaluated the safety and efficacy of the  
18 DVR between 2013 and 2016. At baseline, a behavioral questionnaire was administered to obtain  
19 information on sexual activity and IVP (exposure) defined as; insertion inside the vagina of any  
20 items aimed at cleaning the vagina for any reason before, during or after sex other than practices  
21 to manage menses. Each participant self-inserted the DVR/placebo and replaced it every 4weeks  
22 for 2 years. Outcomes were diagnosis of STIs i.e., *Chlamydia trachomatis* (CT), *Neisseria*  
23 *gonorrhoea* (NG), *Trichomonas vaginalis* (TV), HIV and BV. The incidence rate of STI/BV was  
24 estimated, overall, by IVP and trial arm in single-event-per-participant and multiple-event-per-  
25 participant analyses.  
26  
27  
28  
29

30 **Results:** Of the 197 women enrolled, 66 (33.5%) were <25 years of age. Overall, 93 (47.2%)  
31 practiced at least one form of IVP. During follow up, 172 (87.3%) women were diagnosed with an  
32 STI/BV at least once. Majority had TV (73.6%, n=145). Overall rate of STI/BV was 51.9/100  
33 person-years, 95% confidence interval (CI): 44.7-60.3 [IVP: Yes, 51.0 (40.8-63.8) vs. No, 52.6  
34 (43.0-64.4)]. IVP were not statistically significantly associated with rate of individual STIs/BV.  
35 Similar results were observed when the analyses were conducted separately for each trial arm.  
36  
37  
38

39 **Conclusions:** IVP was not associated with risk of STIs/BV in The Ring Study.  
40  
41

42 **Key words:** Intravaginal practices, sexually transmitted infection, Bacterial vaginosis,  
43 Dapivirine, Vaginal Ring, Uganda  
44  
45  
46  
47  
48  
49  
50  
51  
52  
53  
54  
55  
56  
57  
58  
59  
60

### Study strengths and limitations

- The study was able to investigate multiple STIs and BV in the same population.
- The longitudinal nature of the study allowed for both single-event-per-participant and multiple-event-per-participant analyses.
- Extensive analysis was to some extent limited by a small sample size.
- Confirmatory tests were not done to confirm absence of an STI/BV prior to DVR insertion.

For peer review only

## INTRODUCTION

Sexually transmitted infections (STIs) remain a health challenge globally. In 2018, WHO estimated that nearly one million people become infected every day with a curable STI caused by: *Chlamydia trachomatis* (CT), *Neisseria gonorrhoea* (NG), Syphilis or *Trichomonas vaginalis* (TV).[1] STIs disproportionately affect low-and-middle-income countries, with 90% of the new infections occurring in these countries.[2] Women in sub-Saharan Africa have a high prevalence of STIs, particularly those at high risk of HIV infection also having a high STI burden.[3, 4] Bacterial vaginosis (BV), a common vaginal condition has also been associated with increased risk of STIs and HIV infection. [5] High rates (37% to 68%) of BV have been reported among women at high risk of HIV acquisition in Southern and East Africa. [6]

BV results from variation in normal vaginal flora attributed to reduction in the prevalence of Lactobacilli (dominant species in healthy vaginal environment) and an increase in the concentration of pathogenic organisms: *G. vaginalis*, *Bacteroides (Prevotella)* species, *Mobiluncus* species, and *Mycoplasma hominis*. [7, 8] Increasing evidence shows that vaginal microbiota may play a role in mediating susceptibility to STIs. Vaginal Lactobacilli utilize a number of actions to protect against colonization by genital pathogens. [9] This can be through: production of lactic acid that supports the maintenance of a lower vaginal pH, which may prevent pathogen growth, [10] exposure to hydrogen peroxide that has also been shown to decrease activity of BV and other genital tract organisms. [11, 12]

The high prevalence and increased risk of acquisition of STIs/BV and HIV has been associated with vaginal practices.[13] These practices include various behaviors used to maintain health, wellness, and enhance sexual pleasure.[14-16] The World Health Organization (WHO) has suggested seven classifications for vaginal practices: external washing, intravaginal cleansing, external application, intravaginal insertion, oral ingestion, vaginal streaming or smoking and anatomical modification.[17] On the other hand intravaginal practices (IVPs) refer to both intravaginal cleansing (cleaning or washing inside the vagina with fingers or substances like soap to remove fluids), and intravaginal insertion (placing something inside the vagina, like powders, creams, herbs, or tissue).[18, 19]

1  
2  
3 Soaps, detergents and antiseptics used to cleanse inside the vagina can cause chemical  
4 damage and increase vaginal pH resulting in overgrowth of BV related organisms, which has also  
5 been associated with increased risk of HIV acquisition.[19, 20] Other products have also been  
6 reported to cause genital lesions, and swellings, creating favorable conditions for the transmission  
7 of STIs, including HIV.[17] Items like cloth commonly used in some communities to clean the  
8 vagina repeatedly might also act as fomites, carrying TV organisms. [21] TV has also been  
9 associated with increased risk of HIV acquisition. [22, 23] These practices which increase a  
10 woman's susceptibility to HIV could reduce the effectiveness of vaginal microbicides. [24, 25]  
11  
12  
13  
14  
15  
16  
17

18 The monthly dapivirine vaginal ring (DVR) microbicide, a female controlled HIV  
19 prevention tool, was found to reduce the risk of HIV acquisition by approximately 30% in two  
20 phase 3 trials. [26, 27] With continued and consistent use, the risk of HIV acquisition was even  
21 lower (62%) in an open-label extension trial. [28] However, data are limited on the effect of  
22 intravaginal practices on vaginal flora and risk of STIs/BV among women using the DVR. We  
23 assessed associations between intravaginal practices and the incidence of STIs including HIV, and  
24 BV among women using the DVR or placebo vaginal ring in southwestern Uganda.  
25  
26  
27  
28  
29  
30  
31

## 32 **METHODS**

### 33 **Study design**

34  
35 This was a retrospective secondary analysis using data collected in The Ring Study, a phase 3  
36 microbicide trial.[26]  
37  
38  
39  
40

### 41 **Study setting and population**

42  
43 Details of the Ring Study (Registration number: NCT01539226) have been described elsewhere.  
44 [26] Briefly, The Ring Study was a multicenter microbicide trial, that evaluated the safety and  
45 efficacy of the DVR between 2013 and 2016 in Uganda and South Africa. The study was  
46 sponsored by the International Partnership for Microbicides. In Uganda, the study was conducted  
47 by the Medical Research Council (MRC)/Uganda Virus Research Institute (UVRI) and London  
48 School of Hygiene and Tropical Medicine (LSHTM) Uganda Research Unit in Masaka,  
49 southwestern Uganda. The site recruited women at high risk of HIV infection from towns along  
50 the trans-African highway and the shores of Lake Victoria. Details of the recruitment procedures  
51  
52  
53  
54  
55  
56  
57

1  
2  
3 and study population have been described elsewhere.[29] Briefly, the research site enrolled 197  
4 women (18-45years of age) at high risk of HIV infection. Women were identified from sex work  
5 hotspots (bars, restaurants, hair salons, small shops, and other small-scale businesses). High risk  
6 was defined by presence of any two of the following: i) history of STIs in the past three months;  
7 ii) self-reported condom less sex with multiple sex partners or a new partner in the past three  
8 months; and iii) use of recreational drugs (marijuana, alcohol) in the past three months. Of the  
9 women enrolled, two in five were working in bars and restaurants and nearly a third had small  
10 scale businesses. A woman was included in the main study if they were not pregnant, not  
11 breastfeeding, asymptomatic for genital infections and tested HIV negative at the time of  
12 enrolment. Those diagnosed with any clinically significant curable STI, were initiated on treatment  
13 for at least a week prior and enrolled after completing a full course of treatment.  
14  
15  
16  
17  
18  
19  
20  
21  
22  
23  
24

### 25 **Study procedures**

26  
27 Participants consented for screening and enrolment on two separate occasions. At the first visit  
28 (screening), data on demographics, inclusion and exclusion criteria were obtained. A physical and  
29 genital examination was done. All potential participants were provided with HIV/STI risk-  
30 reduction counselling and HIV pre- and post-test counselling. At the second visit (enrolment),  
31 women who met all inclusion criteria and no exclusion criteria, had a normal pelvic examination,  
32 and negative HIV rapid tests were enrolled into the trial. Eligible women were randomised in a 2:1  
33 ratio to either the DVR arm or placebo arm. At the enrolment visit, an interviewer-administered  
34 behavioral questionnaire was used to obtain baseline information on sexual activity and vaginal  
35 practices. At 4 weeks post-enrolment and every 24 weeks thereafter for the next 2 years, follow-  
36 up data on vaginal practices were collected using an interviewer-administered behavioral  
37 questionnaire. The latter included questions to which participants replied by selecting from a  
38 variety of pre-specified responses and provided open-ended responses about their IVP. Participants  
39 self-inserted a vaginal ring every 4 weeks for up to 104 weeks.  
40  
41  
42  
43  
44  
45  
46  
47  
48  
49  
50  
51

52 **Measurement of exposure [intravaginal practices (IVP)]:** IVP was defined as insertion inside  
53 the vagina of any items aimed at cleaning the vagina for any reason before, during or after sex  
54 other than practices to manage menses. Items included: materials such as paper, cloth, or cotton  
55  
56  
57  
58  
59  
60

1  
2  
3 wool; water only; water and soap; fingers to clean or insert something. Women were asked if they  
4 were inserting or using any of the aforementioned items inside the vagina to clean their vagina  
5 either as a general cleaning/hygiene practice before or after sex or to prepare the vagina for sex in  
6 the past, at baseline and every 24 weeks.  
7  
8  
9

10  
11  
12 **Measurement of outcome (diagnosis of STIs/BV):** Cervico-vaginal swabs were collected at the  
13 first screening visit and every 12 weeks (3 months) for 2 years. The swabs were tested for TV  
14 (OSOM® Trichomonas Rapid test- Sekisui Diagnostics, LLC, USA) and CT/NG (Cobas®  
15 Amplicor CT/NG -PCR test, Roche Diagnostic Systems, Branchburg, New Jersey). Vaginal fluid  
16 samples were also collected by trained clinicians using sterile swabs for assessment of vaginal  
17 flora (using Nugent's score) and vaginal fluid pH at the enrolment visit (prior to ring insertion)  
18 and every 12 weeks. Samples with a score of  $\geq 7$  were classified as BV present. Each slide was  
19 scored by trained laboratory technologists. For internal quality control, a single batch of slides  
20 were re-examined by an independent reader weekly. Discrepant results were resolved by expert  
21 consensus. External quality control was assured using College of American Pathologists Vaginitis  
22 screen, vaginal gram stain-VS2 as part of the site standard operating procedures.  
23  
24  
25  
26  
27  
28  
29  
30  
31

32 Participants were tested for HIV at the screening and enrolment visit using whole blood  
33 samples collected by venipuncture. Serial rapid HIV antibody tests were done using Alere  
34 Determine™ HIV-1/2 (Alere, Medical co., Ltd, Matsuhidai, Matsudo-shi, Chiba, Japan) followed  
35 by OraQuick- ADVANCE® Rapid HIV-1/2 Test (OraQuick-OraSure Technologies Inc,  
36 Pennsylvania) to confirm a positive Determine result and Uni- Gold™ HIV (Trinity Biotech,  
37 Ireland) as the tie breaker. At the screening/enrolment visits, a participant was confirmed to have  
38 HIV infection if they tested positive on at least two rapid HIV antibody tests. Post-enrolment, HIV  
39 testing was done serially as described above. However, for participants who tested positive or  
40 discordant on two rapid HIV antibody tests, a confirmatory test on stored plasma was done using  
41 Western Blot (J. Mitra and Co.Pvt. ltd, India) as previously described. Blood samples were  
42 collected and plasma stored every 4 weeks. Stored plasma samples for participants with confirmed  
43 HIV infection were retrospectively tested at a central laboratory in South Africa (Bioanalytical  
44 Research Corporation) for HIV ribonucleic acid (RNA) copies (viral load) using the polymerase-  
45 chain-reaction (PCR) assay. [26]  
46  
47  
48  
49  
50  
51  
52  
53  
54  
55  
56  
57  
58  
59  
60

## Statistical analysis

Data analyses were performed in Stata version 15.0 (Stata Corp, College Station, TX, USA). Participants' baseline characteristics were summarized using frequencies and percentages overall and by IVP status and compared between IVP users and none users using a chi-squared test. We determined the proportion of participants that were positive for a given STI/BV (event) as the number who tested positive for an STI/BV at least once during the study divided by the total number tested. We determined associations between IVP and incidence of each STI/BV, by estimating the rate of STI/BV overall and stratified by IVP status. We used two approaches for measuring the rate of STI/BV; (a) a single-event-per-participant (allowing for one event per participant-first STI/BV event) and (b) a multiple-event-per-participant (allowing for two or more STI/BV events for the same participant) since these are recurrent events. The incidence rate of a given STI/BV was estimated as the number of participants who tested positive for STI/BV divided by the person-time (years) at risk (pyr) expressed as per 100 pyr. PYR were estimated as a sum of the time from enrolment into the trial (those negative at baseline) to the date of trial completion or censoring (trial end, end of ring use and their first event for a given outcome). Participants that tested positive for STI/BV at baseline were given treatment and started to contribute person-time after completing the course of treatment. Similar approach was followed for those that got infected during follow up though the person time was segmented to allow for multiple entry and exit from the analysis following treatment. We further adjusted the effect of IVP on rate of STI/BV for age and baseline STI/BV status by fitting Poisson regression models. In the analysis, we used Poisson regression model with time-varying covariates, allowing for intergroup correlation (because women had multiple records) by using cluster robust standard errors. For HIV, we estimated the rate of HIV infection as number of HIV positive cases divided by the total person years at risk expressed as per 100 person years at risk in a single-event-per-participant survival analysis. Person time at risk were calculated as sum of the time from enrolment to the last HIV seronegative date (for those that remained negative throughout the trial) or to the estimated date of HIV infection. The HIV infection date was estimated as a multiple imputation random date between the last HIV seronegative and the first HIV+ result date.

## Compliance with Ethical Standards

Approval was obtained from the Uganda Virus Research Institute Research Ethics Committee (Ref#-GC/127/13/03/33), the Uganda National Council of Science and Technology (Ref#-HS1362) and the National Drug Authority (Ref#-166/ESR/NDA/DID-07/2013). Written informed consent was obtained from each woman before any study procedures were performed. Women who tested HIV-positive were referred to an HIV care provider of their choice. Treatment was provided to those who tested positive for STIs/BV according to the Centers for Disease Control and Prevention (CDC) STD Treatment guidelines 2010. [30]

## Patient and Public Involvement Statement

Communities where the study was conducted were involved from the inception of the study. Community gate keepers: Local Council leaders, political leaders, village health teams, community based and faith based organizations were informed of the study via various engagement meetings prior to study start. The site Community Advisory Board (CAB) members were engaged to review study documents, consent and other study literacy documents and confirm translations to the local language. The CAB was compensated for all the activities they were involved in. Volunteer recruitment and retention was supported by local leaders. Results were disseminated to study participants, CAB and community members through community meetings upon study completion and presentations at national and international meetings, seminars and conferences. All stakeholders were compensated for the time spent during engagement meetings.

## RESULTS

### Baseline socio-demographic characteristics

In total, 197 women enrolled, 67% on the DVR trial arm. Of those, 66 (33.5%) were less than 25 years of age, 82 (41.6%) were married and very few 24 (12.2%) had secondary school education. Majority, 162 (82.2%) reported having a main partner but only 75 (46.3%) lived with this partner (Table 1). About a half, 100 (50.8%) tested positive for an STI/ BV at baseline. Compared with



those who had one episode of STI/BV, participants with two or more episodes were likely to be single and never married (47.8% vs. 35.6%), not currently living with a main partner (56.5% vs. 37.5%,  $p=0.033$ ) and inconsistently living with the main partner in the past year (69.6% vs. 41.7%;  $p=0.001$ ) but otherwise similar in regard to other participant characteristics.

**Table 1: Baseline socio-demographic characteristics of 197 women enrolled in The Ring Study in southwestern Uganda between 2013 and 2016**

| Variable                                   | All<br>n (%) | Intravaginal practices |              | p-value      |
|--------------------------------------------|--------------|------------------------|--------------|--------------|
|                                            |              | No<br>n (%)            | Yes<br>n (%) |              |
| Overall                                    | 197          | 104 (52.8)             | 93 (47.2)    |              |
| Trial arm                                  |              |                        |              | 0.835        |
| Dapivirine vaginal ring                    | 132 (67.0)   | 69 (66.4)              | 63 (67.7)    |              |
| Placebo                                    | 65 (33.0)    | 35 (33.6)              | 30 (32.3)    |              |
| Age (years)                                |              |                        |              | 0.275        |
| 18-24                                      | 66 (33.5)    | 30 (28.8)              | 36 (38.7)    |              |
| 25-34                                      | 98 (49.8)    | 57 (54.8)              | 41 (44.1)    |              |
| 35+                                        | 33 (16.7)    | 17 (16.4)              | 16 (17.2)    |              |
| Education level                            |              |                        |              | 0.276        |
| Incomplete primary school                  | 68 (34.5)    | 37 (35.6)              | 31 (33.3)    |              |
| Complete primary school                    | 105 (53.3)   | 58 (55.8)              | 47 (50.5)    |              |
| Secondary school*                          | 24 (12.2)    | 9 (8.6)                | 15 (16.1)    |              |
| Marital status                             |              |                        |              | <b>0.020</b> |
| Single and never married                   | 90 (45.7)    | 38 (36.5)              | 52 (55.9)    |              |
| Single but previously married              | 25 (12.7)    | 14 (13.5)              | 11 (11.8)    |              |
| Married                                    | 82 (41.6)    | 52 (50.0)              | 30 (32.3)    |              |
| Number of life time sex partners           |              |                        |              | <b>0.002</b> |
| Median (IQR)                               | 6 (4-12)     | 5 (3-9)                | 8 (5-20)     |              |
| Has main partner                           |              |                        |              | 0.194        |
| No                                         | 35 (17.8)    | 15 (14.4)              | 20 (21.5)    |              |
| Yes                                        | 162 (82.2)   | 89 (85.6)              | 73 (78.5)    |              |
| Duration lived with main partner (years)   |              |                        |              | 0.690        |
| <1                                         | 35 (21.6)    | 17 (19.1)              | 18 (24.7)    |              |
| 1-2                                        | 34 (21.0)    | 19 (21.3)              | 15 (20.5)    |              |
| 3+                                         | 93 (57.4)    | 53 (59.6)              | 40 (54.8)    |              |
| Lived with (main) partner in the past year |              |                        |              | 0.171        |
| All the time                               | 48 (37.8)    | 38 (42.7)              | 24 (32.9)    |              |
| Some of the time                           | 14 (11.0)    | 7 (7.9)                | 12 (16.4)    |              |
| No                                         | 65 (51.2)    | 44 (49.4)              | 37 (50.7)    |              |
| Currently lives with main partner          |              |                        |              | 0.376        |
| No                                         | 87 (53.7)    | 45 (50.6)              | 42 (57.5)    |              |
| Yes                                        | 75 (46.3)    | 44 (49.4)              | 31 (42.5)    |              |

|                                                                |            |            |           |              |
|----------------------------------------------------------------|------------|------------|-----------|--------------|
| Unprotected sex with multiple/new partner in the past 3 months |            |            |           |              |
| No                                                             | 38 (19.3)  | 18 (17.3)  | 20 (21.5) | 0.456        |
| Yes                                                            | 159 (80.7) | 86 (82.7)  | 73 (78.5) |              |
| Drug/alcohol use in the past 3 months                          |            |            |           |              |
| No                                                             | 48 (24.4)  | 32 (30.8)  | 16 (17.2) | <b>0.027</b> |
| Yes                                                            | 149 (75.6) | 72 (69.2)  | 77 (82.8) |              |
| Baseline STI/BV status                                         |            |            |           |              |
| TV                                                             |            |            |           |              |
| Negative                                                       | 121 (61.4) | 61 (58.7)  | 60 (64.5) | 0.399        |
| Positive                                                       | 76 (38.6)  | 43 (41.3)  | 33 (35.5) |              |
| NG                                                             |            |            |           |              |
| Negative                                                       | 173 (87.8) | 92 (88.5)  | 81 (87.1) | 0.770        |
| Positive                                                       | 24 (12.2)  | 12 (11.5)  | 12 (12.9) |              |
| CT                                                             |            |            |           |              |
| Negative                                                       | 177 (89.8) | 97 (93.3)  | 80 (86.0) | 0.093        |
| Positive                                                       | 20 (10.2)  | 7 (6.7)    | 13 (14.0) |              |
| BV                                                             |            |            |           |              |
| Negative                                                       | 191 (96.9) | 102 (53.4) | 89 (46.6) | 0.332        |
| Positive                                                       | 6 (3.1)    | 2 (33.3)   | 4 (66.7)  |              |

n=Number; \*Includes one woman who had greater than secondary education, TV- *Trichomonas vaginalis*, NG-*Neisseria gonorrhoea*, CT-*Chlamydia trachomatis*, BV-Bacterial vaginosis

### Proportion of women reporting intravaginal practices (IVP)

Ninety-three (47.2%) women reported at least one form of IVP. The commonly used substances to clean the vagina included: soap (n=76, 81.7%), cloth (n=5, 5.4%), and others (honey, herbs, perfume n=12, 12.9%). Reported IVP were more common among single and never married women compared to single but previously married or currently married women (p=0.020), among those with more sex partners (p=0.002) and those who used drugs/alcohol in the past 3 months (p= 0.027) (Table 1).

### Proportion and rate of STIs/BV

A total of 172 (87.3%) women were diagnosed with an STI/BV at least once during follow up, with an overall single-event-per participant incidence rate of 51.9 per 100 pyrs. The overall incidence rate for HIV was 5.8 per 100 pyrs. The most common STI was TV (73.6%, n=145/197 diagnosed at least once) with a rate of 92.7 per 100 pyrs in the single-event-per-participant analysis (Table 2).

### Associations between IVP and rate of STIs/BV

In the single-event-per-participant analysis, STI/BV and HIV rates were not associated with reported IVP (Table 2). However, in the multiple-events-per participant analysis, the rate of CT was statistically significantly lower among women who reported IVP versus those who did not ( $p=0.030$ ). On stratification by trial arm, the rate of NG was higher in the DVR arm compared to the placebo arm in both the single and multiple-events-per participant analysis among women not using IVP ( $p=0.024$  and  $p=0.007$  respectively) (Table 3). After adjusting for participant baseline characteristics, overall, in the multiple-event per participant analyses, IVP was only associated with lower rates of CT among women in the placebo arm [adjusted rate ratio (aRR)=0.33, 95% CI 0.14-0.78] (Table 3).

**Table 2: Associations between intravaginal practices and rate of sexually transmitted infection/Bacterial vaginosis among women in the Ring Study in southwestern Uganda**

| Sexually transmitted infection/condition | Single-event-per-participant analysis |                              |                             |          |                  |                  |
|------------------------------------------|---------------------------------------|------------------------------|-----------------------------|----------|------------------|------------------|
|                                          | Overall<br>Rate/100 PYR (95% CI)      | Intravaginal practices       |                             | p-value* | uRR (95% CI)     | aRR (95% CI)     |
|                                          |                                       | Yes<br>Rate/100 PYR (95% CI) | No<br>Rate/100 PYR (95% CI) |          |                  |                  |
| HIV                                      | 5.8 (3.0-11.1)                        | 7.0 (2.9-17.0)               | 4.7 (1.8-12.4)              | 0.278    | 1.51 (0.39-5.81) | 1.29 (0.29-5.67) |
| <i>Trichomonas vaginalis</i>             | 92.7 (78.7-109.0)                     | 97.4 (76.9-123.3)            | 88.7 (70.9-111.1)           | 0.288    | 1.10 (0.79-1.52) | 1.10 (0.67-1.63) |
| <i>Neisseria gonorrhoea</i>              | 23.4 (18.3-29.9)                      | 22.8 (15.9-32.9)             | 23.8 (17.0-33.4)            | 0.435    | 0.96 (0.58-1.57) | 0.99 (0.56-1.79) |
| <i>Chlamydia trachomatis</i>             | 28.4 (22.7-35.6)                      | 27.9 (20.2-38.8)             | 28.9 (21.2-39.4)            | 0.446    | 0.97 (0.62-1.52) | 0.83 (0.50-1.38) |
| Bacterial vaginosis                      | 14.1 (10.6-18.6)                      | 13.4 (8.9-20.4)              | 14.7 (10.1-21.4)            | 0.383    | 0.92 (0.52-1.61) | 1.13 (0.53-2.37) |
| Multiple-events-per-participant analysis |                                       |                              |                             |          |                  |                  |
| <i>Trichomonas vaginalis</i>             | 88.9 (79.6-99.5)                      | 90.2 (76.8-106.0)            | 87.9 (75.3-102.5)           | 0.406    | 1.03 (0.77-1.37) | 1.07 (0.80-1.43) |
| <i>Neisseria gonorrhoea</i>              | 28.4 (23.3-34.6)                      | 28.7 (21.5-38.1)             | 28.2 (21.5-37.0)            | 0.935    | 1.02 (0.61-1.69) | 0.99 (0.59-1.67) |
| <i>Chlamydia trachomatis</i>             | 43.6 (37.2-51.1)                      | 36.6 (28.4-47.1)             | 49.9 (40.7-61.2)            | 0.030    | 0.73 (0.45-1.20) | 0.64 (0.38-1.05) |
| Bacterial vaginosis                      | 18.8 (11.1-31.7)                      | 12.1 (4.5-32.2)              | 24.1 (13.0-44.8)            | 0.124    | 0.51 (0.13-1.95) | 0.48 (0.16-1.47) |

PYR = person-years at risk; CI = Confidence interval; aRR = adjusted rate ratio; ¶Adjusted for age, trial arm, STI/BV at baseline, \* Unadjusted p-value comparing the rate of each STI between IVP use and none use

**Table 3: Associations between intravaginal practices and rate of sexually transmitted infection/Bacterial vaginosis stratified by trial arm among women in the Ring Study in southwestern Uganda**

| Single-event-per-participant analysis    |         |                       |                       |          |                       |                           |
|------------------------------------------|---------|-----------------------|-----------------------|----------|-----------------------|---------------------------|
| Sexually transmitted infection/condition | Overall | Trial arm             |                       | p-value* | aRR (DVR)<br>(95% CI) | aRR (Placebo)<br>(95% CI) |
|                                          |         | DVR                   | Placebo               |          |                       |                           |
|                                          | IVP use | Rate/100 PYR (95% CI) | Rate/100 PYR (95% CI) |          |                       |                           |
| HIV                                      | No      | 3.3 (0.8-12.9)        | 8.4 (2.1-33.8)        | 0.374    | -                     | -                         |
|                                          | Yes     | 8.8 (3.3-23.5)        | 3.9 (0.6-27.9)        | 0.518    | -                     | -                         |
| <i>Trichomonas vaginalis</i>             | No      | 77.5 (58.4-102.8)     | 118.3 (81.6-171.3)    | 0.081    | 1.00                  | 1.00                      |
|                                          | Yes     | 105.8 (79.7-140.4)    | 82.4 (53.7-126.4)     | 0.171    | 1.34 (0.78-2.31)      | 0.59 (0.28-1.26)          |
| <i>Neisseria gonorrhoea</i>              | No      | 30.5 (21.1- 44.2)     | 11.8 (5.3-26.2)       | 0.024    | 1.0                   |                           |
|                                          | Yes     | 20.6 (13.0-32.6)      | 28.0 (15.5-50.5)      | 0.211    | 0.73 (0.35-1.53)      | 1.88 (0.49-7.20)          |
| <i>Chlamydia trachomatis</i>             | No      | 28.5 (19.4-41.9)      | 29.5 (17.5-49.8)      | 0.911    | 1.00                  | 1.00                      |
|                                          | Yes     | 29.7 (20.2-43.6)      | 24.3 (13.1-45.2)      | 0.305    | 1.09 (0.60-2.00)      | 0.37 (0.11-1.36)          |
| Bacterial vaginosis                      | No      | 13.7 (8.6-22.1)       | 16.5 (8.9-30.7)       | 0.636    | 1.00                  | 1.00                      |
|                                          | Yes     | 12.6 (7.5-21.3)       | 15.2 (7.6-30.3)       | 0.332    | 0.74 (0.26-2.09)      | 1.51 (0.35-6.52)          |
| Multiple-events-per-participant analysis |         |                       |                       |          |                       |                           |
| <i>Trichomonas vaginalis</i>             | No      | 87.2 (72.2-105.3)     | 89.2 (68.3-116.5)     | 0.558    | 1.00                  | 1.00                      |
|                                          | Yes     | 94.4 (77.9-114.2)     | 81.5 (60.5-109.9)     | 0.213    | 1.12 (0.80-1.56)      | 0.76 (0.44-1.30)          |
| <i>Neisseria gonorrhoea</i>              | No      | 34.7 (25.8-46.8)      | 14.9 (7.7-28.6)       | 0.007    | 1.00                  | 1.00                      |
|                                          | Yes     | 25.2 (17.4-36.4)      | 36.0 (23.0-56.5)      | 0.116    | 0.74 (0.42-1.30)      | 2.24 (0.61-8.31)          |
| <i>Chlamydia trachomatis</i>             | No      | 56.5 (44.7-71.5)      | 36.3 (24.0-55.2)      | 0.065    | 1.00                  | 1.00                      |
|                                          | Yes     | 40.4 (30.2-54.2)      | 28.4 (17.1-47.2)      | 0.126    | 0.75 (0.43-1.29)      | 0.33 (0.14-0.78)          |
| Bacterial vaginosis                      | No      | 20.5 (9.2-45.7)       | 32.7 (12.3-87.0)      | 0.482    | 1.00                  | 1.00                      |
|                                          | Yes     | 12.5 (4.0-38.7)       | 11.1 (1.6-78.7)       | 0.491    | 0.64 (0.11-3.71)      | 0.39 (0.10-2.72)          |

PYR = person-years at risk; CI = Confidence interval; uRR = unadjusted rate ratio; aRR = adjusted rate ratio; †Adjusted for age, and STI/BV at baseline, \* compares rates for IVP (yes or no) between DVR and placebo

## DISCUSSION

Our study aimed to assess associations between IVP and incidence of STIs including HIV, and BV among women using the DVR or placebo. Overall, we found that nearly one in every two women practiced at least one form of IVP. IVP is reported to be high in African women with proportions of between 30-50%, and even higher among women at high risk of acquiring HIV.[31, 32] Generally, IVP in this population is driven by cultural and social norms as well as the need for personal hygiene in relation to sexual health and relationships.[33] Women recruited in our study were those engaging in transactional sex and are thus expected to present themselves to their male partners in a fresh vaginal state.[34, 35] The frequency of IVP amongst women involved in transactional sex may be influenced by the need to remain clean/fresh coupled with worries about HIV infection. Prior studies in Uganda and Tanzania showed that a higher frequency of sex was associated with more frequent engagement with IVP. [25, 36, 37]

The prevalence of STIs/BV in our study population was high confirming the fact that the women were at very high risk of HIV infection. More events were reported among single women and those who did not live with a main partner and those with more sex partners. Women at high risk of HIV infection engage in transactional sex and have multiple partners, that puts them at higher risk of acquiring STIs/BV. Those who were single also engaged more in IVP. Earlier studies showed that women engaging in high frequency of sex require to present themselves as clean to their male partners. [14, 34] IVP is generally practiced for hygiene purposes and sexuality. [15, 16] IVP has been associated with changes in vaginal flora and resulting BV. The latter is associated with increased susceptibility to STIs including HIV. [17] The interaction between BV and STIs including HIV has been well documented with each causing genital inflammation. [38] It is reported that organisms associated with BV may overgrow as a result of increased vaginal pH brought about by substances that may be used for IVP like soaps which most of the women in our study used. With increased pH, the protective Lactobacilli species are replaced by pathogenic organisms resulting in BV. [19, 20] The products used may cause genital lesions enabling the transmission of STIs.[17]

We observed a high incidence of STIs in this population, with the commonest STI being TV. TV is reported to be prevalent among women engaging in transactional sex with high proportions reported globally (16%) and the African region contributing even higher proportions (23%).[39] TV has also been associated with BV especially among women that use cloth for IVP as these act as fomites.[21]

1  
2  
3 Although the incidence of STIs was high, we did not see any significant difference in the rise in incidence  
4 of STIs/BV among women using IVP compared to those who did not, except for CT that was lower. It is  
5 not clear and has not been documented that IVP reduces the risk of acquiring STIs/BV, though the reverse  
6 has been reported. IVP causes changes to vaginal flora resulting in increased risk of STIs/BV including  
7 HIV. A recent systematic review found that IVP increased the risk of vaginal infections (BV, TV, and  
8 vulvovaginal candidiasis),[40] two others found no association between IVP and TV[15] or BV.[41]  
9 One study in South Africa found that IVP was associated with increased risk of HIV infection but not  
10 other STIs.[42] The fact that IVP results in BV, organisms related with BV have been associated with  
11 the production of metabolites that are used by STIs like CT as growth factors enabling their  
12 multiplication.[43] Incidence of CT has been reported to be high among women (5 per 100pyrs),  
13 especially among younger women (27.6 per 100 pyrs) in Kenya, but not associated with vaginal  
14 washing.[44]

15  
16 We also found that women not using IVP, but using the DVR had higher rates of NG  
17 compared to those in the placebo arm. Women in this study generally had high rates of STIs. We have  
18 previously reported that rates of STIs decreased over time in the same cohort of women.[45] Apart from  
19 lower rates of CT among women using the placebo vaginal ring, there was no statistically significant  
20 association between the DVR microbicide and STI/BV including HIV rates among those using IVP. The  
21 DVR has been associated with minimal changes in the vaginal microbiota that were likely not clinically  
22 significant.[46] It has generally been found to be well tolerated in adult as well as adolescent girls and  
23 young women.[47, 48] Various studies on microbicides have reported that their use may result in little  
24 or no difference in the risk of acquiring STIs like CT, NG or TV.[49] In the Buffer Gel microbicide study  
25 for example, no significant changes in colonization with *Lactobacillus* species was reported.[50]

26  
27 The strengths of this study included the opportunity to investigate multiple STIs and BV in the  
28 same population and the ability to collect recurrent data on genital conditions which allowed for conduct  
29 of both single-event-per-participant and multiple-event-per-participant analyses. The multiple-event-per-  
30 participant analysis models the total rate of events over the entire follow-up period and has more power  
31 for detecting associations compared to the single-event-per-participant analysis. [51] This analysis is also  
32 more clinically relevant because STI re-infection and BV recurrence are common.

33  
34 A limitation of the study was the small sample size which may have impacted the study power  
35 and consequently the ability to detect any differences in STI/BV rates between women who reported IVP

1  
2  
3 and those who did not. Additionally, no confirmatory tests were done to confirm absence of an STI/BV  
4 prior to DVR insertion. However, duration of treatment and absence of symptoms and signs were used  
5 as a proxy for lack of an STI/BV. Furthermore, it was not possible to measure and evaluate any versus  
6 no IVP. This is challenging to do as different types of IVP and materials used affect the risk of HIV, STI  
7 and BV risk. This has also not been possible to measure in previous studies.  
8  
9  
10  
11

12 In conclusion, we found a high prevalence of IVP and incidence of STIs/BV among women  
13 enrolled in the Ring Study in Uganda. IVP did not statistically significantly increase STI/BV rates.  
14 Implying that women who practice intravaginal cleansing/insertion could continue using these practices  
15 in the presence of the microbicide. However, our results should be interpreted with caution because of a  
16 limitation in sample size that could generate a hypothesis and not conclusively test it. An analysis with  
17 a bigger sample size could be helpful to better understand whether there is a link between use of the  
18 DVR, IVP, and incidence of STIs/BV.  
19  
20  
21  
22  
23  
24  
25  
26

## 27 **Acknowledgements**

28  
29 International Partnership for Microbicides' (a not-for-profit product-development partnership) work is  
30 made possible by generous support from many donors including: the Bill and Melinda Gates  
31 Foundation, Irish Aid, the Ministry of Foreign Affairs of Denmark, the Ministry of Foreign Affairs of  
32 the Netherlands, the Norwegian Agency for Development Cooperation, the U.K. Department for  
33 International Development, the American people through the U.S. Agency for International  
34 Development, and the President's Emergency Plan for AIDS Relief. We thank the study team who  
35 worked tirelessly in planning, recruitment and data collection for this study.  
36  
37  
38  
39  
40  
41  
42

43 **Competing interests:** All authors declare that they have no conflict of interest.  
44  
45

46 **Funding:** This work was supported by the International Partnership for Microbicides  
47 ([www.ipmglobal.org](http://www.ipmglobal.org)), grant number (IND # 110,659).  
48  
49  
50

## 51 **Author Contributions:**

52 SK, AA, ER designed the study and wrote the initial manuscript draft, and AA did the data analysis.  
53 KA and MO conducted the study while SK directed the work. KA and MO contributed to the writing  
54  
55  
56  
57  
58  
59  
60



1  
2  
3 and editing of the manuscript. All authors contributed to the interpretation of the results and critically  
4 commented and provided revisions to the manuscript. All authors approved the final version of the  
5 manuscript. The corresponding author attests that all listed authors meet authorship criteria and that no  
6 others meeting the criteria have been omitted.  
7  
8  
9

10  
11  
12 **Data availability statement:** Data are available on reasonable request.  
13  
14  
15  
16  
17  
18  
19  
20  
21  
22  
23  
24  
25  
26  
27  
28  
29  
30  
31  
32  
33  
34  
35  
36  
37  
38  
39  
40  
41  
42  
43  
44  
45  
46  
47  
48  
49  
50  
51  
52  
53  
54  
55  
56  
57  
58  
59  
60

For peer review only

## References

1. World Health Organization. Report on global sexually transmitted infection surveillance 2018. 2018. Report No.: 9241565691.
2. Unemo M, Bradshaw CS, Hocking JS, de Vries HJC, Francis SC, Mabey D, et al. Sexually transmitted infections: challenges ahead. *The Lancet Infectious Diseases*. 2017;17(8):e235-e79.
3. Torrone EA, Morrison CS, Chen P-L, Kwok C, Francis SC, Hayes RJ, et al. Prevalence of sexually transmitted infections and bacterial vaginosis among women in sub-Saharan Africa: an individual participant data meta-analysis of 18 HIV prevention studies. *PLoS medicine*. 2018;15(2):e1002511.
4. Awungafac G, Delvaux T, Vuylsteke B. Systematic review of sex work interventions in sub-Saharan Africa: examining combination prevention approaches. *Tropical Medicine & International Health*. 2017;22(8):971-93.
5. Bayigga L, Kateete DP, Anderson DJ, Sekikubo M, Nakanjako D. Diversity of vaginal microbiota in sub-Saharan Africa and its effects on HIV transmission and prevention. *American journal of obstetrics and gynecology*. 2019;220(2):155-66.
6. Bautista CT, Wurapa E, Sateren WB, Morris S, Hollingsworth B, Sanchez JL. Bacterial vaginosis: a synthesis of the literature on etiology, prevalence, risk factors, and relationship with chlamydia and gonorrhea infections. *Military Medical Research*. 2016;3:4.
7. Wang J. Bacterial vaginosis. Primary care update for OB/GYNS. 2000;7(5):181-5.
8. Rao D, Pindi D, Rani D, Sasikala D, Kawle D. Diagnosis of bacterial vaginosis: Amsel's Criteria vs Nugent's scoring. *Sch J Appl Med Sci*. 2016;4(6):2027-31.
9. Spurbeck RR, Arvidson CG. Lactobacilli at the front line of defense against vaginally acquired infections. *Future microbiology*. 2011;6(5):567-82.
10. Boskey E, Telsch K, Whaley K, Moench T, Cone R. Acid production by vaginal flora in vitro is consistent with the rate and extent of vaginal acidification. *Infection and immunity*. 1999;67(10):5170-5.
11. Atassi F, Brassart D, Grob P, Graf F, Servin AL. Lactobacillus strains isolated from the vaginal microbiota of healthy women inhibit *Prevotella bivia* and *Gardnerella vaginalis* in coculture and cell culture. *FEMS Immunology & Medical Microbiology*. 2006;48(3):424-32.
12. Saigh JH, Sanders CC, Sanders Jr WE. Inhibition of *Neisseria gonorrhoeae* by aerobic and facultatively anaerobic components of the endocervical flora: evidence for a protective effect against infection. *Infection and immunity*. 1978;19(2):704-10.
13. Van De Wijgert J, Mason PR, Gwanzura L, Mbizvo MT, Chirenje Z, Iliff V, et al. Intravaginal practices, vaginal flora disturbances, and acquisition of sexually transmitted diseases in Zimbabwean women. *The Journal of infectious diseases*. 2000;181(2):587-94.
14. Martin Hilber A. Women's health, hygiene and HIV in Sub-Saharan Africa: The role of vaginal practices: Ghent University; 2012.
15. Hilber AM, Francis SC, Chersich M, Scott P, Redmond S, Bender N, et al. Intravaginal practices, vaginal infections and HIV acquisition: systematic review and meta-analysis. *PloS one*. 2010;5(2):e9119.
16. Woodson C, Alleman P. Sexual pleasure, gender power and microbicide acceptability in Zimbabwe and Malawi. *AIDS Education and Prevention*. 2008;20(2):171.
17. World Health Organization. A multi-country study on gender, sexuality and vaginal practices: Implications for sexual health 2012 [Available from: <https://www.jstor.org/stable/resrep28254>].

18. Alcaide ML, Rodriguez VJ, Fischl MA, Jones DL, Weiss SM. Addressing intravaginal practices in women with HIV and at-risk for HIV infection, a mixed methods pilot study. *International journal of women's health*. 2017;9:123-32.
19. Low N, Chersich MF, Schmidlin K, Egger M, Francis SC, van de Wijgert JH, et al. Intravaginal practices, bacterial vaginosis, and HIV infection in women: individual participant data meta-analysis. *PLoS medicine*. 2011;8(2):e1000416.
20. van de Wijgert JH. The vaginal microbiome and sexually transmitted infections are interlinked: consequences for treatment and prevention. *PLoS medicine*. 2017;14(12):e1002478.
21. Eshete A, Mekonnen Z, Zeynudin A. *Trichomonas vaginalis* infection among pregnant women in Jimma university specialized hospital, southwest Ethiopia. *International Scholarly Research Notices*. 2013;2013.
22. Van Der Pol B, Kwok C, Pierre-Louis B, Rinaldi A, Salata RA, Chen P-L, et al. *Trichomonas vaginalis* infection and human immunodeficiency virus acquisition in African women. *The Journal of infectious diseases*. 2008;197(4):548-54.
23. McClelland RS, Sangaré L, Hassan WM, Lavreys L, Mandaliya K, Kiarie J, et al. Infection with *Trichomonas vaginalis* increases the risk of HIV-1 acquisition. *The Journal of infectious diseases*. 2007;195(5):698-702.
24. Chersich M, Hilber AM, Schmidlin K, Egger M, Francis S, Baeten J, et al. Association between intravaginal practices and HIV acquisition in women: individual patient data meta-analysis of cohort studies in sub-Saharan Africa. 5th IAS Conference on HIV Pathogenesis, Treatment and Prevention 2009.
25. Francis SC, Baisley K, Lees SS, Andrew B, Zalwango F, Seeley J, et al. Vaginal practices among women at high risk of HIV infection in Uganda and Tanzania: recorded behaviour from a daily pictorial diary. *PloS one*. 2013;8(3):e59085.
26. Nel A, van Niekerk N, Kapiga S, Bekker LG, Gama C, Gill K, et al. Safety and Efficacy of a Dapivirine Vaginal Ring for HIV Prevention in Women. *The New England journal of medicine*. 2016;375(22):2133-43.
27. Baeten JM, Palanee-Phillips T, Brown ER, Schwartz K, Soto-Torres LE, Govender V, et al. Use of a vaginal ring containing dapivirine for HIV-1 prevention in women. *New England Journal of Medicine*. 2016;375(22):2121-32.
28. Nel A, van Niekerk N, Van Baelen B, Malherbe M, Mans W, Carter A, et al. Safety, adherence, and HIV-1 seroconversion among women using the dapivirine vaginal ring (DREAM): an open-label, extension study. *The lancet HIV*. 2021;8(2):e77-e86.
29. Kusemererwa S, Abaasa A, Onyango M, Nel AM, Isaacs M, Asiki G. Contraceptive preference among women at risk of HIV acquisition in a preparatory screening study for a phase III microbicide trial in South Western Uganda. *AIDS and behavior*. 2018;22(1):131-8.
30. Sexually Transmitted Diseases Treatment Guidelines, (2010).
31. Myer L, Kuhn L, Stein ZA, Wright TC, Jr., Denny L. Intravaginal practices, bacterial vaginosis, and women's susceptibility to HIV infection: epidemiological evidence and biological mechanisms. *The Lancet Infectious diseases*. 2005;5(12):786-94.
32. Fonck K, Kaul R, Keli F, Bwayo JJ, Ngugi EN, Moses S, et al. Sexually transmitted infections and vaginal douching in a population of female sex workers in Nairobi, Kenya. *Sexually Transmitted Infections*. 2001;77(4):271-5.
33. Lees S, Zalwango F, Andrew B, Vandepitte J, Seeley J, Hayes RJ, et al. Understanding motives for intravaginal practices amongst Tanzanian and Ugandan women at high risk of HIV infection: The embodiment of social and cultural norms and well-being. *Social Science & Medicine*. 2014;102:165-73.
34. Hull T, Hilber AM, Chersich MF, Bagnol B, Prohm A, Smit JA, et al. Prevalence, motivations, and adverse effects of vaginal practices in Africa and Asia: findings from a multicountry household survey. *Journal of women's health*. 2011;20(7):1097-109.

- 1
- 2
- 3
- 4 35. Martin Hilber A, Kenter E, Redmond S, Merten S, Bagnol B, Low N, et al. Vaginal practices as women's
- 5 agency in Sub-Saharan Africa: A synthesis of meaning and motivation through meta-ethnography. *Social*
- 6 *Science & Medicine*. 2012;74(9):1311-23.
- 7 36. Allen CF, Desmond N, Chiduo B, Medard L, Lees SS, Vallely A, et al. Intravaginal and menstrual practices
- 8 among women working in food and recreational facilities in Mwanza, Tanzania: implications for microbicide
- 9 trials. *AIDS and behavior*. 2010;14:1169-81.
- 10 37. Gafos M, Pool R, Mzimela MA, Ndlovu HB, McCormack S, Elford J, et al. The implications of post-coital
- 11 intravaginal cleansing for the introduction of vaginal microbicides in South Africa. *AIDS and behavior*.
- 12 2014;18:297-310.
- 13 38. Masson L, Arnold KB, Little F, Mlisana K, Lewis DA, Mkhize N, et al. Inflammatory cytokine biomarkers
- 14 to identify women with asymptomatic sexually transmitted infections and bacterial vaginosis who are at high
- 15 risk of HIV infection. *Sexually transmitted infections*. 2016;92(3):186-93.
- 16 39. Mirzadeh M, Olfatifar M, Eslahi AV, Abdoli A, Houshmand E, Majidani H, et al. Global prevalence of
- 17 *Trichomonas vaginalis* among female sex workers: a systematic review and meta-analysis. *Parasitology*
- 18 *research*. 2021;120(7):2311-22.
- 19 40. Umami A, Paulik E, Molnár R, Bhisma M. The relationship between genital hygiene behaviors and
- 20 genital infections among women: A systematic review. *Jurnal Ners*. 2022;17(1):89-101.
- 21 41. Daher A, Albaini O, Siff L, Farah S, Jallad K. Intimate hygiene practices and reproductive tract infections:
- 22 A systematic review. *Gynecology and Obstetrics Clinical Medicine*. 2022.
- 23 42. Myer L, Denny L, WRIGHT JR TC, DE SOUZA M, BARONE MA, Kuhn L. Intravaginal practices, HIV and
- 24 other sexually transmitted diseases among South African women. *Sexually Transmitted Diseases*. 2004:174-9.
- 25 43. Mwatelah R, McKinnon LR, Baxter C, Abdool Karim Q, Abdool Karim SS. Mechanisms of sexually
- 26 transmitted infection-induced inflammation in women: implications for HIV risk. *Journal of the International*
- 27 *AIDS Society*. 2019;22:e25346.
- 28 44. Masese L, Baeten JM, Richardson BA, Deya R, Kabare E, Bukusi E, et al. Incidence and correlates of
- 29 *Chlamydia trachomatis* infection in a high-risk cohort of Kenyan women. *Sex Transm Dis*. 2013;40(3):221-5.
- 30 45. Kusemererwa S, Abaasa A, Kabarambi A, Onyango M, Mugisha JO. Assessment of risk compensation
- 31 following use of the dapivirine vaginal ring in southwestern Uganda. *Sexually transmitted infections*. 2021.
- 32 46. Austin MN, Meyn LA, Avolia HA, Petrina MA, Cosentino LA, Alphonse C, et al. Impact of Dapivirine and
- 33 Placebo Vaginal Rings on the Microbiota of Adolescent, Lactating, and Postmenopausal Females. *The Journal of*
- 34 *infectious diseases*. 2022;225(12):2208-18.
- 35 47. Zuend CF, Noël-Romas L, Hoger S, McCorriser S, Westmacott G, Marrazzo J, et al. Influence of
- 36 dapivirine vaginal ring use on cervicovaginal immunity and functional microbiome in adolescent girls. *AIDS*
- 37 (London, England). 2021;35(3):369.
- 38 48. Nel A, Haazen W, Nuttall J, Romano J, Rosenberg Z, van Niekerk N. A safety and pharmacokinetic trial
- 39 assessing delivery of dapivirine from a vaginal ring in healthy women. *AIDS*. 2014;28(10):1479-87.
- 40 49. Obiero J, Ogongo P, Mwethera PG, Wiysonge CS. Topical microbicides for preventing sexually
- 41 transmitted infections. *The Cochrane database of systematic reviews*. 2021;3(3):Cd007961.
- 42 50. Clarke JG, Peipert JF, Hillier SL, Heber W, Boardman L, Moench TR, et al. Microflora changes with the
- 43 use of a vaginal microbicide. *Sexually transmitted diseases*. 2002:288-93.
- 44 51. Juarez-Colunga E, Rosenfeld M, Zemanick ET, Wagner B. Application of multiple event analysis as an
- 45 alternative approach to studying pulmonary exacerbations as an outcome measure. *Journal of Cystic Fibrosis*.
- 46 2020;19(1):114-8.
- 47
- 48
- 49
- 50
- 51
- 52
- 53
- 54
- 55
- 56
- 57
- 58
- 59

## STROBE Statement—checklist of items that should be included in reports of observational studies

|                              | Item No | Recommendation                                                                                                                                                                                                                                                                                                                                                                                                                                                         | Page No |
|------------------------------|---------|------------------------------------------------------------------------------------------------------------------------------------------------------------------------------------------------------------------------------------------------------------------------------------------------------------------------------------------------------------------------------------------------------------------------------------------------------------------------|---------|
| <b>Title and abstract</b>    | 1       | (a) Indicate the study's design with a commonly used term in the title or the abstract                                                                                                                                                                                                                                                                                                                                                                                 | 2       |
|                              |         | (b) Provide in the abstract an informative and balanced summary of what was done and what was found                                                                                                                                                                                                                                                                                                                                                                    | 2       |
| <b>Introduction</b>          |         |                                                                                                                                                                                                                                                                                                                                                                                                                                                                        |         |
| Background/rationale         | 2       | Explain the scientific background and rationale for the investigation being reported                                                                                                                                                                                                                                                                                                                                                                                   | 4, 5    |
| Objectives                   | 3       | State specific objectives, including any prespecified hypotheses                                                                                                                                                                                                                                                                                                                                                                                                       | 4, 5    |
| <b>Methods</b>               |         |                                                                                                                                                                                                                                                                                                                                                                                                                                                                        |         |
| Study design                 | 4       | Present key elements of study design early in the paper                                                                                                                                                                                                                                                                                                                                                                                                                | 5       |
| Setting                      | 5       | Describe the setting, locations, and relevant dates, including periods of recruitment, exposure, follow-up, and data collection                                                                                                                                                                                                                                                                                                                                        | 5, 6    |
| Participants                 | 6       | (a) <i>Cohort study</i> —Give the eligibility criteria, and the sources and methods of selection of participants. Describe methods of follow-up<br><i>Case-control study</i> —Give the eligibility criteria, and the sources and methods of case ascertainment and control selection. Give the rationale for the choice of cases and controls<br><i>Cross-sectional study</i> —Give the eligibility criteria, and the sources and methods of selection of participants | 5, 6    |
|                              |         | (b) <i>Cohort study</i> —For matched studies, give matching criteria and number of exposed and unexposed<br><i>Case-control study</i> —For matched studies, give matching criteria and the number of controls per case                                                                                                                                                                                                                                                 | NA      |
| Variables                    | 7       | Clearly define all outcomes, exposures, predictors, potential confounders, and effect modifiers. Give diagnostic criteria, if applicable                                                                                                                                                                                                                                                                                                                               | 6, 7    |
| Data sources/<br>measurement | 8*      | For each variable of interest, give sources of data and details of methods of assessment (measurement). Describe comparability of assessment methods if there is more than one group                                                                                                                                                                                                                                                                                   | 6, 7    |
| Bias                         | 9       | Describe any efforts to address potential sources of bias                                                                                                                                                                                                                                                                                                                                                                                                              | 6, 7    |
| Study size                   | 10      | Explain how the study size was arrived at                                                                                                                                                                                                                                                                                                                                                                                                                              | 5, 6    |
| Quantitative variables       | 11      | Explain how quantitative variables were handled in the analyses. If applicable, describe which groupings were chosen and why                                                                                                                                                                                                                                                                                                                                           | 6, 7    |
| Statistical methods          | 12      | (a) Describe all statistical methods, including those used to control for confounding                                                                                                                                                                                                                                                                                                                                                                                  | 7       |
|                              |         | (b) Describe any methods used to examine subgroups and interactions                                                                                                                                                                                                                                                                                                                                                                                                    | NA      |
|                              |         | (c) Explain how missing data were addressed                                                                                                                                                                                                                                                                                                                                                                                                                            | NA      |
|                              |         | (d) <i>Cohort study</i> —If applicable, explain how loss to follow-up was addressed<br><i>Case-control study</i> —If applicable, explain how matching of cases and controls was addressed<br><i>Cross-sectional study</i> —If applicable, describe analytical methods taking account of sampling strategy                                                                                                                                                              | NA      |
|                              |         | (e) Describe any sensitivity analyses                                                                                                                                                                                                                                                                                                                                                                                                                                  | 7       |

Continued on next page

| <b>Results</b>           |     |                                                                                                                                                                                                              | <b>Page</b>    |
|--------------------------|-----|--------------------------------------------------------------------------------------------------------------------------------------------------------------------------------------------------------------|----------------|
| Participants             | 13* | (a) Report numbers of individuals at each stage of study—eg numbers potentially eligible, examined for eligibility, confirmed eligible, included in the study, completing follow-up, and analysed            | 9, 10, 11      |
|                          |     | (b) Give reasons for non-participation at each stage                                                                                                                                                         | NA             |
|                          |     | (c) Consider use of a flow diagram                                                                                                                                                                           | NA             |
| Descriptive data         | 14* | (a) Give characteristics of study participants (eg demographic, clinical, social) and information on exposures and potential confounders                                                                     | 9, 10, 11      |
|                          |     | (b) Indicate number of participants with missing data for each variable of interest                                                                                                                          | NA             |
|                          |     | (c) <i>Cohort study</i> —Summarise follow-up time (eg, average and total amount)                                                                                                                             |                |
| Outcome data             | 15* | <i>Cohort study</i> —Report numbers of outcome events or summary measures over time                                                                                                                          | 11, 12, 13, 14 |
|                          |     | <i>Case-control study</i> —Report numbers in each exposure category, or summary measures of exposure                                                                                                         |                |
|                          |     | <i>Cross-sectional study</i> —Report numbers of outcome events or summary measures                                                                                                                           |                |
| Main results             | 16  | (a) Give unadjusted estimates and, if applicable, confounder-adjusted estimates and their precision (eg, 95% confidence interval). Make clear which confounders were adjusted for and why they were included | 11, 12, 13, 14 |
|                          |     | (b) Report category boundaries when continuous variables were categorized                                                                                                                                    |                |
|                          |     | (c) If relevant, consider translating estimates of relative risk into absolute risk for a meaningful time period                                                                                             |                |
| Other analyses           | 17  | Report other analyses done—eg analyses of subgroups and interactions, and sensitivity analyses                                                                                                               | NA             |
| <b>Discussion</b>        |     |                                                                                                                                                                                                              |                |
| Key results              | 18  | Summarise key results with reference to study objectives                                                                                                                                                     | 15, 16         |
| Limitations              | 19  | Discuss limitations of the study, taking into account sources of potential bias or imprecision. Discuss both direction and magnitude of any potential bias                                                   | 16,17          |
| Interpretation           | 20  | Give a cautious overall interpretation of results considering objectives, limitations, multiplicity of analyses, results from similar studies, and other relevant evidence                                   | 17             |
| Generalisability         | 21  | Discuss the generalisability (external validity) of the study results                                                                                                                                        | 17             |
| <b>Other information</b> |     |                                                                                                                                                                                                              |                |
| Funding                  | 22  | Give the source of funding and the role of the funders for the present study and, if applicable, for the original study on which the present article is based                                                | 17             |

\*Give information separately for cases and controls in case-control studies and, if applicable, for exposed and unexposed groups in cohort and cross-sectional studies.

**Note:** An Explanation and Elaboration article discusses each checklist item and gives methodological background and published examples of transparent reporting. The STROBE checklist is best used in conjunction with this article (freely available on the Web sites of PLoS Medicine at <http://www.plosmedicine.org/>, Annals of Internal Medicine at <http://www.annals.org/>, and Epidemiology at <http://www.epidem.com/>). Information on the STROBE Initiative is available at [www.strobe-statement.org](http://www.strobe-statement.org).

# BMJ Open

## Associations between intravaginal practices and incidence of sexually transmitted infections and bacterial vaginosis among women enrolled in the Dapivirine vaginal ring trial (The Ring Study) in southwestern Uganda, a retrospective secondary analysis

|                                 |                                                                                                                                                                                                                                                                                                                                                                                                                                                                                                                                                                                                                                                                                   |
|---------------------------------|-----------------------------------------------------------------------------------------------------------------------------------------------------------------------------------------------------------------------------------------------------------------------------------------------------------------------------------------------------------------------------------------------------------------------------------------------------------------------------------------------------------------------------------------------------------------------------------------------------------------------------------------------------------------------------------|
| Journal:                        | <i>BMJ Open</i>                                                                                                                                                                                                                                                                                                                                                                                                                                                                                                                                                                                                                                                                   |
| Manuscript ID                   | bmjopen-2023-079497.R3                                                                                                                                                                                                                                                                                                                                                                                                                                                                                                                                                                                                                                                            |
| Article Type:                   | Original research                                                                                                                                                                                                                                                                                                                                                                                                                                                                                                                                                                                                                                                                 |
| Date Submitted by the Author:   | 14-Mar-2024                                                                                                                                                                                                                                                                                                                                                                                                                                                                                                                                                                                                                                                                       |
| Complete List of Authors:       | Kusemererwa, Sylvia; MRC/UVRI and LSHTM Uganda Research Unit, Viral Pathogens Epidemiology and Interventions<br>Ruzagira, Eugene; MRC/UVRI and LSHTM Uganda Research Unit, Viral Pathogens Epidemiology and Interventions; London School of Hygiene & Tropical Medicine Faculty of Epidemiology and Population Health<br>Onyango, Martin; MRC/UVRI and LSHTM Uganda Research Unit, Viral Pathogens Epidemiology and Interventions<br>Kabarambi, Anita; International Centre for Child Health and Development<br>Abaasa, Andrew; MRC/UVRI and LSHTM Uganda Research Unit, Statistics & Data Science; London School of Hygiene & Tropical Medicine, Infectious Disease Epidemiology |
| <b>Primary Subject Heading</b>: | Public health                                                                                                                                                                                                                                                                                                                                                                                                                                                                                                                                                                                                                                                                     |
| Secondary Subject Heading:      | Sexual health                                                                                                                                                                                                                                                                                                                                                                                                                                                                                                                                                                                                                                                                     |
| Keywords:                       | Public health < INFECTIOUS DISEASES, Sexually Transmitted Disease, HIV & AIDS < INFECTIOUS DISEASES, Epidemiology < INFECTIOUS DISEASES                                                                                                                                                                                                                                                                                                                                                                                                                                                                                                                                           |
|                                 |                                                                                                                                                                                                                                                                                                                                                                                                                                                                                                                                                                                                                                                                                   |

SCHOLARONE™  
Manuscripts



I, the Submitting Author has the right to grant and does grant on behalf of all authors of the Work (as defined in the below author licence), an exclusive licence and/or a non-exclusive licence for contributions from authors who are: i) UK Crown employees; ii) where BMJ has agreed a CC-BY licence shall apply, and/or iii) in accordance with the terms applicable for US Federal Government officers or employees acting as part of their official duties; on a worldwide, perpetual, irrevocable, royalty-free basis to BMJ Publishing Group Ltd ("BMJ") its licensees and where the relevant Journal is co-owned by BMJ to the co-owners of the Journal, to publish the Work in this journal and any other BMJ products and to exploit all rights, as set out in our [licence](#).

The Submitting Author accepts and understands that any supply made under these terms is made by BMJ to the Submitting Author unless you are acting as an employee on behalf of your employer or a postgraduate student of an affiliated institution which is paying any applicable article publishing charge ("APC") for Open Access articles. Where the Submitting Author wishes to make the Work available on an Open Access basis (and intends to pay the relevant APC), the terms of reuse of such Open Access shall be governed by a Creative Commons licence – details of these licences and which [Creative Commons](#) licence will apply to this Work are set out in our licence referred to above.

Other than as permitted in any relevant BMJ Author's Self Archiving Policies, I confirm this Work has not been accepted for publication elsewhere, is not being considered for publication elsewhere and does not duplicate material already published. I confirm all authors consent to publication of this Work and authorise the granting of this licence.



1  
2  
3 **Associations between intravaginal practices and incidence of sexually transmitted**  
4 **infections and bacterial vaginosis among women enrolled in the Dapivirine vaginal ring**  
5 **trial (The Ring Study) in southwestern Uganda, a retrospective secondary analysis.**  
6  
7  
8  
9

10 **Authors:** Sylvia Kusemererwa<sup>1\*</sup>, Eugene Ruzagira<sup>1,3</sup>, Martin Onyango<sup>1</sup>, Anita Kabarambi<sup>4</sup>,  
11 Andrew Abasa<sup>2,3</sup>  
12  
13

14  
15  
16 **Institution**  
17

18 <sup>1</sup>Department of viral pathogen epidemiology and interventions, Medical Research Council/  
19 Uganda Virus Research Institute and London School of Hygiene and Tropical Medicine, Uganda  
20 Research Unit, Entebbe, Uganda  
21  
22

23  
24 <sup>2</sup>Department of statistics, Medical Research Council/ Uganda Virus Research Institute and  
25 London School of Hygiene and Tropical Medicine, Uganda Research Unit, Entebbe, Uganda  
26  
27

28 <sup>3</sup> Department of infectious diseases epidemiology, London School of Hygiene & Tropical  
29 Medicine, London, UK  
30  
31

32 <sup>4</sup>Department of research, International Center for Child Health and Development, Masaka,  
33 Uganda  
34  
35

36  
37  
38  
39  
40  
41  
42 Correspondence to: Sylvia Kusemererwa, <sup>1</sup>Medical Research Council/Uganda Virus Research  
43 Institute (MRC/UVRI) and London School of Hygiene and Tropical Medicine (LSHTM),  
44 Uganda Research Unit, Plot 51-59, Nakiwogo Road, P.O Box 49 Entebbe, Uganda. Phone: 256  
45 (0) 417 704000, or 256 (0) 70229100. [Sylvia.Kusemererwa@mrcuganda.org](mailto:Sylvia.Kusemererwa@mrcuganda.org) or  
46  
47 [kansykarus@gmail.com](mailto:kansykarus@gmail.com)  
48  
49  
50  
51  
52  
53  
54  
55  
56  
57  
58  
59  
60

1  
2  
3 **Associations between intravaginal practices and incidence of sexually transmitted**  
4 **infections and bacterial vaginosis among women enrolled in the Dapivirine vaginal ring**  
5 **trial (The Ring Study) in southwestern Uganda, a retrospective secondary analysis.**  
6  
7  
8  
9

10 **Abstract**

11 **Objectives:** We assessed associations between intravaginal practices (IVP) and the incidence of  
12 sexually transmitted infections (STIs) and bacterial vaginosis (BV) among women using the  
13 dapivirine vaginal ring (DVR) or placebo vaginal ring in southwestern Uganda.  
14  
15

16 **Methods:** This was a retrospective secondary analysis of data collected from women at risk of  
17 HIV infection recruited into The Ring Study. The latter evaluated the safety and efficacy of the  
18 DVR between 2013 and 2016. At baseline, a behavioral questionnaire was administered to obtain  
19 information on sexual activity and IVP (exposure) defined as; insertion inside the vagina of any  
20 items aimed at cleaning the vagina for any reason before, during or after sex other than practices  
21 to manage menses. Each participant self-inserted the DVR/placebo and replaced it every 4weeks  
22 for 2 years. Outcomes were diagnosis of STIs i.e., *Chlamydia trachomatis* (CT), *Neisseria*  
23 *gonorrhoea* (NG), *Trichomonas vaginalis* (TV), HIV and BV. The incidence rate of STI/BV was  
24 estimated, overall, by IVP and trial arm in single-event-per-participant and multiple-event-per-  
25 participant analyses.  
26  
27  
28  
29

30 **Results:** Of the 197 women enrolled, 66 (33.5%) were <25 years of age. Overall, 93 (47.2%)  
31 practiced at least one form of IVP. During follow up, 172 (87.3%) women were diagnosed with an  
32 STI/BV at least once. Majority had TV (73.6%, n=145). Overall rate of STI/BV was 51.9/100  
33 person-years, 95% confidence interval (CI): 44.7-60.3 [IVP: Yes, 51.0 (40.8-63.8) vs. No, 52.6  
34 (43.0-64.4)]. IVP were not statistically significantly associated with rate of individual STIs/BV.  
35 Similar results were observed when the analyses were conducted separately for each trial arm.  
36  
37  
38

39 **Conclusions:** IVP was not associated with risk of STIs/BV in The Ring Study.  
40  
41

42 **Key words:** Intravaginal practices, sexually transmitted infection, Bacterial vaginosis,  
43 Dapivirine, Vaginal Ring, Uganda  
44  
45  
46  
47  
48  
49  
50  
51  
52  
53  
54  
55  
56  
57  
58  
59  
60

### Study strengths and limitations

- The study was able to investigate multiple STIs and BV in the same population.
- The longitudinal nature of the study allowed for both single-event-per-participant and multiple-event-per-participant analyses.
- Extensive analysis was to some extent limited by a small sample size.
- Confirmatory tests were not done to confirm absence of an STI/BV prior to DVR insertion.

For peer review only

## INTRODUCTION

Sexually transmitted infections (STIs) remain a health challenge globally. In 2018, WHO estimated that nearly one million people become infected every day with a curable STI caused by: *Chlamydia trachomatis* (CT), *Neisseria gonorrhoea* (NG), Syphilis or *Trichomonas vaginalis* (TV).[1] STIs disproportionately affect low-and-middle-income countries, with 90% of the new infections occurring in these countries.[2] Women in sub-Saharan Africa have a high prevalence of STIs, particularly those at high risk of HIV infection also having a high STI burden.[3, 4] Bacterial vaginosis (BV), a common vaginal condition has also been associated with increased risk of STIs and HIV infection. [5] High rates (37% to 68%) of BV have been reported among women at high risk of HIV acquisition in Southern and East Africa. [6]

BV results from variation in normal vaginal flora attributed to reduction in the prevalence of Lactobacilli (dominant species in healthy vaginal environment) and an increase in the concentration of pathogenic organisms: *G. vaginalis*, *Bacteroides (Prevotella)* species, *Mobiluncus* species, and *Mycoplasma hominis*. [7, 8] Increasing evidence shows that vaginal microbiota may play a role in mediating susceptibility to STIs. Vaginal Lactobacilli utilize a number of actions to protect against colonization by genital pathogens. [9] This can be through: production of lactic acid that supports the maintenance of a lower vaginal pH, which may prevent pathogen growth, [10] exposure to hydrogen peroxide that has also been shown to decrease activity of BV and other genital tract organisms. [11, 12]

The high prevalence and increased risk of acquisition of STIs/BV and HIV has been associated with vaginal practices.[13] These practices include various behaviors used to maintain health, wellness, and enhance sexual pleasure.[14-16] The World Health Organization (WHO) has suggested seven classifications for vaginal practices: external washing, intravaginal cleansing, external application, intravaginal insertion, oral ingestion, vaginal streaming or smoking and anatomical modification.[17] On the other hand intravaginal practices (IVPs) refer to both intravaginal cleansing (cleaning or washing inside the vagina with fingers or substances like soap to remove fluids), and intravaginal insertion (placing something inside the vagina, like powders, creams, herbs, or tissue).[18, 19]

1  
2  
3 Soaps, detergents and antiseptics used to cleanse inside the vagina can cause chemical  
4 damage and increase vaginal pH resulting in overgrowth of BV related organisms, which has also  
5 been associated with increased risk of HIV acquisition.[19, 20] Other products have also been  
6 reported to cause genital lesions, and swellings, creating favorable conditions for the transmission  
7 of STIs, including HIV.[17] Items like cloth commonly used in some communities to clean the  
8 vagina repeatedly might also act as fomites, carrying TV organisms. [21] TV has also been  
9 associated with increased risk of HIV acquisition. [22, 23] These practices which increase a  
10 woman's susceptibility to HIV could reduce the effectiveness of vaginal microbicides. [24, 25]  
11  
12

13  
14  
15  
16  
17  
18 The monthly dapivirine vaginal ring (DVR) microbicide, a female controlled HIV  
19 prevention tool, was found to reduce the risk of HIV acquisition by approximately 30% in two  
20 phase 3 trials. [26, 27] With continued and consistent use, the risk of HIV acquisition was even  
21 lower (62%) in an open-label extension trial. [28] However, data are limited on the effect of  
22 intravaginal practices on vaginal flora and risk of STIs/BV among women using the DVR. We  
23 assessed associations between intravaginal practices and the incidence of STIs including HIV, and  
24 BV among women using the DVR or placebo vaginal ring in southwestern Uganda.  
25  
26  
27  
28  
29  
30

## 31 32 **METHODS**

### 33 34 **Study design**

35  
36  
37 This was a retrospective secondary analysis using data collected in The Ring Study, a phase 3  
38 microbicide trial. [26]  
39  
40

### 41 42 **Study setting and population**

43  
44 Details of the Ring Study (Registration number: NCT01539226) have been described elsewhere.  
45 [26] Briefly, The Ring Study was a multicenter microbicide trial, that evaluated the safety and  
46 efficacy of the DVR between 2013 and 2016 in Uganda and South Africa. The study was  
47 sponsored by the International Partnership for Microbicides. In Uganda, the study was conducted  
48 by the Medical Research Council (MRC)/Uganda Virus Research Institute (UVRI) and London  
49 School of Hygiene and Tropical Medicine (LSHTM) Uganda Research Unit in Masaka,  
50 southwestern Uganda. The site recruited women at high risk of HIV infection from towns along  
51 the trans-African highway and the shores of Lake Victoria. Details of the recruitment procedures  
52  
53  
54  
55  
56  
57

1  
2  
3 and study population have been described elsewhere. [29] Briefly, the research site enrolled 197  
4 women (18-45years of age) at high risk of HIV infection. Women were identified from sex work  
5 hotspots (bars, restaurants, hair salons, small shops, and other small-scale businesses). High risk  
6 was defined by presence of any two of the following: i) history of STIs in the past three months;  
7 ii) self-reported condom less sex with multiple sex partners or a new partner in the past three  
8 months; and iii) use of recreational drugs (marijuana, alcohol) in the past three months. Of the  
9 women enrolled, two in five were working in bars and restaurants and nearly a third had small  
10 scale businesses. A woman was included in the main study if they were not pregnant, not  
11 breastfeeding, asymptomatic for genital infections and tested HIV negative at the time of  
12 enrolment. Those diagnosed with any clinically significant curable STI, were initiated on treatment  
13 for at least a week prior and enrolled after completing a full course of treatment.  
14  
15  
16  
17  
18  
19  
20  
21  
22  
23  
24

### 25 **Study procedures**

26  
27 Participants consented for screening and enrolment on two separate occasions. At the first visit  
28 (screening), data on demographics, inclusion and exclusion criteria were obtained. A physical and  
29 genital examination was done. All potential participants were provided with HIV/STI risk-  
30 reduction counselling and HIV pre- and post-test counselling. At the second visit (enrolment),  
31 women who met all inclusion criteria and no exclusion criteria, had a normal pelvic examination,  
32 and negative HIV rapid tests were enrolled into the trial. Eligible women were randomised in a 2:1  
33 ratio to either the DVR arm or placebo arm. At the enrolment visit, an interviewer-administered  
34 behavioral questionnaire was used to obtain baseline information on sexual activity and vaginal  
35 practices. At 4 weeks post-enrolment and every 24 weeks thereafter for the next 2 years, follow-  
36 up data on vaginal practices were collected using an interviewer-administered behavioral  
37 questionnaire. The latter included questions to which participants replied by selecting from a  
38 variety of pre-specified responses and provided open-ended responses about their IVP. Participants  
39 self-inserted a vaginal ring every 4 weeks for up to 104 weeks.  
40  
41  
42  
43  
44  
45  
46  
47  
48  
49  
50  
51

52 **Measurement of exposure [intravaginal practices (IVP)]:** IVP was defined as insertion inside  
53 the vagina of any items aimed at cleaning the vagina for any reason before, during or after sex  
54 other than practices to manage menses. Items included: materials such as paper, cloth, or cotton  
55  
56  
57  
58  
59  
60

1  
2  
3 wool; water only; water and soap; fingers to clean or insert something. Women were asked if they  
4 were inserting or using any of the aforementioned items inside the vagina to clean their vagina  
5 either as a general cleaning/hygiene practice before or after sex or to prepare the vagina for sex in  
6 the past, at baseline and every 24 weeks.  
7  
8  
9

10  
11  
12 **Measurement of outcome (diagnosis of STIs/BV):** Cervico-vaginal swabs were collected at the  
13 first screening visit and every 12 weeks (3 months) for 2 years. The swabs were tested for TV  
14 (OSOM® Trichomonas Rapid test- Sekisui Diagnostics, LLC, USA) and CT/NG (Cobas®  
15 Amplicor CT/NG -PCR test, Roche Diagnostic Systems, Branchburg, New Jersey). Vaginal fluid  
16 samples were also collected by trained clinicians using sterile swabs for assessment of vaginal  
17 flora (using Nugent's score) and vaginal fluid pH at the enrolment visit (prior to ring insertion)  
18 and every 12 weeks. Samples with a score of  $\geq 7$  were classified as BV present. Each slide was  
19 scored by trained laboratory technologists. For internal quality control, a single batch of slides  
20 were re-examined by an independent reader weekly. Discrepant results were resolved by expert  
21 consensus. External quality control was assured using College of American Pathologists Vaginitis  
22 screen, vaginal gram stain-VS2 as part of the site standard operating procedures.  
23  
24  
25  
26  
27  
28  
29  
30  
31

32 Participants were tested for HIV at the screening and enrolment visit using whole blood  
33 samples collected by venipuncture. Serial rapid HIV antibody tests were done using Alere  
34 Determine™ HIV-1/2 (Alere, Medical co., Ltd, Matsuhidai, Matsudo-shi, Chiba, Japan) followed  
35 by OraQuick- ADVANCE® Rapid HIV-1/2 Test (OraQuick-OraSure Technologies Inc,  
36 Pennsylvania) to confirm a positive Determine result and Uni- Gold™ HIV (Trinity Biotech,  
37 Ireland) as the tie breaker. At the screening/enrolment visits, a participant was confirmed to have  
38 HIV infection if they tested positive on at least two rapid HIV antibody tests. Post-enrolment, HIV  
39 testing was done serially as described above. However, for participants who tested positive or  
40 discordant on two rapid HIV antibody tests, a confirmatory test on stored plasma was done using  
41 Western Blot (J. Mitra and Co.Pvt. ltd, India) as previously described. Blood samples were  
42 collected and plasma stored every 4 weeks. Stored plasma samples for participants with confirmed  
43 HIV infection were retrospectively tested at a central laboratory in South Africa (Bioanalytical  
44 Research Corporation) for HIV ribonucleic acid (RNA) copies (viral load) using the polymerase-  
45 chain-reaction (PCR) assay. [26]  
46  
47  
48  
49  
50  
51  
52  
53  
54  
55  
56  
57  
58  
59  
60

## Statistical analysis

Data analyses were performed in Stata version 15.0 (Stata Corp, College Station, TX, USA). Participants' baseline characteristics were summarized using frequencies and percentages overall and by IVP status and compared between IVP users and none users using a chi-squared test. We determined the proportion of participants that were positive for a given STI/BV (event) as the number who tested positive for an STI/BV at least once during the study divided by the total number tested. We determined associations between IVP and incidence of each STI/BV, by estimating the rate of STI/BV overall and stratified by IVP status. We used two approaches for measuring the rate of STI/BV; (a) a single-event-per-participant (allowing for one event per participant-first STI/BV event) and (b) a multiple-event-per-participant (allowing for two or more STI/BV events for the same participant) since these are recurrent events. The incidence rate of a given STI/BV was estimated as the number of participants who tested positive for STI/BV divided by the person-time (years) at risk (pyr) expressed as per 100 pyr. PYR were estimated as a sum of the time from enrolment into the trial (those negative at baseline) to the date of trial completion or censoring (trial end, end of ring use and their first event for a given outcome). Participants that tested positive for STI/BV at baseline were given treatment and started to contribute person-time after completing the course of treatment. Similar approach was followed for those that got infected during follow up though the person time was segmented to allow for multiple entry and exit from the analysis following treatment. We further adjusted the effect of IVP on rate of STI/BV for age and baseline STI/BV status by fitting Poisson regression models. In the analysis, we used Poisson regression model with time-varying covariates, allowing for intergroup correlation (because women had multiple records) by using cluster robust standard errors. For HIV, we estimated the rate of HIV infection as number of HIV positive cases divided by the total person years at risk expressed as per 100 person years at risk in a single-event-per-participant survival analysis. Person time at risk were calculated as sum of the time from enrolment to the last HIV seronegative date (for those that remained negative throughout the trial) or to the estimated date of HIV infection. The HIV infection date was estimated as a multiple imputation random date between the last HIV seronegative and the first HIV+ result date.



## Compliance with Ethical Standards

Approval was obtained from the Uganda Virus Research Institute Research Ethics Committee (Ref#-GC/127/13/03/33), the Uganda National Council of Science and Technology (Ref#-HS1362) and the National Drug Authority (Ref#-166/ESR/NDA/DID-07/2013). Written informed consent was obtained from each woman before any study procedures were performed. Women who tested HIV-positive were referred to an HIV care provider of their choice. Treatment was provided to those who tested positive for STIs/BV according to the Centers for Disease Control and Prevention (CDC) STD Treatment guidelines 2010. [30]

## Patient and Public Involvement Statement

Communities where the study was conducted were involved from the inception of the study. Community gate keepers: Local Council leaders, political leaders, village health teams, community based and faith based organizations were informed of the study via various engagement meetings prior to study start. The site Community Advisory Board (CAB) members were engaged to review study documents, consent and other study literacy documents and confirm translations to the local language. The CAB was compensated for all the activities they were involved in. Volunteer recruitment and retention was supported by local leaders. Results were disseminated to study participants, CAB and community members through community meetings upon study completion and presentations at national and international meetings, seminars and conferences. All stakeholders were compensated for the time spent during engagement meetings.

## RESULTS

### Baseline socio-demographic characteristics

In total, 197 women enrolled, 67% on the DVR trial arm. Of those, 66 (33.5%) were less than 25 years of age, 82 (41.6%) were married and very few 24 (12.2%) had secondary school education. Majority, 162 (82.2%) reported having a main partner but only 75 (46.3%) lived with this partner (Table 1). About a half, 100 (50.8%) tested positive for an STI/ BV at baseline. Compared with

those who had one episode of STI/BV, participants with two or more episodes were likely to be single and never married (47.8% vs. 35.6%), not currently living with a main partner (56.5% vs. 37.5%,  $p=0.033$ ) and inconsistently living with the main partner in the past year (69.6% vs. 41.7%;  $p=0.001$ ) but otherwise similar in regard to other participant characteristics.

**Table 1: Baseline socio-demographic characteristics of 197 women enrolled in The Ring Study in southwestern Uganda between 2013 and 2016**

| Variable                                   | All<br>n (%) | Intravaginal practices |              | p-value      |
|--------------------------------------------|--------------|------------------------|--------------|--------------|
|                                            |              | No<br>n (%)            | Yes<br>n (%) |              |
| Overall                                    | 197          | 104 (52.8)             | 93 (47.2)    |              |
| Trial arm                                  |              |                        |              | 0.835        |
| Dapivirine vaginal ring                    | 132 (67.0)   | 69 (66.4)              | 63 (67.7)    |              |
| Placebo                                    | 65 (33.0)    | 35 (33.6)              | 30 (32.3)    |              |
| Age (years)                                |              |                        |              | 0.275        |
| 18-24                                      | 66 (33.5)    | 30 (28.8)              | 36 (38.7)    |              |
| 25-34                                      | 98 (49.8)    | 57 (54.8)              | 41 (44.1)    |              |
| 35+                                        | 33 (16.7)    | 17 (16.4)              | 16 (17.2)    |              |
| Education level                            |              |                        |              | 0.276        |
| Incomplete primary school                  | 68 (34.5)    | 37 (35.6)              | 31 (33.3)    |              |
| Complete primary school                    | 105 (53.3)   | 58 (55.8)              | 47 (50.5)    |              |
| Secondary school*                          | 24 (12.2)    | 9 (8.6)                | 15 (16.1)    |              |
| Marital status                             |              |                        |              | <b>0.020</b> |
| Single and never married                   | 90 (45.7)    | 38 (36.5)              | 52 (55.9)    |              |
| Single but previously married              | 25 (12.7)    | 14 (13.5)              | 11 (11.8)    |              |
| Married                                    | 82 (41.6)    | 52 (50.0)              | 30 (32.3)    |              |
| Number of life time sex partners           |              |                        |              | <b>0.002</b> |
| Median (IQR)                               | 6 (4-12)     | 5 (3-9)                | 8 (5-20)     |              |
| Has main partner                           |              |                        |              | 0.194        |
| No                                         | 35 (17.8)    | 15 (14.4)              | 20 (21.5)    |              |
| Yes                                        | 162 (82.2)   | 89 (85.6)              | 73 (78.5)    |              |
| Duration lived with main partner (years)   |              |                        |              | 0.690        |
| <1                                         | 35 (21.6)    | 17 (19.1)              | 18 (24.7)    |              |
| 1-2                                        | 34 (21.0)    | 19 (21.3)              | 15 (20.5)    |              |
| 3+                                         | 93 (57.4)    | 53 (59.6)              | 40 (54.8)    |              |
| Lived with (main) partner in the past year |              |                        |              | 0.171        |
| All the time                               | 48 (37.8)    | 38 (42.7)              | 24 (32.9)    |              |
| Some of the time                           | 14 (11.0)    | 7 (7.9)                | 12 (16.4)    |              |
| No                                         | 65 (51.2)    | 44 (49.4)              | 37 (50.7)    |              |
| Currently lives with main partner          |              |                        |              | 0.376        |
| No                                         | 87 (53.7)    | 45 (50.6)              | 42 (57.5)    |              |
| Yes                                        | 75 (46.3)    | 44 (49.4)              | 31 (42.5)    |              |

|                                                                |            |            |           |              |
|----------------------------------------------------------------|------------|------------|-----------|--------------|
| Unprotected sex with multiple/new partner in the past 3 months |            |            |           |              |
| No                                                             | 38 (19.3)  | 18 (17.3)  | 20 (21.5) | 0.456        |
| Yes                                                            | 159 (80.7) | 86 (82.7)  | 73 (78.5) |              |
| Drug/alcohol use in the past 3 months                          |            |            |           |              |
| No                                                             | 48 (24.4)  | 32 (30.8)  | 16 (17.2) | <b>0.027</b> |
| Yes                                                            | 149 (75.6) | 72 (69.2)  | 77 (82.8) |              |
| Baseline STI/BV status                                         |            |            |           |              |
| TV                                                             |            |            |           |              |
| Negative                                                       | 121 (61.4) | 61 (58.7)  | 60 (64.5) | 0.399        |
| Positive                                                       | 76 (38.6)  | 43 (41.3)  | 33 (35.5) |              |
| NG                                                             |            |            |           |              |
| Negative                                                       | 173 (87.8) | 92 (88.5)  | 81 (87.1) | 0.770        |
| Positive                                                       | 24 (12.2)  | 12 (11.5)  | 12 (12.9) |              |
| CT                                                             |            |            |           |              |
| Negative                                                       | 177 (89.8) | 97 (93.3)  | 80 (86.0) | 0.093        |
| Positive                                                       | 20 (10.2)  | 7 (6.7)    | 13 (14.0) |              |
| BV                                                             |            |            |           |              |
| Negative                                                       | 191 (96.9) | 102 (53.4) | 89 (46.6) | 0.332        |
| Positive                                                       | 6 (3.1)    | 2 (33.3)   | 4 (66.7)  |              |

n=Number; \*Includes one woman who had greater than secondary education, TV- *Trichomonas vaginalis*, NG-*Neisseria gonorrhoea*, CT-*Chlamydia trachomatis*, BV-Bacterial vaginosis

### Proportion of women reporting intravaginal practices (IVP)

Ninety-three (47.2%) women reported at least one form of IVP. The commonly used substances to clean the vagina included: soap (n=76, 81.7%), cloth (n=5, 5.4%), and others (honey, herbs, perfume n=12, 12.9%). Reported IVP were more common among single and never married women compared to single but previously married or currently married women (p=0.020), among those with more sex partners (p=0.002) and those who used drugs/alcohol in the past 3 months (p= 0.027) (Table 1).

### Proportion and rate of STIs/BV

A total of 172 (87.3%) women were diagnosed with an STI/BV at least once during follow up, with an overall single-event-per participant incidence rate of 51.9 per 100 pyrs. The overall incidence rate for HIV was 5.8 per 100 pyrs. The most common STI was TV (73.6%, n=145/197 diagnosed at least once) with a rate of 92.7 per 100 pyrs in the single-event-per-participant analysis (Table 2).

### Associations between IVP and rate of STIs/BV

In the single-event-per-participant analysis, STI/BV and HIV rates were not associated with reported IVP (Table 2). However, in the multiple-events-per participant analysis, the rate of CT was statistically significantly lower among women who reported IVP versus those who did not ( $p=0.030$ ). On stratification by trial arm, the rate of NG was higher in the DVR arm compared to the placebo arm in both the single and multiple-events-per participant analysis among women not using IVP ( $p=0.024$  and  $p=0.007$  respectively) (Table 3). After adjusting for participant baseline characteristics, overall, in the multiple-event per participant analyses, IVP was only associated with lower rates of CT among women in the placebo arm [adjusted rate ratio (aRR)=0.33, 95% CI 0.14-0.78] (Table 3).

**Table 2: Associations between intravaginal practices and rate of sexually transmitted infection/Bacterial vaginosis among women in the Ring Study in southwestern Uganda**

| Sexually transmitted infection/condition | Single-event-per-participant analysis |                              |                             |          |                  |                  |
|------------------------------------------|---------------------------------------|------------------------------|-----------------------------|----------|------------------|------------------|
|                                          | Overall<br>Rate/100 PYR (95% CI)      | Intravaginal practices       |                             | p-value* | uRR (95% CI)     | aRR (95% CI)     |
|                                          |                                       | Yes<br>Rate/100 PYR (95% CI) | No<br>Rate/100 PYR (95% CI) |          |                  |                  |
| HIV                                      | 5.8 (3.0-11.1)                        | 7.0 (2.9-17.0)               | 4.7 (1.8-12.4)              | 0.278    | 1.51 (0.39-5.81) | 1.29 (0.29-5.67) |
| <i>Trichomonas vaginalis</i>             | 92.7 (78.7-109.0)                     | 97.4 (76.9-123.3)            | 88.7 (70.9-111.1)           | 0.288    | 1.10 (0.79-1.52) | 1.10 (0.67-1.63) |
| <i>Neisseria gonorrhoea</i>              | 23.4 (18.3-29.9)                      | 22.8 (15.9-32.9)             | 23.8 (17.0-33.4)            | 0.435    | 0.96 (0.58-1.57) | 0.99 (0.56-1.79) |
| <i>Chlamydia trachomatis</i>             | 28.4 (22.7-35.6)                      | 27.9 (20.2-38.8)             | 28.9 (21.2-39.4)            | 0.446    | 0.97 (0.62-1.52) | 0.83 (0.50-1.38) |
| Bacterial vaginosis                      | 14.1 (10.6-18.6)                      | 13.4 (8.9-20.4)              | 14.7 (10.1-21.4)            | 0.383    | 0.92 (0.52-1.61) | 1.13 (0.53-2.37) |
| Multiple-events-per-participant analysis |                                       |                              |                             |          |                  |                  |
| <i>Trichomonas vaginalis</i>             | 88.9 (79.6-99.5)                      | 90.2 (76.8-106.0)            | 87.9 (75.3-102.5)           | 0.406    | 1.03 (0.77-1.37) | 1.07 (0.80-1.43) |
| <i>Neisseria gonorrhoea</i>              | 28.4 (23.3-34.6)                      | 28.7 (21.5-38.1)             | 28.2 (21.5-37.0)            | 0.935    | 1.02 (0.61-1.69) | 0.99 (0.59-1.67) |
| <i>Chlamydia trachomatis</i>             | 43.6 (37.2-51.1)                      | 36.6 (28.4-47.1)             | 49.9 (40.7-61.2)            | 0.030    | 0.73 (0.45-1.20) | 0.64 (0.38-1.05) |
| Bacterial vaginosis                      | 18.8 (11.1-31.7)                      | 12.1 (4.5-32.2)              | 24.1 (13.0-44.8)            | 0.124    | 0.51 (0.13-1.95) | 0.48 (0.16-1.47) |

PYR = person-years at risk; CI = Confidence interval; aRR = adjusted rate ratio; ¶Adjusted for age, trial arm, STI/BV at baseline, \* Unadjusted p-value comparing the rate of each STI between IVP use and none use

**Table 3: Associations between intravaginal practices and rate of sexually transmitted infection/Bacterial vaginosis stratified by trial arm among women in the Ring Study in southwestern Uganda**

| Single-event-per-participant analysis    |         |                       |                       |          |                    |                        |
|------------------------------------------|---------|-----------------------|-----------------------|----------|--------------------|------------------------|
| Sexually transmitted infection/condition | Overall | Trial arm             |                       | p-value* | aRR (DVR) (95% CI) | aRR (Placebo) (95% CI) |
|                                          | IVP use | DVR                   | Placebo               |          |                    |                        |
|                                          |         | Rate/100 PYR (95% CI) | Rate/100 PYR (95% CI) |          |                    |                        |
| HIV                                      | No      | 3.3 (0.8-12.9)        | 8.4 (2.1-33.8)        | 0.374    | -                  | -                      |
|                                          | Yes     | 8.8 (3.3-23.5)        | 3.9 (0.6-27.9)        | 0.518    | -                  | -                      |
| <i>Trichomonas vaginalis</i>             | No      | 77.5 (58.4-102.8)     | 118.3 (81.6-171.3)    | 0.081    | 1                  | 1                      |
|                                          | Yes     | 105.8 (79.7-140.4)    | 82.4 (53.7-126.4)     | 0.171    | 1.34 (0.78-2.31)   | 0.59 (0.28-1.26)       |
| <i>Neisseria gonorrhoea</i>              | No      | 30.5 (21.1- 44.2)     | 11.8 (5.3-26.2)       | 0.024    | 1                  | 1                      |
|                                          | Yes     | 20.6 (13.0-32.6)      | 28.0 (15.5-50.5)      | 0.211    | 0.73 (0.35-1.53)   | 1.88 (0.49-7.20)       |
| <i>Chlamydia trachomatis</i>             | No      | 28.5 (19.4-41.9)      | 29.5 (17.5-49.8)      | 0.911    | 1                  | 1                      |
|                                          | Yes     | 29.7 (20.2-43.6)      | 24.3 (13.1-45.2)      | 0.305    | 1.09 (0.60-2.00)   | 0.37 (0.11-1.36)       |
| Bacterial vaginosis                      | No      | 13.7 (8.6-22.1)       | 16.5 (8.9-30.7)       | 0.636    | 1                  | 1                      |
|                                          | Yes     | 12.6 (7.5-21.3)       | 15.2 (7.6-30.3)       | 0.332    | 0.74 (0.26-2.09)   | 1.51 (0.35-6.52)       |
| Multiple-events-per-participant analysis |         |                       |                       |          |                    |                        |
| <i>Trichomonas vaginalis</i>             | No      | 87.2 (72.2-105.3)     | 89.2 (68.3-116.5)     | 0.558    | 1                  | 1                      |
|                                          | Yes     | 94.4 (77.9-114.2)     | 81.5 (60.5-109.9)     | 0.213    | 1.12 (0.80-1.56)   | 0.76 (0.44-1.30)       |
| <i>Neisseria gonorrhoea</i>              | No      | 34.7 (25.8-46.8)      | 14.9 (7.7-28.6)       | 0.007    | 1                  | 1                      |
|                                          | Yes     | 25.2 (17.4-36.4)      | 36.0 (23.0-56.5)      | 0.116    | 0.74 (0.42-1.30)   | 2.24 (0.61-8.31)       |
| <i>Chlamydia trachomatis</i>             | No      | 56.5 (44.7-71.5)      | 36.3 (24.0-55.2)      | 0.065    | 1                  | 1                      |
|                                          | Yes     | 40.4 (30.2-54.2)      | 28.4 (17.1-47.2)      | 0.126    | 0.75 (0.43-1.29)   | 0.33 (0.14-0.78)       |
| Bacterial vaginosis                      | No      | 20.5 (9.2-45.7)       | 32.7 (12.3-87.0)      | 0.482    | 1                  | 1                      |
|                                          | Yes     | 12.5 (4.0-38.7)       | 11.1 (1.6-78.7)       | 0.491    | 0.64 (0.11-3.71)   | 0.39 (0.10-2.72)       |

PYR = person-years at risk; CI = Confidence interval; uRR = unadjusted rate ratio; aRR = adjusted rate ratio; †Adjusted for age, and STI/BV at baseline, \* compares rates for IVP (yes or no) between DVR and placebo

## DISCUSSION

Our study aimed to assess associations between IVP and incidence of STIs including HIV, and BV among women using the DVR or placebo. Overall, we found that nearly one in every two women practiced at least one form of IVP. IVP is reported to be high in African women with proportions of between 30-50%, and even higher among women at high risk of acquiring HIV.[31, 32] Generally, IVP in this population is driven by cultural and social norms as well as the need for personal hygiene in relation to sexual health and relationships.[33] Women recruited in our study were those engaging in transactional sex and are thus expected to present themselves to their male partners in a fresh vaginal state.[34, 35] The frequency of IVP amongst women involved in transactional sex may be influenced by the need to remain clean/fresh coupled with worries about HIV infection. Prior studies in Uganda and Tanzania showed that a higher frequency of sex was associated with more frequent engagement with IVP. [25, 36, 37]

The prevalence of STIs/BV in our study population was high confirming the fact that the women were at very high risk of HIV infection. More events were reported among single women and those who did not live with a main partner and those with more sex partners. Women at high risk of HIV infection engage in transactional sex and have multiple partners, that puts them at higher risk of acquiring STIs/BV. Those who were single also engaged more in IVP. Earlier studies showed that women engaging in high frequency of sex require to present themselves as clean to their male partners. [14, 34] IVP is generally practiced for hygiene purposes and sexuality. [15, 16] IVP has been associated with changes in vaginal flora and resulting BV. The latter is associated with increased susceptibility to STIs including HIV. [17] The interaction between BV and STIs including HIV has been well documented with each causing genital inflammation. [38] It is reported that organisms associated with BV may overgrow as a result of increased vaginal pH brought about by substances that may be used for IVP like soaps which most of the women in our study used. With increased pH, the protective Lactobacilli species are replaced by pathogenic organisms resulting in BV. [19, 20] The products used may cause genital lesions enabling the transmission of STIs. [17]

We observed a high incidence of STIs in this population, with the commonest STI being TV. TV is reported to be prevalent among women engaging in transactional sex with high proportions reported globally (16%) and the African region contributing even higher proportions (23%).[39] TV has also been associated with BV especially among women that use cloth for IVP as these act as fomites.[21]

1  
2  
3 Although the incidence of STIs was high, we did not see any significant difference in the rise in incidence  
4 of STIs/BV among women using IVP compared to those who did not, except for CT that was lower. It is  
5 not clear and has not been documented that IVP reduces the risk of acquiring STIs/BV, though the reverse  
6 has been reported. IVP causes changes to vaginal flora resulting in increased risk of STIs/BV including  
7 HIV. A recent systematic review found that IVP increased the risk of vaginal infections (BV, TV, and  
8 vulvovaginal candidiasis),[40] two others found no association between IVP and TV[15] or BV.[41]  
9 One study in South Africa found that IVP was associated with increased risk of HIV infection but not  
10 other STIs.[42] The fact that IVP results in BV, organisms related with BV have been associated with  
11 the production of metabolites that are used by STIs like CT as growth factors enabling their  
12 multiplication.[43] Incidence of CT has been reported to be high among women (5 per 100pyrs),  
13 especially among younger women (27.6 per 100 pyrs) in Kenya, but not associated with vaginal  
14 washing.[44]

15  
16 We also found that women not using IVP, but using the DVR had higher rates of NG  
17 compared to those in the placebo arm. Women in this study generally had high rates of STIs. We have  
18 previously reported that rates of STIs decreased over time in the same cohort of women. [45] Apart from  
19 lower rates of CT among women using the placebo vaginal ring, there was no statistically significant  
20 association between the DVR microbicide and STI/BV including HIV rates among those using IVP. The  
21 DVR has been associated with minimal changes in the vaginal microbiota that were likely not clinically  
22 significant.[46] It has generally been found to be well tolerated in adult as well as adolescent girls and  
23 young women.[47, 48] Various studies on microbicides have reported that their use may result in little  
24 or no difference in the risk of acquiring STIs like CT, NG or TV.[49] In the Buffer Gel microbicide study  
25 for example, no significant changes in colonization with *Lactobacillus* species was reported.[50]

26  
27 The strengths of this study included the opportunity to investigate multiple STIs and BV in the  
28 same population and the ability to collect recurrent data on genital conditions which allowed for conduct  
29 of both single-event-per-participant and multiple-event-per-participant analyses. The multiple-event-per-  
30 participant analysis models the total rate of events over the entire follow-up period and has more power  
31 for detecting associations compared to the single-event-per-participant analysis. [51] This analysis is also  
32 more clinically relevant because STI re-infection and BV recurrence are common.

33  
34 A limitation of the study was the small sample size which may have impacted the study power  
35 and consequently the ability to detect any differences in STI/BV rates between women who reported IVP



1  
2  
3 and those who did not. Additionally, no confirmatory tests were done to confirm absence of an STI/BV  
4 prior to DVR insertion. However, duration of treatment and absence of symptoms and signs were used  
5 as a proxy for lack of an STI/BV. Furthermore, it was not possible to measure and evaluate any versus  
6 no IVP. This is challenging to do as different types of IVP and materials used affect the risk of HIV, STI  
7 and BV risk. This has also not been possible to measure in previous studies.  
8  
9  
10  
11

12 In conclusion, we found a high prevalence of IVP and incidence of STIs/BV among women  
13 enrolled in the Ring Study in Uganda. IVP did not statistically significantly increase STI/BV rates.  
14 Implying that women who practice intravaginal cleansing/insertion could continue using these practices  
15 in the presence of the microbicide. However, our results should be interpreted with caution because of a  
16 limitation in sample size that could generate a hypothesis and not conclusively test it. An analysis with  
17 a bigger sample size could be helpful to better understand whether there is a link between use of the  
18 DVR, IVP, and incidence of STIs/BV.  
19  
20  
21  
22  
23  
24  
25  
26

## 27 **Acknowledgements**

28  
29 International Partnership for Microbicides' (a not-for-profit product-development partnership) work is  
30 made possible by generous support from many donors including: the Bill and Melinda Gates  
31 Foundation, Irish Aid, the Ministry of Foreign Affairs of Denmark, the Ministry of Foreign Affairs of  
32 the Netherlands, the Norwegian Agency for Development Cooperation, the U.K. Department for  
33 International Development, the American people through the U.S. Agency for International  
34 Development, and the President's Emergency Plan for AIDS Relief. We thank the study team who  
35 worked tirelessly in planning, recruitment and data collection for this study.  
36  
37  
38  
39  
40  
41  
42

43 **Competing interests:** All authors declare that they have no conflict of interest.  
44  
45

46 **Funding:** This work was supported by the International Partnership for Microbicides  
47 ([www.ipmglobal.org](http://www.ipmglobal.org)), grant number (IND # 110,659).  
48  
49  
50

## 51 **Author Contributions:**

52 SK, AA, ER designed the study and wrote the initial manuscript draft, and AA did the data analysis.  
53 KA and MO conducted the study while SK directed the work. KA and MO contributed to the writing  
54  
55  
56  
57  
58  
59  
60

1  
2  
3 and editing of the manuscript. All authors contributed to the interpretation of the results and critically  
4 commented and provided revisions to the manuscript. All authors approved the final version of the  
5 manuscript. The corresponding author attests that all listed authors meet authorship criteria and that no  
6 others meeting the criteria have been omitted.  
7  
8  
9

10  
11  
12 **Data availability statement:** Data are available on reasonable request.  
13  
14  
15  
16  
17  
18  
19  
20  
21  
22  
23  
24  
25  
26  
27  
28  
29  
30  
31  
32  
33  
34  
35  
36  
37  
38  
39  
40  
41  
42  
43  
44  
45  
46  
47  
48  
49  
50  
51  
52  
53  
54  
55  
56  
57  
58  
59  
60

For peer review only

## References

1. World Health Organization. Report on global sexually transmitted infection surveillance 2018. 2018. Report No.: 9241565691.
2. Unemo M, Bradshaw CS, Hocking JS, de Vries HJC, Francis SC, Mabey D, et al. Sexually transmitted infections: challenges ahead. *The Lancet Infectious Diseases*. 2017;17(8):e235-e79.
3. Torrone EA, Morrison CS, Chen P-L, Kwok C, Francis SC, Hayes RJ, et al. Prevalence of sexually transmitted infections and bacterial vaginosis among women in sub-Saharan Africa: an individual participant data meta-analysis of 18 HIV prevention studies. *PLoS medicine*. 2018;15(2):e1002511.
4. Awungafac G, Delvaux T, Vuylsteke B. Systematic review of sex work interventions in sub-Saharan Africa: examining combination prevention approaches. *Tropical Medicine & International Health*. 2017;22(8):971-93.
5. Bayigga L, Kateete DP, Anderson DJ, Sekikubo M, Nakanjako D. Diversity of vaginal microbiota in sub-Saharan Africa and its effects on HIV transmission and prevention. *American journal of obstetrics and gynecology*. 2019;220(2):155-66.
6. Bautista CT, Wurapa E, Sateren WB, Morris S, Hollingsworth B, Sanchez JL. Bacterial vaginosis: a synthesis of the literature on etiology, prevalence, risk factors, and relationship with chlamydia and gonorrhea infections. *Military Medical Research*. 2016;3:4.
7. Wang J. Bacterial vaginosis. Primary care update for OB/GYNS. 2000;7(5):181-5.
8. Rao D, Pindi D, Rani D, Sasikala D, Kawle D. Diagnosis of bacterial vaginosis: Amsel's Criteria vs Nugent's scoring. *Sch J Appl Med Sci*. 2016;4(6):2027-31.
9. Spurbeck RR, Arvidson CG. Lactobacilli at the front line of defense against vaginally acquired infections. *Future microbiology*. 2011;6(5):567-82.
10. Boskey E, Telsch K, Whaley K, Moench T, Cone R. Acid production by vaginal flora in vitro is consistent with the rate and extent of vaginal acidification. *Infection and immunity*. 1999;67(10):5170-5.
11. Atassi F, Brassart D, Grob P, Graf F, Servin AL. Lactobacillus strains isolated from the vaginal microbiota of healthy women inhibit *Prevotella bivia* and *Gardnerella vaginalis* in coculture and cell culture. *FEMS Immunology & Medical Microbiology*. 2006;48(3):424-32.
12. Saigh JH, Sanders CC, Sanders Jr WE. Inhibition of *Neisseria gonorrhoeae* by aerobic and facultatively anaerobic components of the endocervical flora: evidence for a protective effect against infection. *Infection and immunity*. 1978;19(2):704-10.
13. Van De Wijgert J, Mason PR, Gwanzura L, Mbizvo MT, Chirenje Z, Iliff V, et al. Intravaginal practices, vaginal flora disturbances, and acquisition of sexually transmitted diseases in Zimbabwean women. *The Journal of infectious diseases*. 2000;181(2):587-94.
14. Martin Hilber A. Women's health, hygiene and HIV in Sub-Saharan Africa: The role of vaginal practices: Ghent University; 2012.
15. Hilber AM, Francis SC, Chersich M, Scott P, Redmond S, Bender N, et al. Intravaginal practices, vaginal infections and HIV acquisition: systematic review and meta-analysis. *PloS one*. 2010;5(2):e9119.
16. Woodsong C, Alleman P. Sexual pleasure, gender power and microbicide acceptability in Zimbabwe and Malawi. *AIDS Education and Prevention*. 2008;20(2):171.
17. World Health Organization. A multi-country study on gender, sexuality and vaginal practices: Implications for sexual health 2012 [Available from: <https://www.jstor.org/stable/resrep28254>].
18. Alcaide ML, Rodriguez VJ, Fischl MA, Jones DL, Weiss SM. Addressing intravaginal practices in women with HIV and at-risk for HIV infection, a mixed methods pilot study. *International journal of women's health*. 2017;9:123-32.

19. Low N, Chersich MF, Schmidlin K, Egger M, Francis SC, van de Wijgert JH, et al. Intravaginal practices, bacterial vaginosis, and HIV infection in women: individual participant data meta-analysis. *PLoS medicine*. 2011;8(2):e1000416.
20. van de Wijgert JH. The vaginal microbiome and sexually transmitted infections are interlinked: consequences for treatment and prevention. *PLoS medicine*. 2017;14(12):e1002478.
21. Eshete A, Mekonnen Z, Zeynudin A. *Trichomonas vaginalis* infection among pregnant women in Jimma university specialized hospital, southwest Ethiopia. *International Scholarly Research Notices*. 2013;2013.
22. Van Der Pol B, Kwok C, Pierre-Louis B, Rinaldi A, Salata RA, Chen P-L, et al. *Trichomonas vaginalis* infection and human immunodeficiency virus acquisition in African women. *The Journal of infectious diseases*. 2008;197(4):548-54.
23. McClelland RS, Sangaré L, Hassan WM, Lavreys L, Mandaliya K, Kiarie J, et al. Infection with *Trichomonas vaginalis* increases the risk of HIV-1 acquisition. *The Journal of infectious diseases*. 2007;195(5):698-702.
24. Chersich M, Hilber AM, Schmidlin K, Egger M, Francis S, Baeten J, et al. Association between intravaginal practices and HIV acquisition in women: individual patient data meta-analysis of cohort studies in sub-Saharan Africa. 5th IAS Conference on HIV Pathogenesis, Treatment and Prevention 2009.
25. Francis SC, Baisley K, Lees SS, Andrew B, Zalwango F, Seeley J, et al. Vaginal practices among women at high risk of HIV infection in Uganda and Tanzania: recorded behaviour from a daily pictorial diary. *PloS one*. 2013;8(3):e59085.
26. Nel A, van Niekerk N, Kapiga S, Bekker LG, Gama C, Gill K, et al. Safety and Efficacy of a Dapivirine Vaginal Ring for HIV Prevention in Women. *The New England journal of medicine*. 2016;375(22):2133-43.
27. Baeten JM, Palanee-Phillips T, Brown ER, Schwartz K, Soto-Torres LE, Govender V, et al. Use of a vaginal ring containing dapivirine for HIV-1 prevention in women. *New England Journal of Medicine*. 2016;375(22):2121-32.
28. Nel A, van Niekerk N, Van Baelen B, Malherbe M, Mans W, Carter A, et al. Safety, adherence, and HIV-1 seroconversion among women using the dapivirine vaginal ring (DREAM): an open-label, extension study. *The lancet HIV*. 2021;8(2):e77-e86.
29. Kusemererwa S, Abaasa A, Onyango M, Nel AM, Isaacs M, Asiki G. Contraceptive preference among women at risk of HIV acquisition in a preparatory screening study for a phase III microbicide trial in South Western Uganda. *AIDS and behavior*. 2018;22(1):131-8.
30. Sexually Transmitted Diseases Treatment Guidelines, (2010).
31. Myer L, Kuhn L, Stein ZA, Wright TC, Jr., Denny L. Intravaginal practices, bacterial vaginosis, and women's susceptibility to HIV infection: epidemiological evidence and biological mechanisms. *The Lancet Infectious diseases*. 2005;5(12):786-94.
32. Fonck K, Kaul R, Keli F, Bwayo JJ, Ngugi EN, Moses S, et al. Sexually transmitted infections and vaginal douching in a population of female sex workers in Nairobi, Kenya. *Sexually Transmitted Infections*. 2001;77(4):271-5.
33. Lees S, Zalwango F, Andrew B, Vandepitte J, Seeley J, Hayes RJ, et al. Understanding motives for intravaginal practices amongst Tanzanian and Ugandan women at high risk of HIV infection: The embodiment of social and cultural norms and well-being. *Social Science & Medicine*. 2014;102:165-73.
34. Hull T, Hilber AM, Chersich MF, Bagnol B, Prohmmo A, Smit JA, et al. Prevalence, motivations, and adverse effects of vaginal practices in Africa and Asia: findings from a multicountry household survey. *Journal of women's health*. 2011;20(7):1097-109.
35. Martin Hilber A, Kenter E, Redmond S, Merten S, Bagnol B, Low N, et al. Vaginal practices as women's agency in Sub-Saharan Africa: A synthesis of meaning and motivation through meta-ethnography. *Social Science & Medicine*. 2012;74(9):1311-23.

- 1
- 2
- 3
- 4 36. Allen CF, Desmond N, Chiduo B, Medard L, Lees SS, Vallely A, et al. Intravaginal and menstrual practices
- 5 among women working in food and recreational facilities in Mwanza, Tanzania: implications for microbicide
- 6 trials. *AIDS and behavior*. 2010;14:1169-81.
- 7 37. Gafos M, Pool R, Mzimela MA, Ndlovu HB, McCormack S, Elford J, et al. The implications of post-coital
- 8 intravaginal cleansing for the introduction of vaginal microbicides in South Africa. *AIDS and behavior*.
- 9 2014;18:297-310.
- 10 38. Masson L, Arnold KB, Little F, Mlisana K, Lewis DA, Mkhize N, et al. Inflammatory cytokine biomarkers
- 11 to identify women with asymptomatic sexually transmitted infections and bacterial vaginosis who are at high
- 12 risk of HIV infection. *Sexually transmitted infections*. 2016;92(3):186-93.
- 13 39. Mirzadeh M, Olfatifar M, Eslahi AV, Abdoli A, Houshmand E, Majidiani H, et al. Global prevalence of
- 14 *Trichomonas vaginalis* among female sex workers: a systematic review and meta-analysis. *Parasitology*
- 15 *research*. 2021;120(7):2311-22.
- 16 40. Umami A, Paulik E, Molnár R, Bhisma M. The relationship between genital hygiene behaviors and
- 17 genital infections among women: A systematic review. *Jurnal Ners*. 2022;17(1):89-101.
- 18 41. Daher A, Albaini O, Siff L, Farah S, Jallad K. Intimate hygiene practices and reproductive tract infections:
- 19 A systematic review. *Gynecology and Obstetrics Clinical Medicine*. 2022.
- 20 42. Myer L, Denny L, WRIGHT JR TC, DE SOUZA M, BARONE MA, Kuhn L. Intravaginal practices, HIV and
- 21 other sexually transmitted diseases among South African women. *Sexually Transmitted Diseases*. 2004:174-9.
- 22 43. Mwatelah R, McKinnon LR, Baxter C, Abdool Karim Q, Abdool Karim SS. Mechanisms of sexually
- 23 transmitted infection-induced inflammation in women: implications for HIV risk. *Journal of the International*
- 24 *AIDS Society*. 2019;22:e25346.
- 25 44. Masese L, Baeten JM, Richardson BA, Deya R, Kabare E, Bukusi E, et al. Incidence and correlates of
- 26 *Chlamydia trachomatis* infection in a high-risk cohort of Kenyan women. *Sex Transm Dis*. 2013;40(3):221-5.
- 27 45. Kusemererwa S, Abaasa A, Kabarambi A, Onyango M, Mugisha JO. Assessment of risk compensation
- 28 following use of the dapivirine vaginal ring in southwestern Uganda. *Sexually transmitted infections*. 2021.
- 29 46. Austin MN, Meyn LA, Avolia HA, Petrina MA, Cosentino LA, Alphonse C, et al. Impact of Dapivirine and
- 30 Placebo Vaginal Rings on the Microbiota of Adolescent, Lactating, and Postmenopausal Females. *The Journal of*
- 31 *infectious diseases*. 2022;225(12):2208-18.
- 32 47. Zuend CF, Noël-Romas L, Hoger S, McCorriser S, Westmacott G, Marrazzo J, et al. Influence of
- 33 dapivirine vaginal ring use on cervicovaginal immunity and functional microbiome in adolescent girls. *AIDS*
- 34 (London, England). 2021;35(3):369.
- 35 48. Nel A, Haazen W, Nuttall J, Romano J, Rosenberg Z, van Niekerk N. A safety and pharmacokinetic trial
- 36 assessing delivery of dapivirine from a vaginal ring in healthy women. *AIDS*. 2014;28(10):1479-87.
- 37 49. Obiero J, Ogongo P, Mwethera PG, Wiysonge CS. Topical microbicides for preventing sexually
- 38 transmitted infections. *The Cochrane database of systematic reviews*. 2021;3(3):Cd007961.
- 39 50. Clarke JG, Peipert JF, Hillier SL, Heber W, Boardman L, Moench TR, et al. Microflora changes with the
- 40 use of a vaginal microbicide. *Sexually transmitted diseases*. 2002:288-93.
- 41 51. Juarez-Colunga E, Rosenfeld M, Zemanick ET, Wagner B. Application of multiple event analysis as an
- 42 alternative approach to studying pulmonary exacerbations as an outcome measure. *Journal of Cystic Fibrosis*.
- 43 2020;19(1):114-8.
- 44
- 45
- 46
- 47
- 48
- 49
- 50
- 51
- 52
- 53
- 54
- 55
- 56
- 57
- 58
- 59
- 60

## STROBE Statement—checklist of items that should be included in reports of observational studies

|                              | Item No | Recommendation                                                                                                                                                                                                                                                                                                                                                                                                                                                         | Page No |
|------------------------------|---------|------------------------------------------------------------------------------------------------------------------------------------------------------------------------------------------------------------------------------------------------------------------------------------------------------------------------------------------------------------------------------------------------------------------------------------------------------------------------|---------|
| <b>Title and abstract</b>    | 1       | (a) Indicate the study's design with a commonly used term in the title or the abstract                                                                                                                                                                                                                                                                                                                                                                                 | 2       |
|                              |         | (b) Provide in the abstract an informative and balanced summary of what was done and what was found                                                                                                                                                                                                                                                                                                                                                                    | 2       |
| <b>Introduction</b>          |         |                                                                                                                                                                                                                                                                                                                                                                                                                                                                        |         |
| Background/rationale         | 2       | Explain the scientific background and rationale for the investigation being reported                                                                                                                                                                                                                                                                                                                                                                                   | 4, 5    |
| Objectives                   | 3       | State specific objectives, including any prespecified hypotheses                                                                                                                                                                                                                                                                                                                                                                                                       | 4, 5    |
| <b>Methods</b>               |         |                                                                                                                                                                                                                                                                                                                                                                                                                                                                        |         |
| Study design                 | 4       | Present key elements of study design early in the paper                                                                                                                                                                                                                                                                                                                                                                                                                | 5       |
| Setting                      | 5       | Describe the setting, locations, and relevant dates, including periods of recruitment, exposure, follow-up, and data collection                                                                                                                                                                                                                                                                                                                                        | 5, 6    |
| Participants                 | 6       | (a) <i>Cohort study</i> —Give the eligibility criteria, and the sources and methods of selection of participants. Describe methods of follow-up<br><i>Case-control study</i> —Give the eligibility criteria, and the sources and methods of case ascertainment and control selection. Give the rationale for the choice of cases and controls<br><i>Cross-sectional study</i> —Give the eligibility criteria, and the sources and methods of selection of participants | 5, 6    |
|                              |         | (b) <i>Cohort study</i> —For matched studies, give matching criteria and number of exposed and unexposed<br><i>Case-control study</i> —For matched studies, give matching criteria and the number of controls per case                                                                                                                                                                                                                                                 | NA      |
| Variables                    | 7       | Clearly define all outcomes, exposures, predictors, potential confounders, and effect modifiers. Give diagnostic criteria, if applicable                                                                                                                                                                                                                                                                                                                               | 6, 7    |
| Data sources/<br>measurement | 8*      | For each variable of interest, give sources of data and details of methods of assessment (measurement). Describe comparability of assessment methods if there is more than one group                                                                                                                                                                                                                                                                                   | 6, 7    |
| Bias                         | 9       | Describe any efforts to address potential sources of bias                                                                                                                                                                                                                                                                                                                                                                                                              | 6, 7    |
| Study size                   | 10      | Explain how the study size was arrived at                                                                                                                                                                                                                                                                                                                                                                                                                              | 5, 6    |
| Quantitative variables       | 11      | Explain how quantitative variables were handled in the analyses. If applicable, describe which groupings were chosen and why                                                                                                                                                                                                                                                                                                                                           | 6, 7    |
| Statistical methods          | 12      | (a) Describe all statistical methods, including those used to control for confounding                                                                                                                                                                                                                                                                                                                                                                                  | 7       |
|                              |         | (b) Describe any methods used to examine subgroups and interactions                                                                                                                                                                                                                                                                                                                                                                                                    | NA      |
|                              |         | (c) Explain how missing data were addressed                                                                                                                                                                                                                                                                                                                                                                                                                            | NA      |
|                              |         | (d) <i>Cohort study</i> —If applicable, explain how loss to follow-up was addressed<br><i>Case-control study</i> —If applicable, explain how matching of cases and controls was addressed<br><i>Cross-sectional study</i> —If applicable, describe analytical methods taking account of sampling strategy                                                                                                                                                              | NA      |
|                              |         | (e) Describe any sensitivity analyses                                                                                                                                                                                                                                                                                                                                                                                                                                  | 7       |

Continued on next page

| <b>Results</b>           |     |                                                                                                                                                                                                              | <b>Page</b>    |
|--------------------------|-----|--------------------------------------------------------------------------------------------------------------------------------------------------------------------------------------------------------------|----------------|
| Participants             | 13* | (a) Report numbers of individuals at each stage of study—eg numbers potentially eligible, examined for eligibility, confirmed eligible, included in the study, completing follow-up, and analysed            | 9, 10, 11      |
|                          |     | (b) Give reasons for non-participation at each stage                                                                                                                                                         | NA             |
|                          |     | (c) Consider use of a flow diagram                                                                                                                                                                           | NA             |
| Descriptive data         | 14* | (a) Give characteristics of study participants (eg demographic, clinical, social) and information on exposures and potential confounders                                                                     | 9, 10, 11      |
|                          |     | (b) Indicate number of participants with missing data for each variable of interest                                                                                                                          | NA             |
|                          |     | (c) <i>Cohort study</i> —Summarise follow-up time (eg, average and total amount)                                                                                                                             |                |
| Outcome data             | 15* | <i>Cohort study</i> —Report numbers of outcome events or summary measures over time                                                                                                                          | 11, 12, 13, 14 |
|                          |     | <i>Case-control study</i> —Report numbers in each exposure category, or summary measures of exposure                                                                                                         |                |
|                          |     | <i>Cross-sectional study</i> —Report numbers of outcome events or summary measures                                                                                                                           |                |
| Main results             | 16  | (a) Give unadjusted estimates and, if applicable, confounder-adjusted estimates and their precision (eg, 95% confidence interval). Make clear which confounders were adjusted for and why they were included | 11, 12, 13, 14 |
|                          |     | (b) Report category boundaries when continuous variables were categorized                                                                                                                                    |                |
|                          |     | (c) If relevant, consider translating estimates of relative risk into absolute risk for a meaningful time period                                                                                             |                |
| Other analyses           | 17  | Report other analyses done—eg analyses of subgroups and interactions, and sensitivity analyses                                                                                                               | NA             |
| <b>Discussion</b>        |     |                                                                                                                                                                                                              |                |
| Key results              | 18  | Summarise key results with reference to study objectives                                                                                                                                                     | 15, 16         |
| Limitations              | 19  | Discuss limitations of the study, taking into account sources of potential bias or imprecision. Discuss both direction and magnitude of any potential bias                                                   | 16,17          |
| Interpretation           | 20  | Give a cautious overall interpretation of results considering objectives, limitations, multiplicity of analyses, results from similar studies, and other relevant evidence                                   | 17             |
| Generalisability         | 21  | Discuss the generalisability (external validity) of the study results                                                                                                                                        | 17             |
| <b>Other information</b> |     |                                                                                                                                                                                                              |                |
| Funding                  | 22  | Give the source of funding and the role of the funders for the present study and, if applicable, for the original study on which the present article is based                                                | 17             |

\*Give information separately for cases and controls in case-control studies and, if applicable, for exposed and unexposed groups in cohort and cross-sectional studies.

**Note:** An Explanation and Elaboration article discusses each checklist item and gives methodological background and published examples of transparent reporting. The STROBE checklist is best used in conjunction with this article (freely available on the Web sites of PLoS Medicine at <http://www.plosmedicine.org/>, Annals of Internal Medicine at <http://www.annals.org/>, and Epidemiology at <http://www.epidem.com/>). Information on the STROBE Initiative is available at [www.strobe-statement.org](http://www.strobe-statement.org).
